# Supplementary material for: Comparison of stochastic parameterizations in the framework of a coupled ocean–atmosphere model
Source: Copernicus journal article supplement (doi:10.5194/npg-25-605-2018), 2018-08-30

# A stochastic parameterization framework for the MAOOAM model: Supplementary material

Jonathan Demaeyer and Stéphane Vannitsem

Institut Royal Météorologique de Belgique, Avenue Circulaire, 3, 1180 Brussels, Belgium

## **Abstract**

We compile in this document all the figures that were not crucial to the flow of the main article.

# Contents

|          |                                                                                        |           |
|----------|----------------------------------------------------------------------------------------|-----------|
| <b>1</b> | <b>Parameterization of the wavenumber 2 atmospheric variables</b>                      | <b>3</b>  |
| 1.1      | DV2017 parameter set . . . . .                                                         | 3         |
| 1.1.1    | PDFs and autocorrelation functions of the resolved variables . . . . .                 | 3         |
| 1.1.2    | Kullback-Leibler divergences . . . . .                                                 | 12        |
| 1.2      | DDV2016 parameter set . . . . .                                                        | 12        |
| 1.2.1    | PDFs and autocorrelation functions of the resolved variables . . . . .                 | 12        |
| 1.2.2    | Kullback-Leibler divergences . . . . .                                                 | 21        |
| 1.3      | noLFV parameter set . . . . .                                                          | 21        |
| 1.3.1    | PDFs and autocorrelation functions of the resolved variables . . . . .                 | 21        |
| 1.3.2    | Kullback-Leibler divergences . . . . .                                                 | 30        |
| <b>2</b> | <b>Parameterization of the wavenumber 2 atmospheric baroclinic variables</b>           | <b>30</b> |
| 2.1      | DV2017 parameter set . . . . .                                                         | 30        |
| 2.1.1    | PDFs and autocorrelation functions of the resolved variables . . . . .                 | 30        |
| 2.1.2    | Kullback-Leibler divergences . . . . .                                                 | 40        |
| 2.2      | DDV2016 parameter set . . . . .                                                        | 40        |
| 2.2.1    | PDFs and autocorrelation functions of the resolved variables . . . . .                 | 40        |
| 2.2.2    | Kullback-Leibler divergences . . . . .                                                 | 50        |
| 2.3      | noLFV parameter set . . . . .                                                          | 50        |
| 2.3.1    | PDFs and autocorrelation functions of the resolved variables . . . . .                 | 50        |
| 2.3.2    | Kullback-Leibler divergences . . . . .                                                 | 60        |
| <b>3</b> | <b>The parameterization of the atmospheric wavenumber 2 and <math>F_4</math> modes</b> | <b>60</b> |
| 3.1      | DV2017 parameter set . . . . .                                                         | 60        |
| 3.1.1    | PDFs and autocorrelation functions of the resolved variables . . . . .                 | 60        |
| 3.1.2    | Kullback-Leibler divergences . . . . .                                                 | 69        |
| 3.2      | noLFV parameter set . . . . .                                                          | 69        |
| 3.2.1    | PDFs and autocorrelation functions of the resolved variables . . . . .                 | 69        |
| 3.2.2    | Kullback-Leibler divergences . . . . .                                                 | 77        |

# 1 Parameterization of the wavenumber 2 atmospheric variables

All the figures compiled in this section are related to the experiment described in the section 4.1.2 and concern the “DV2017”, “DDV2016” and “noLFV” parameter sets.

## 1.1 DV2017 parameter set

### 1.1.1 PDFs and autocorrelation functions of the resolved variables

Atmospheric variables of the model.

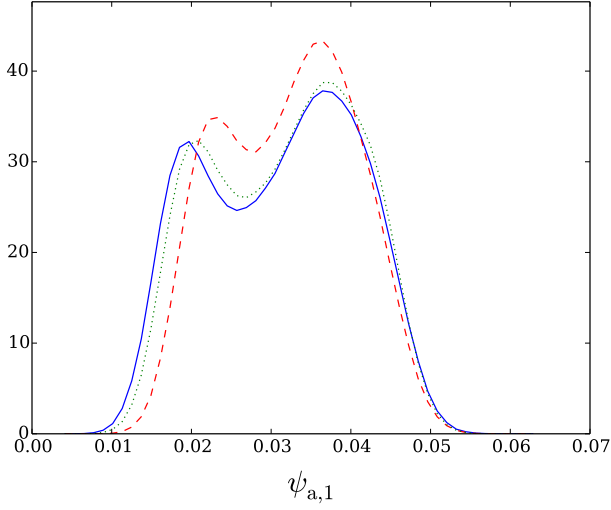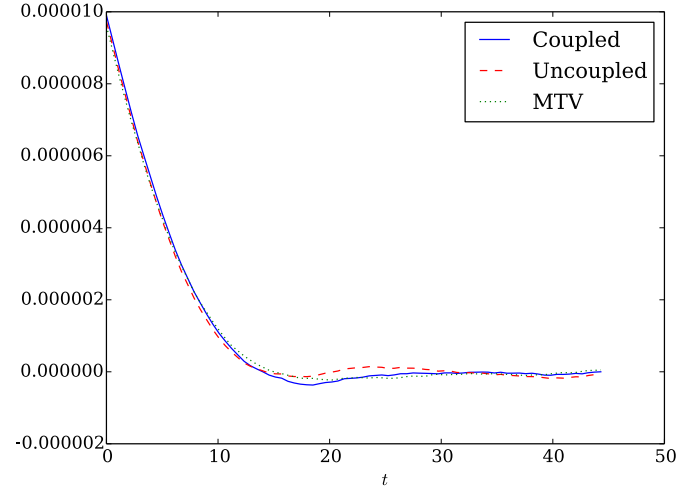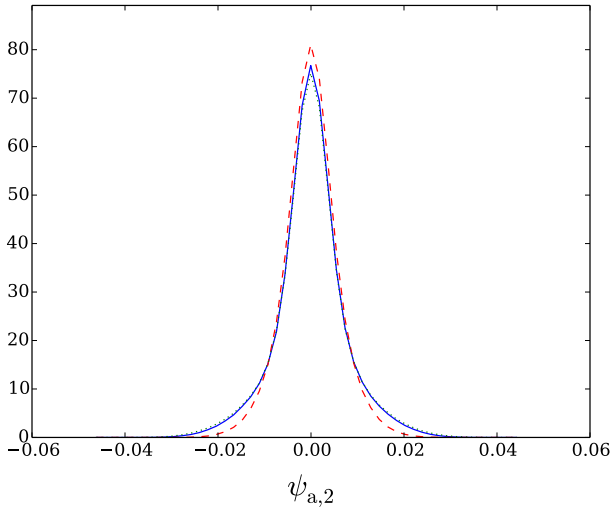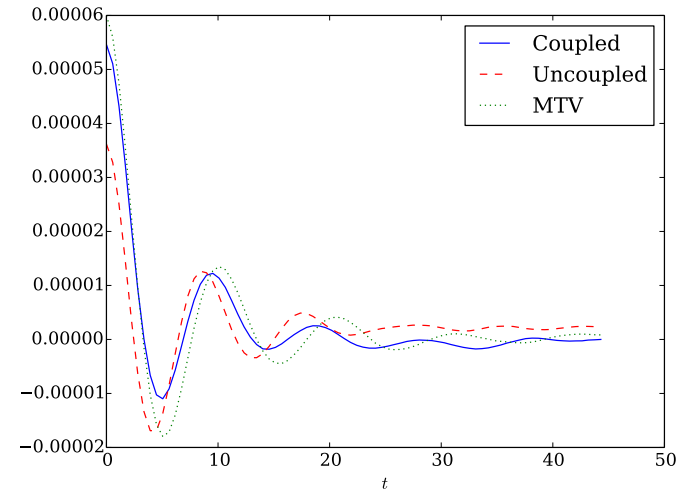

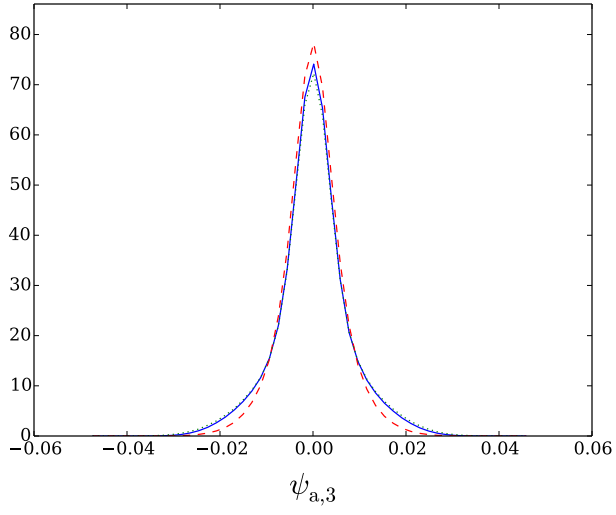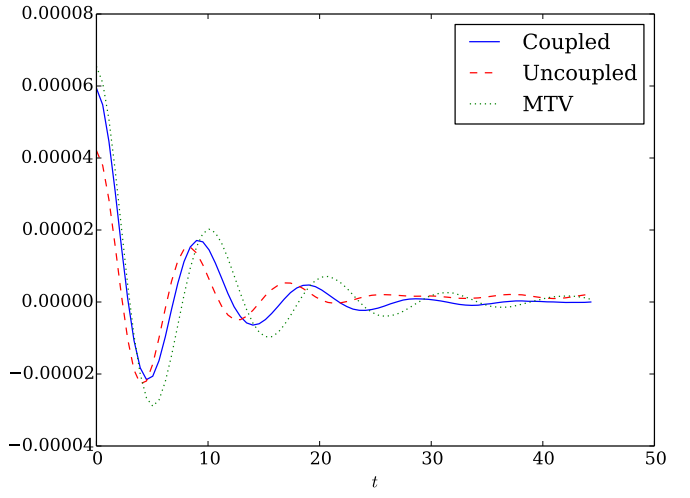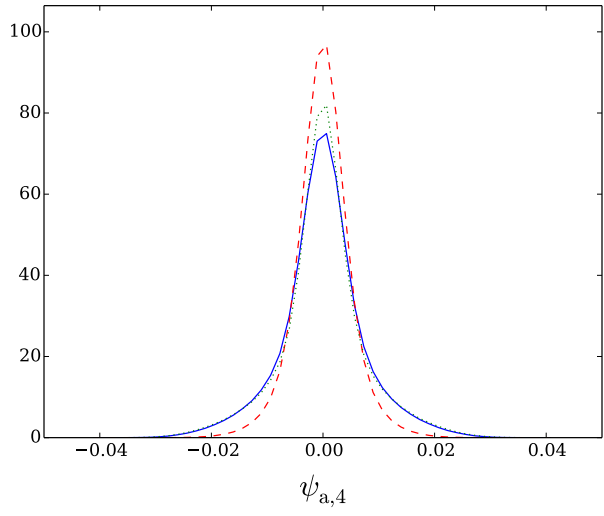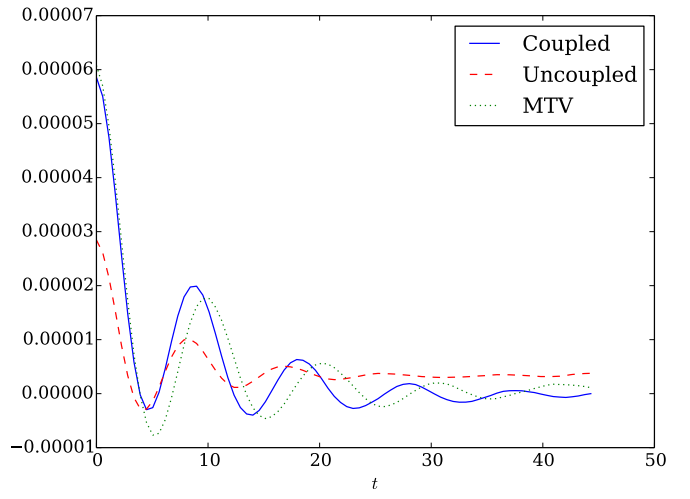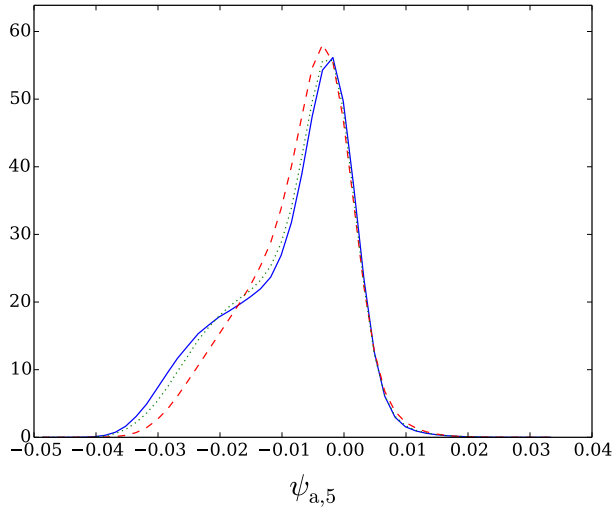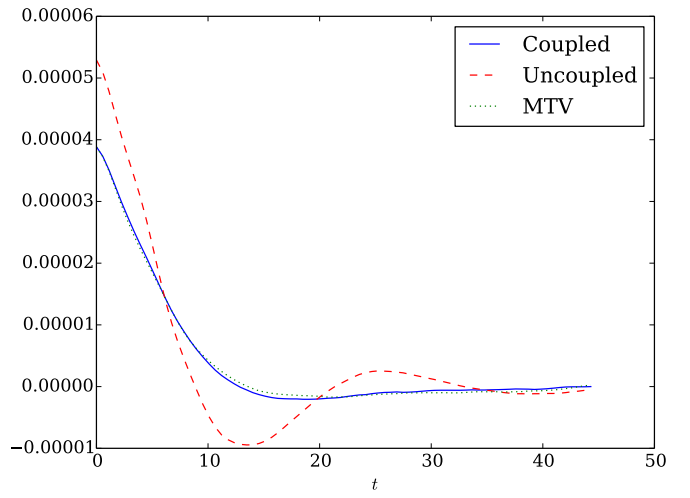

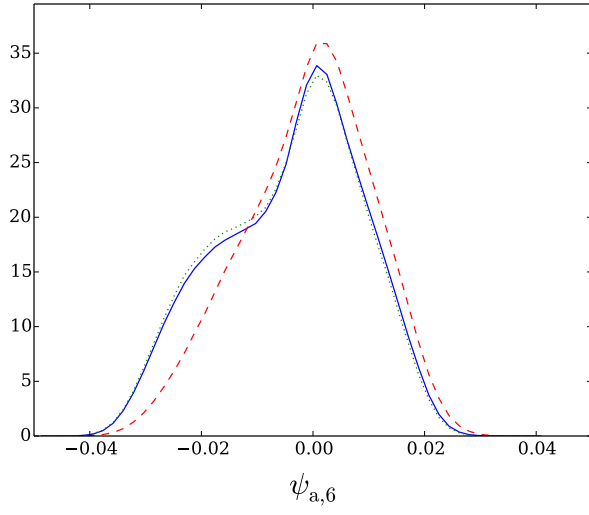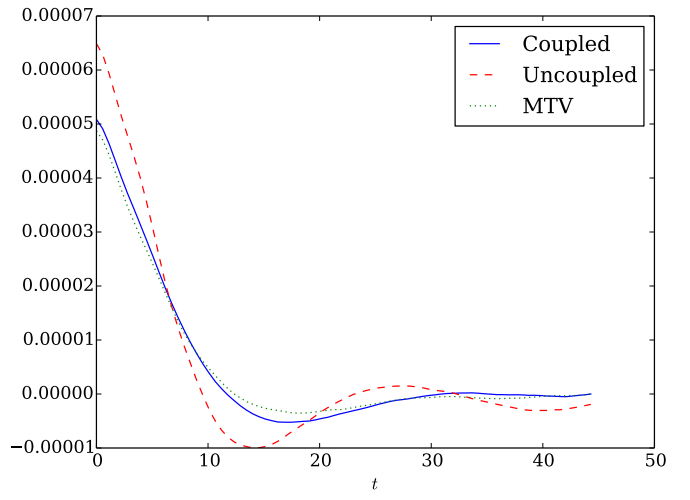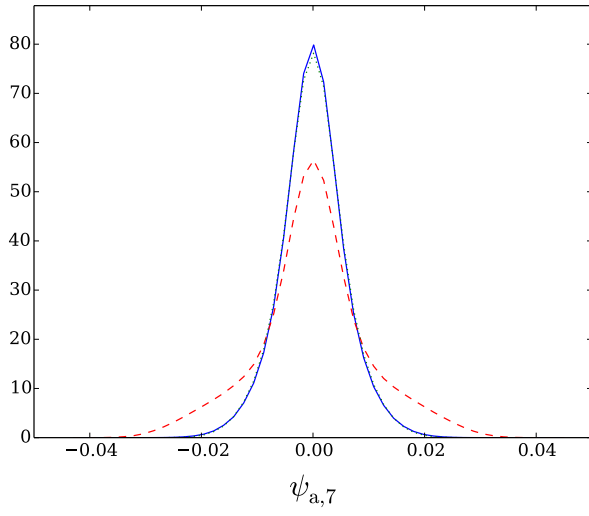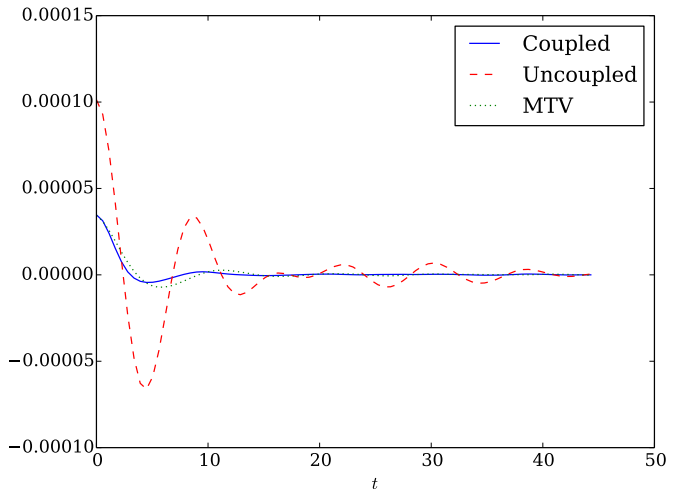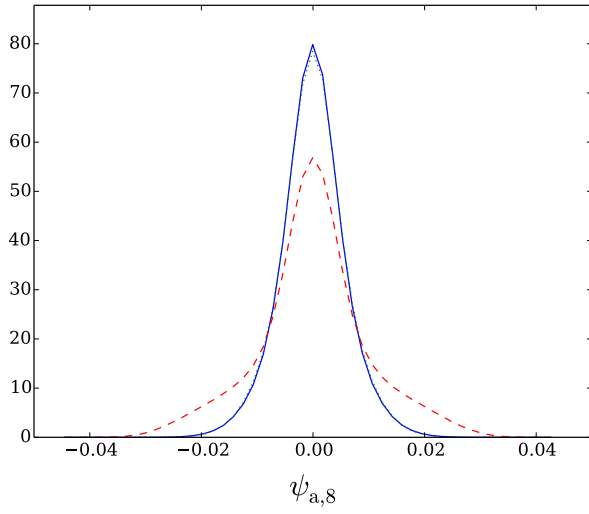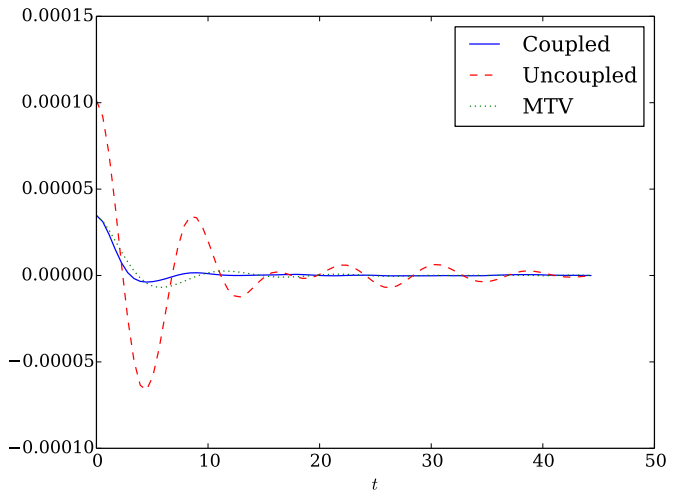

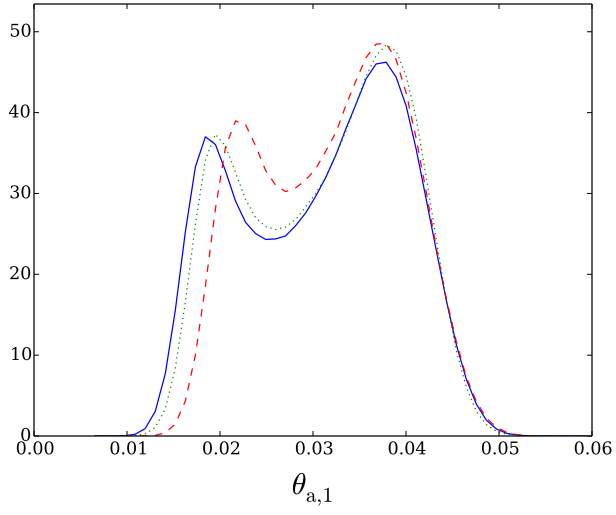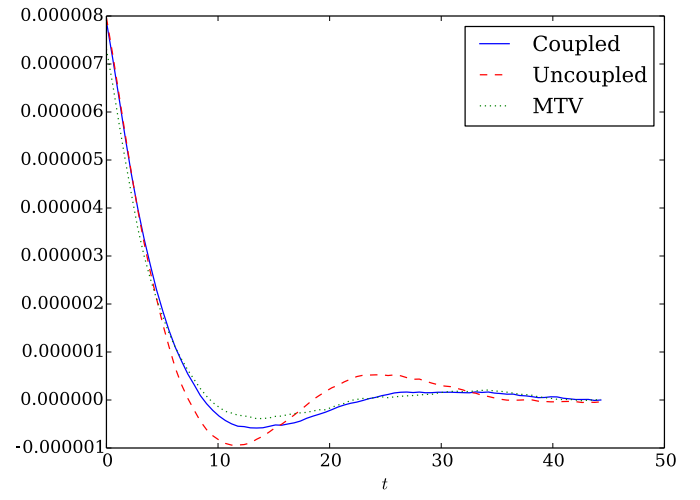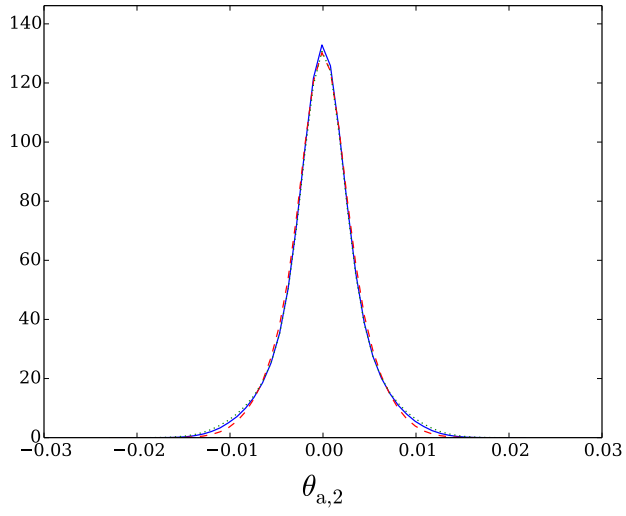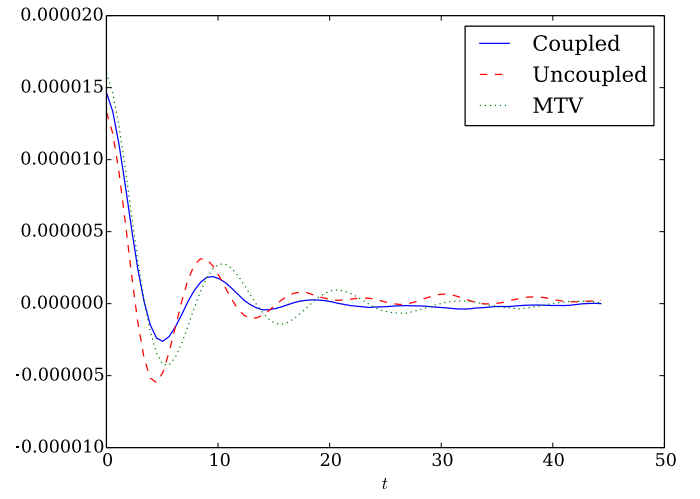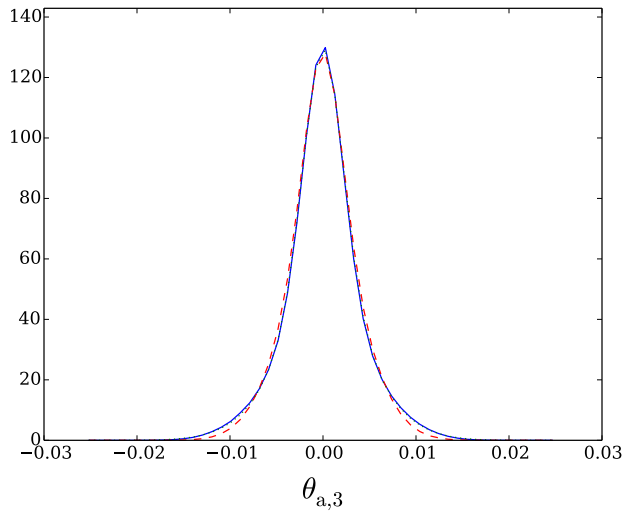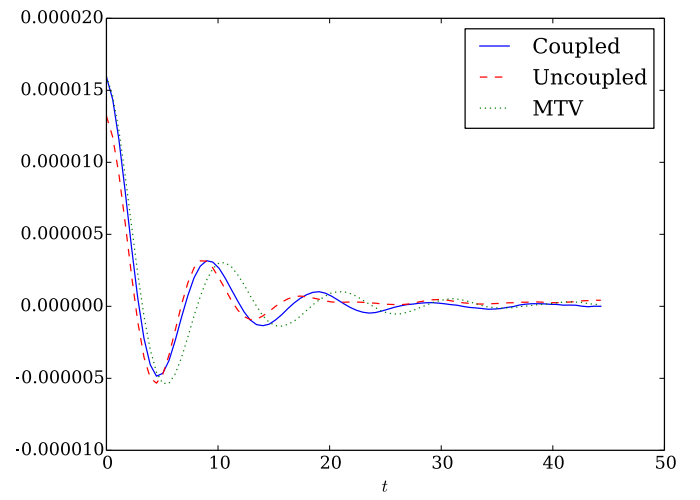

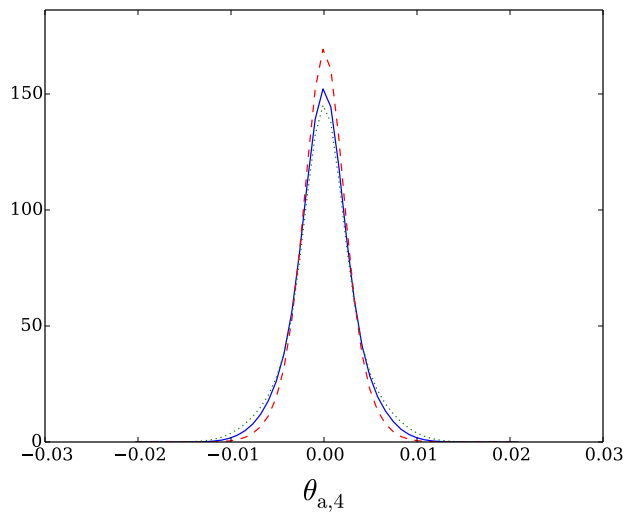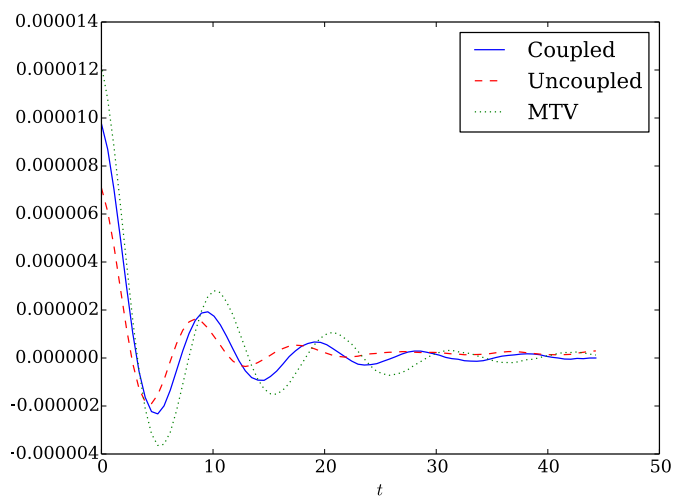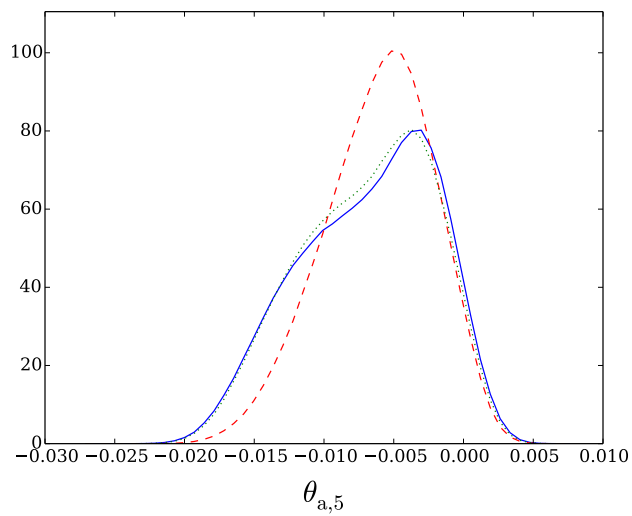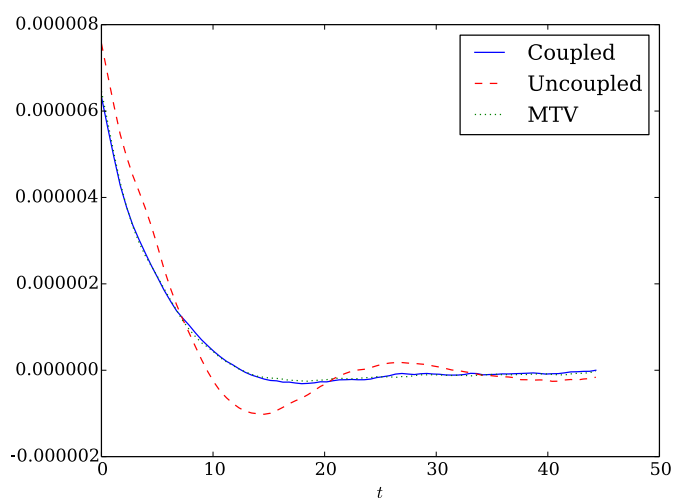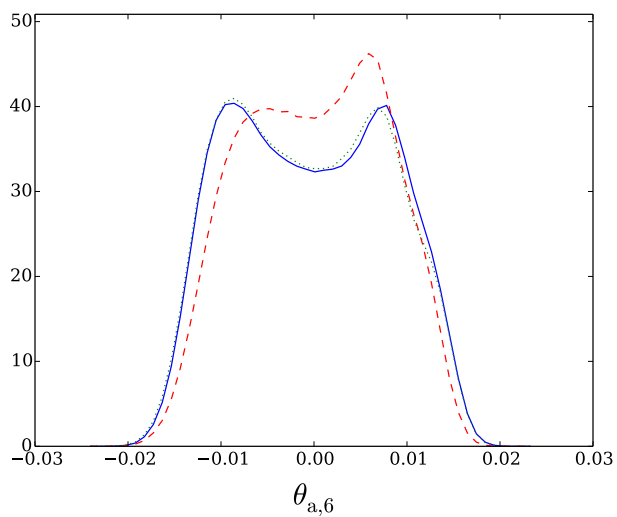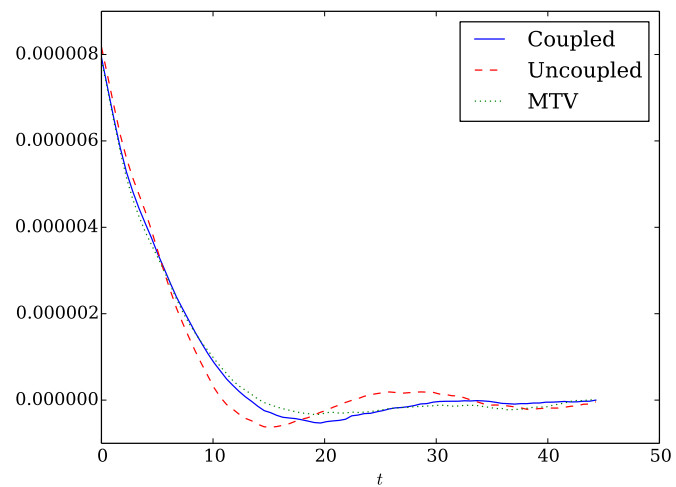

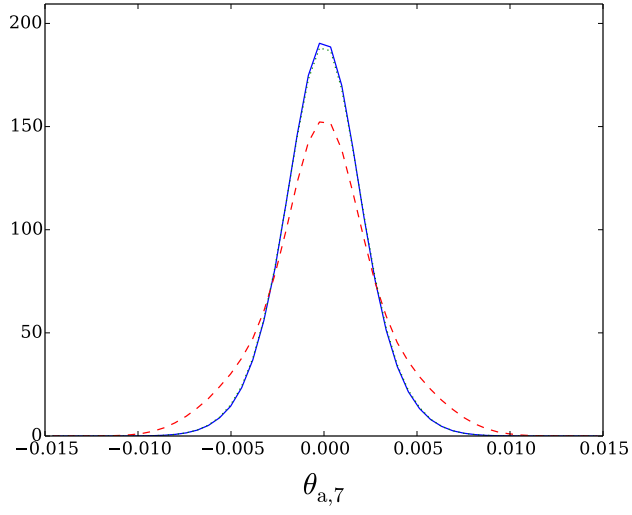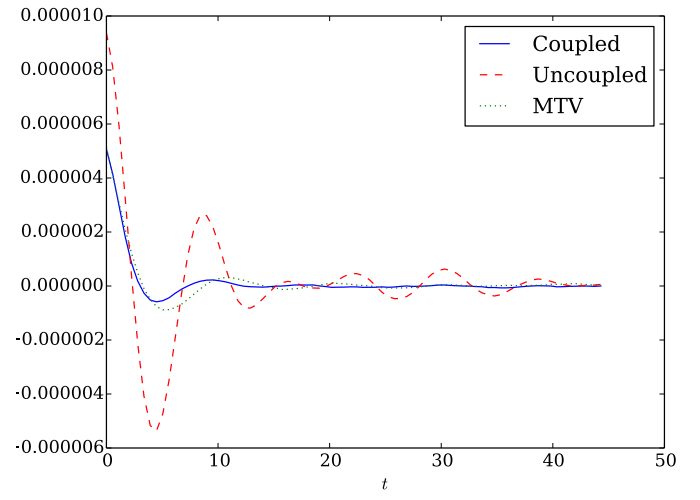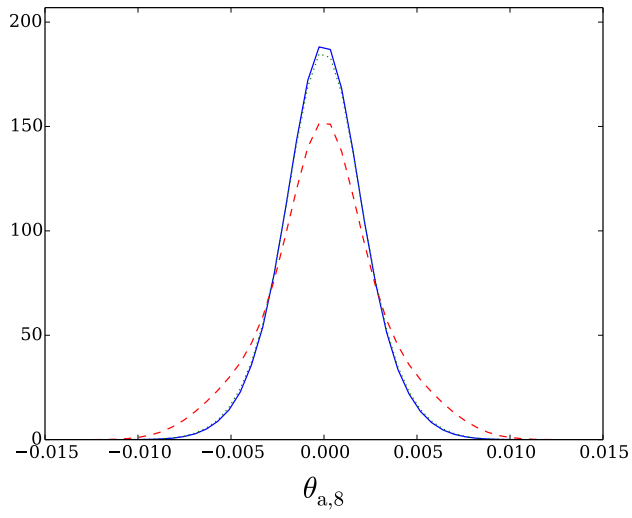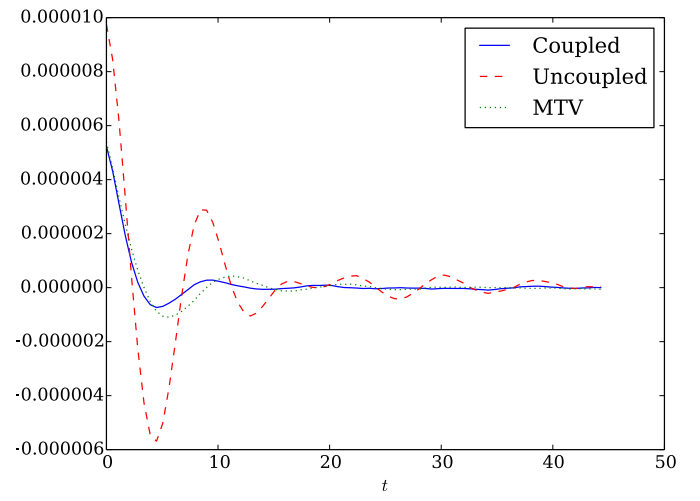

**Oceanic variables** Only the PDFs are available for these variables.

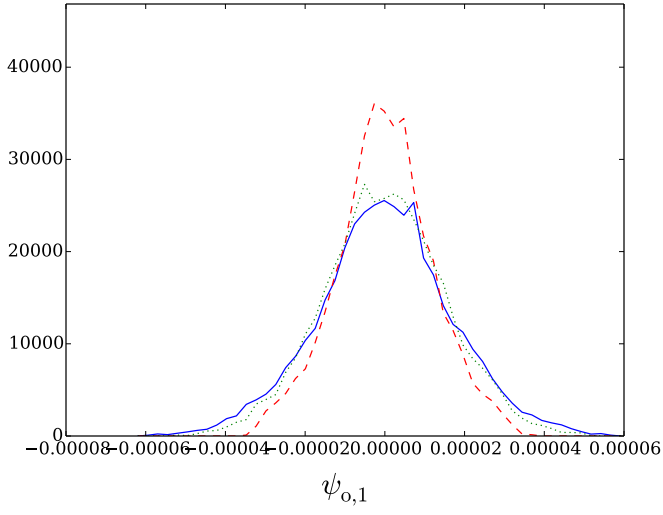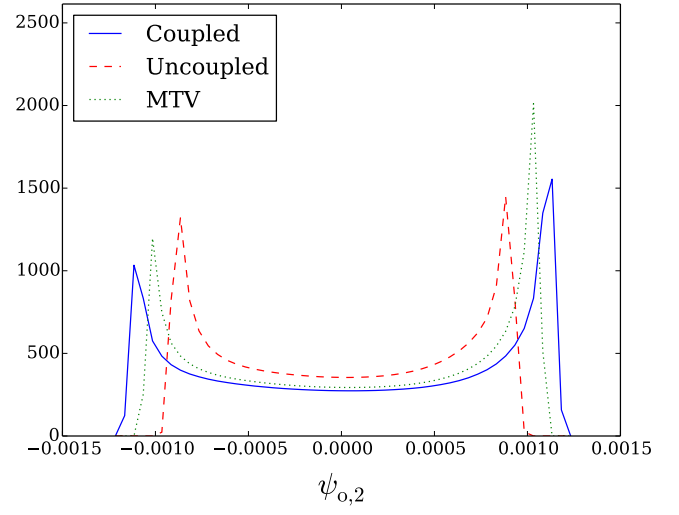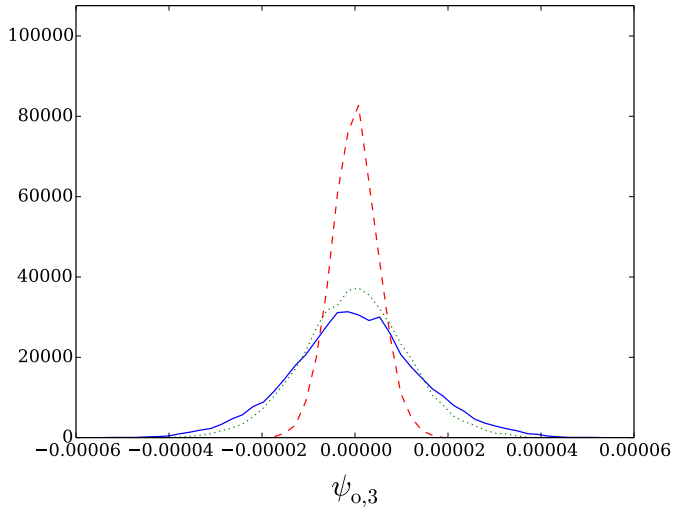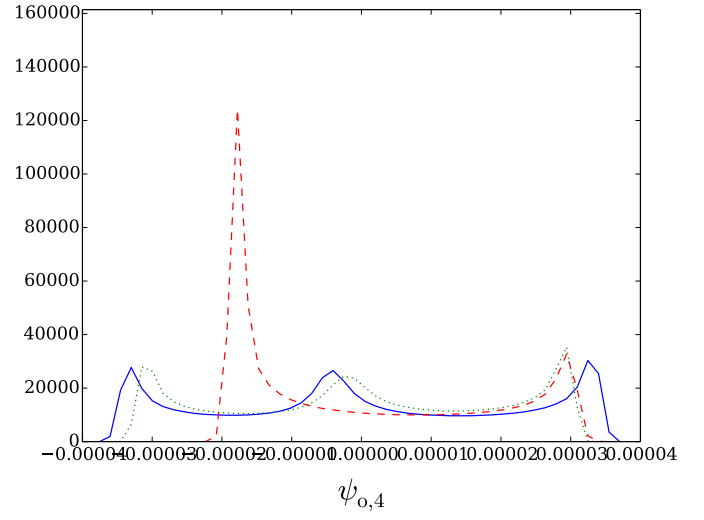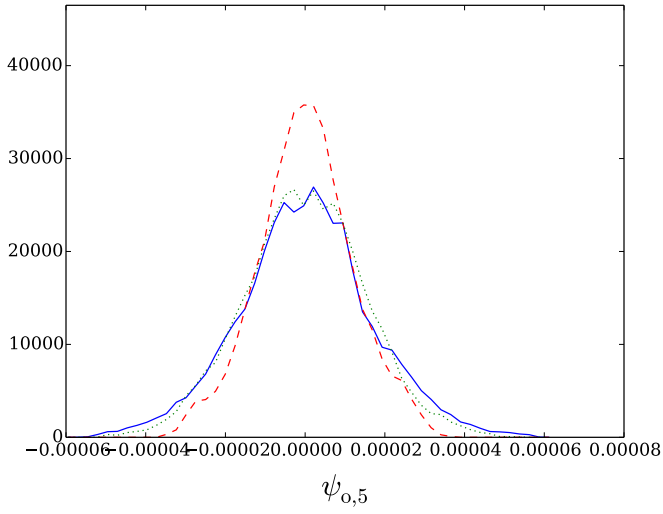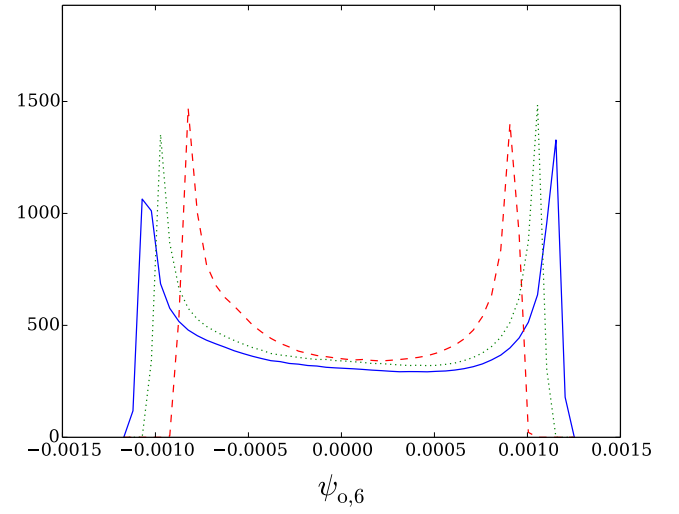

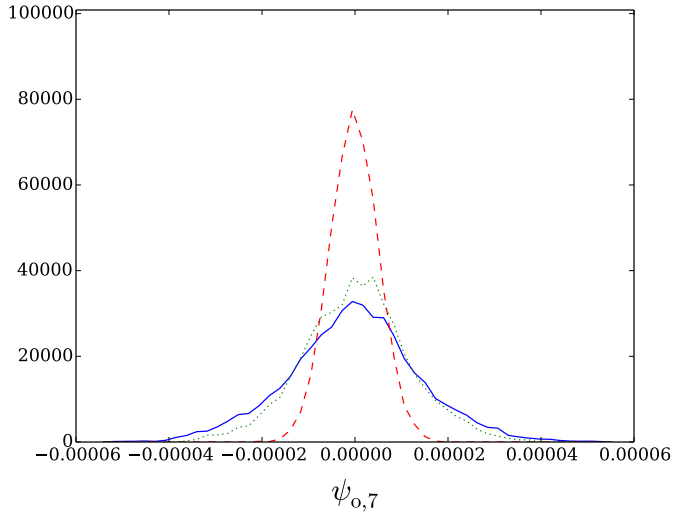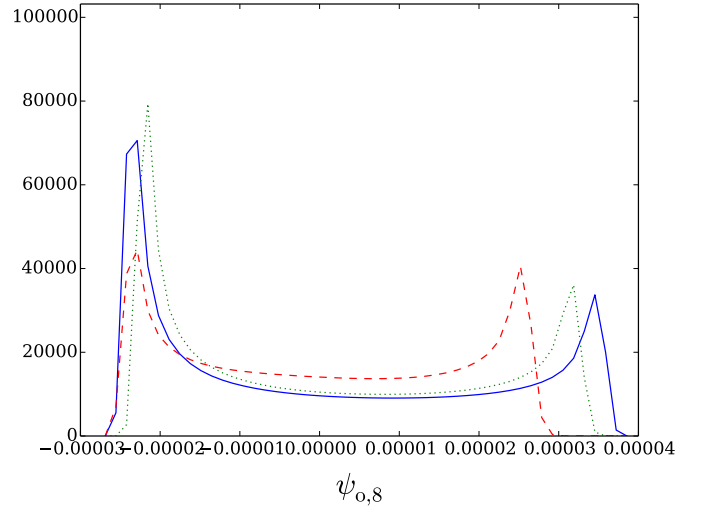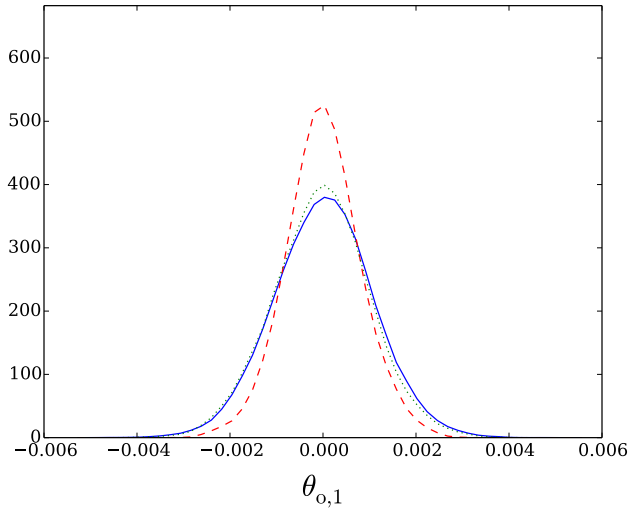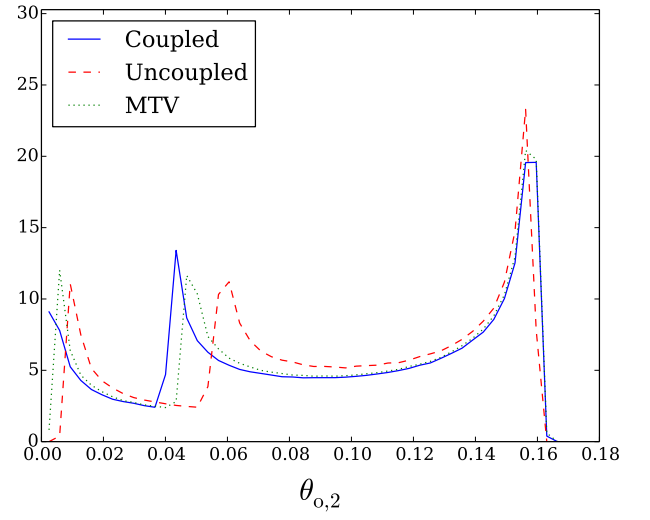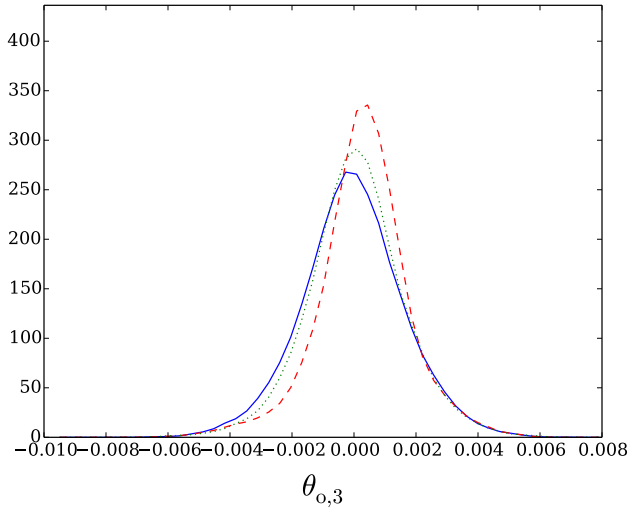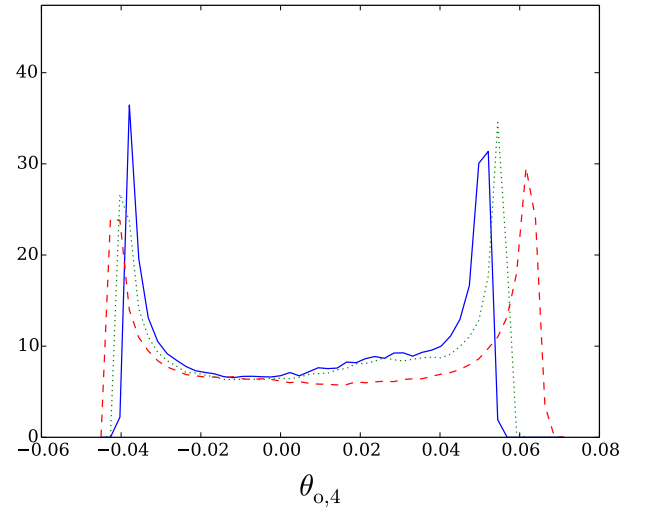

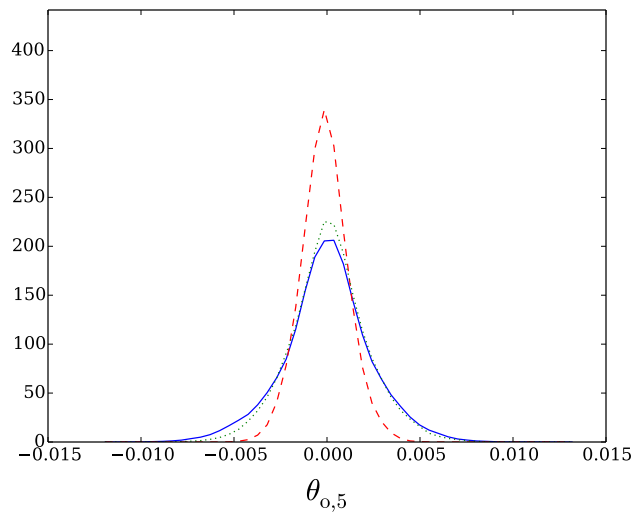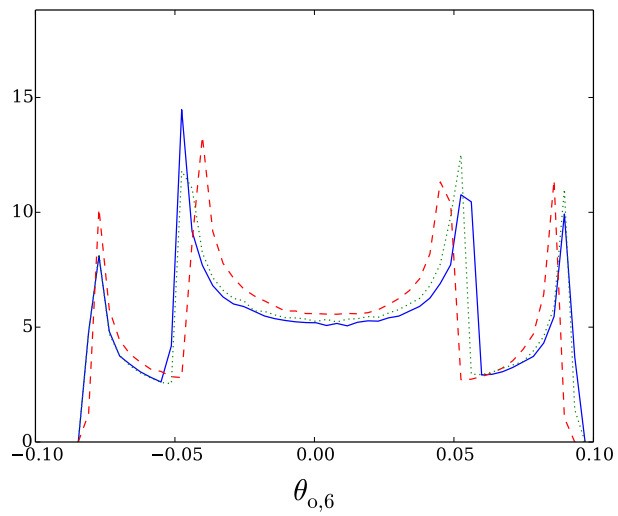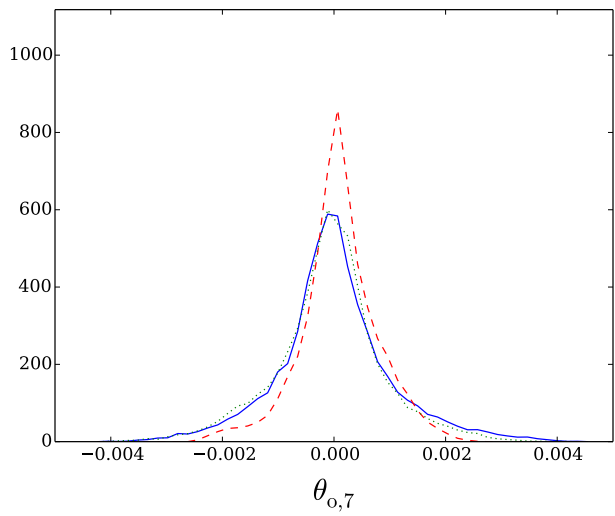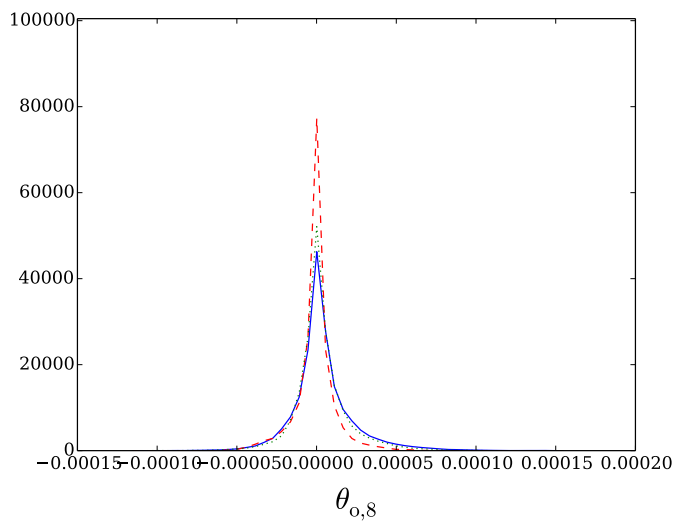

## 1.1.2 Kullback-Leibler divergences

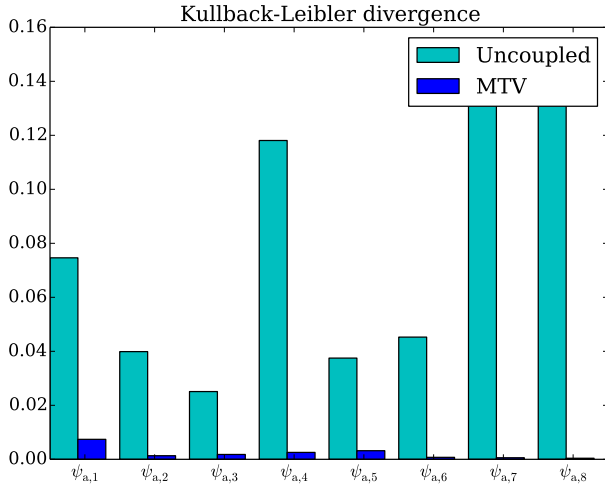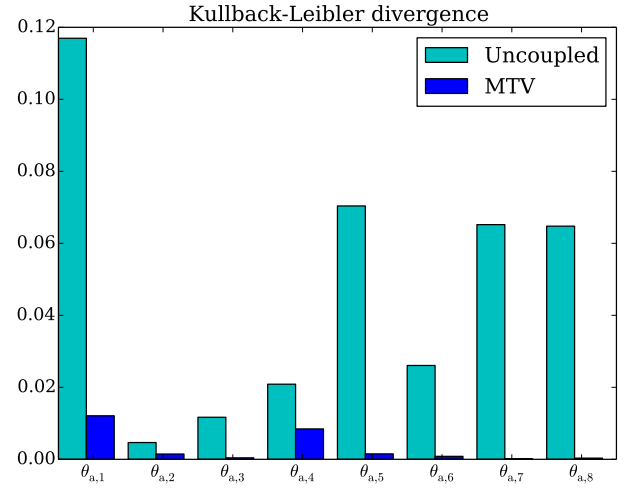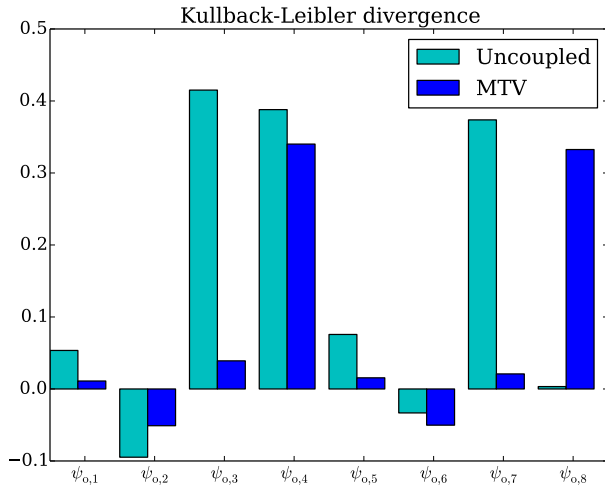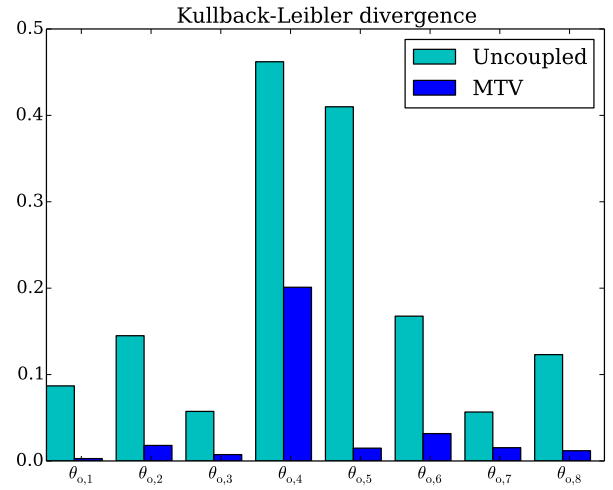

## 1.2 DDV2016 parameter set

### 1.2.1 PDFs and autocorrelation functions of the resolved variables

Atmospheric variables of the model.

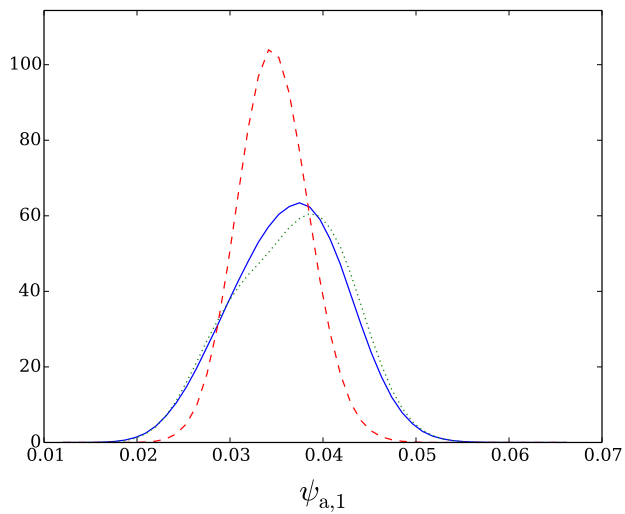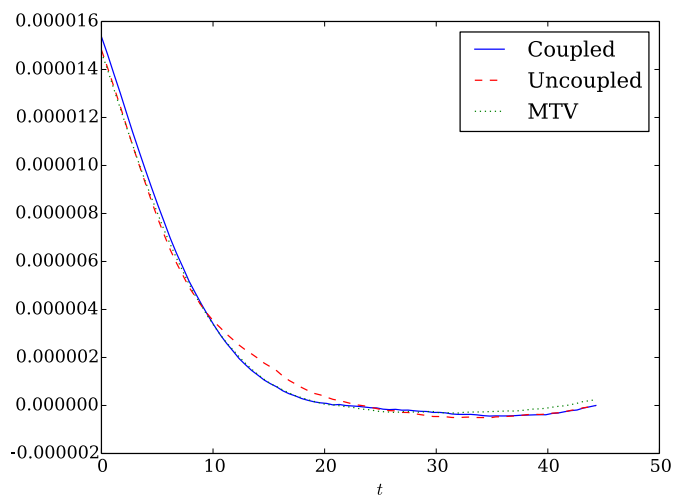

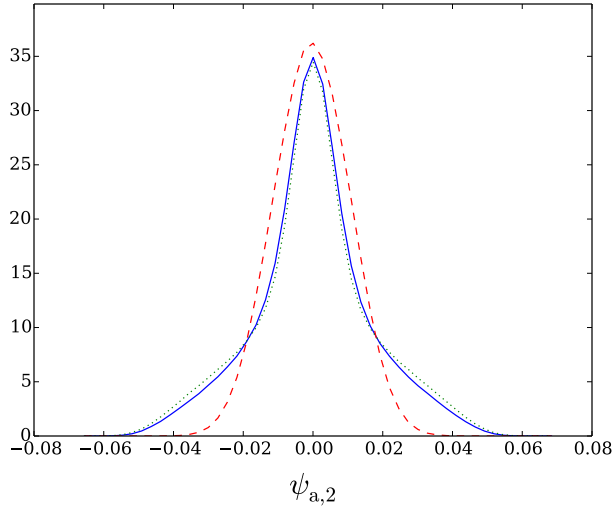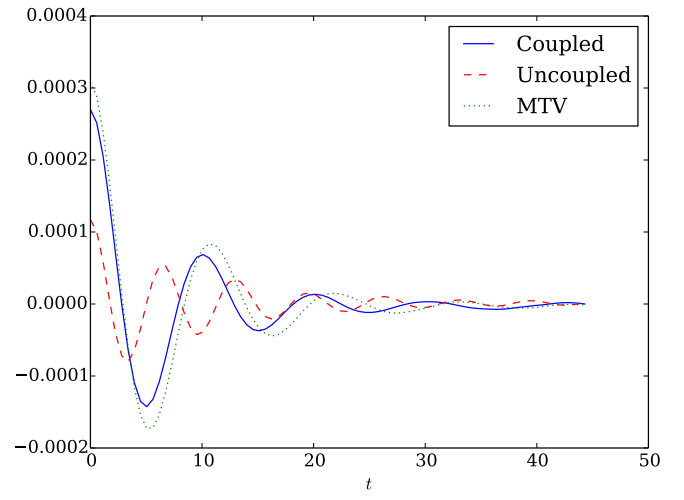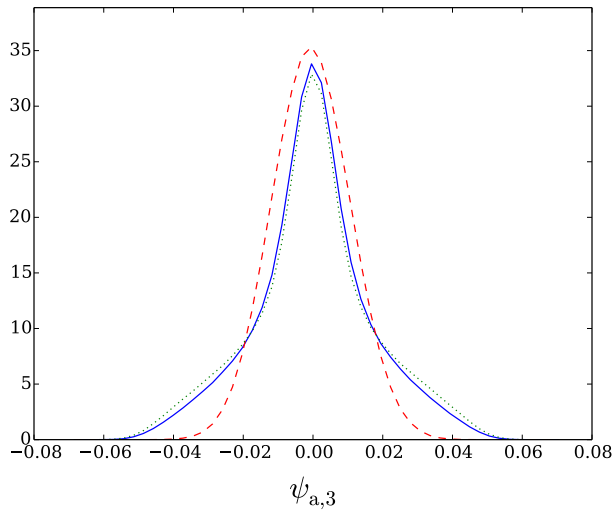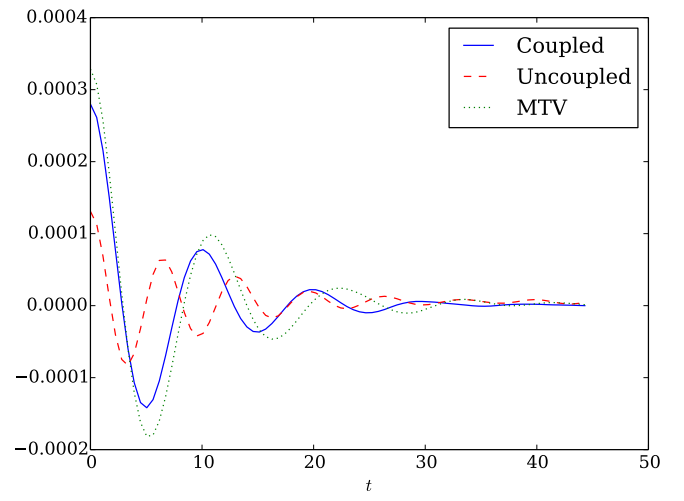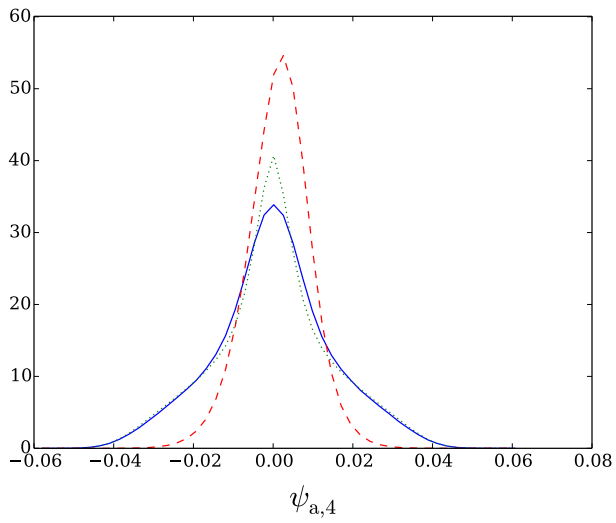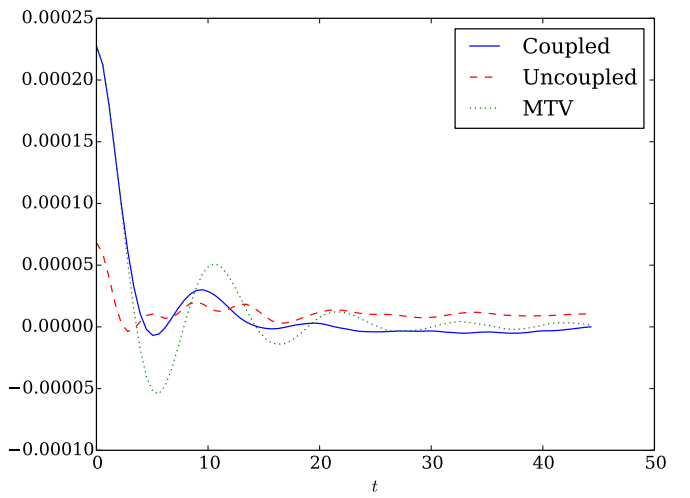

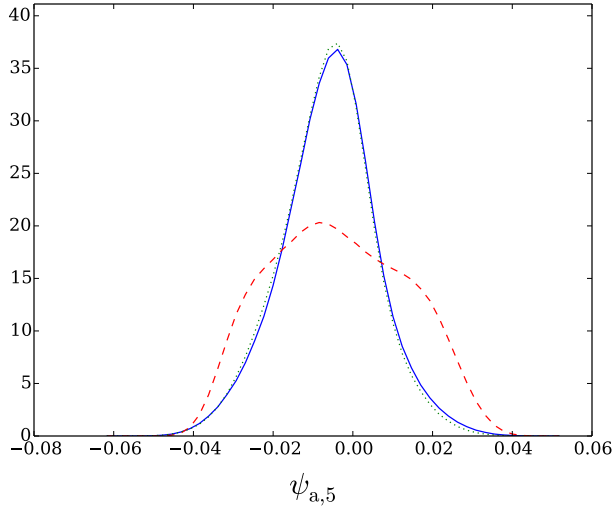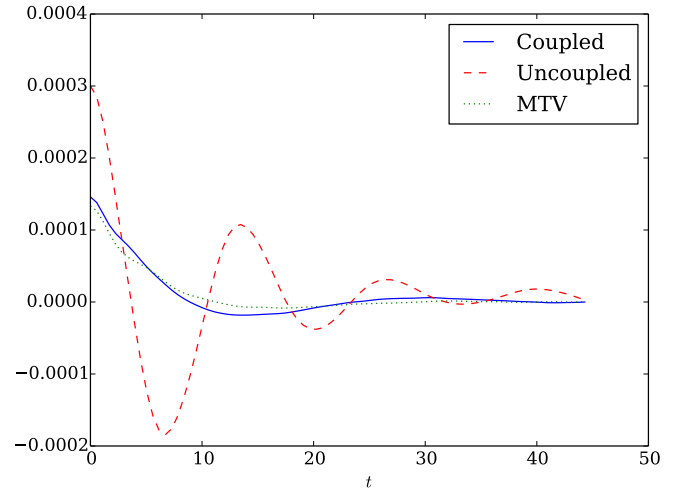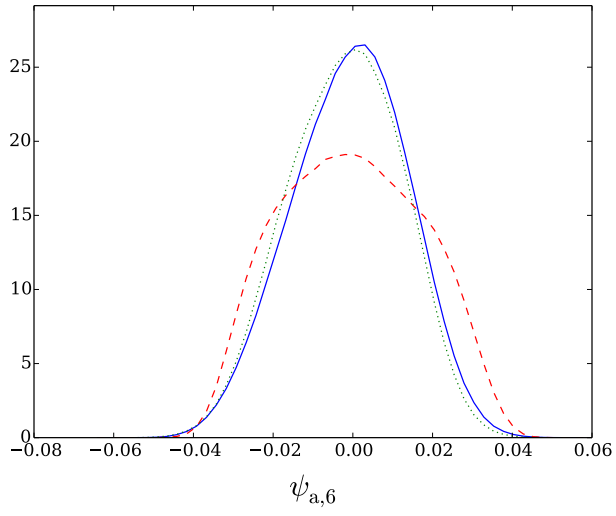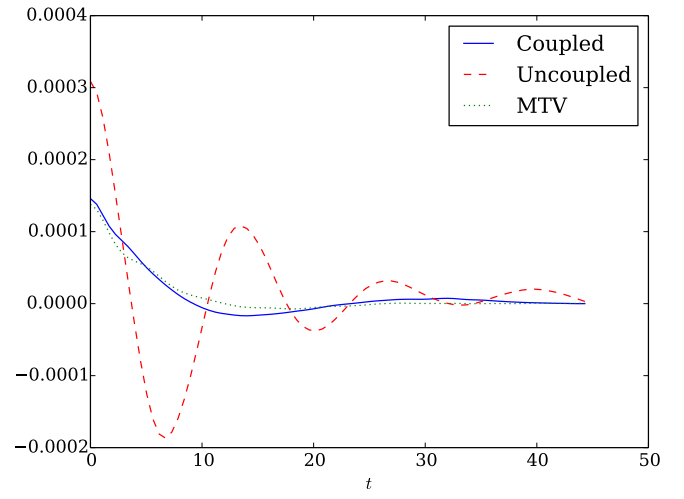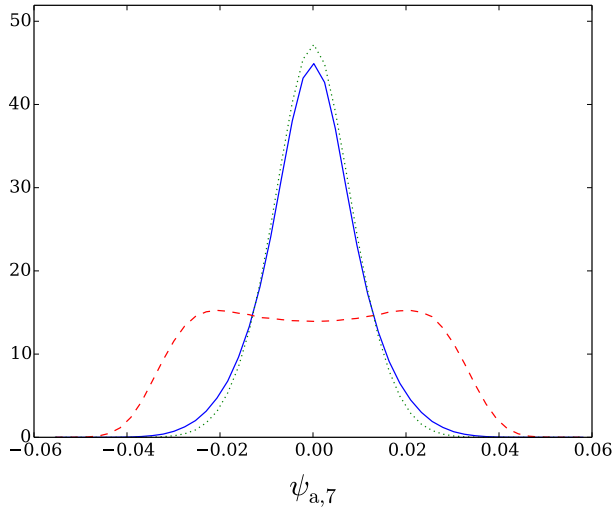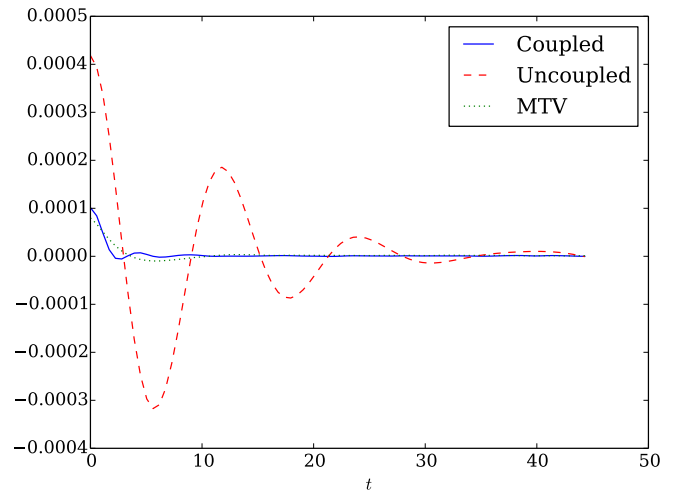

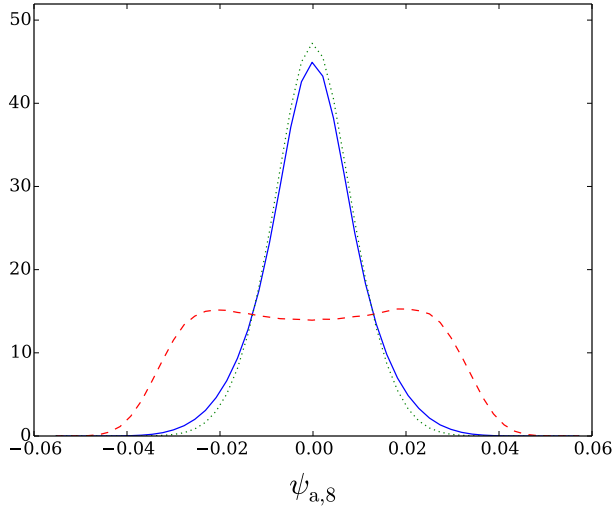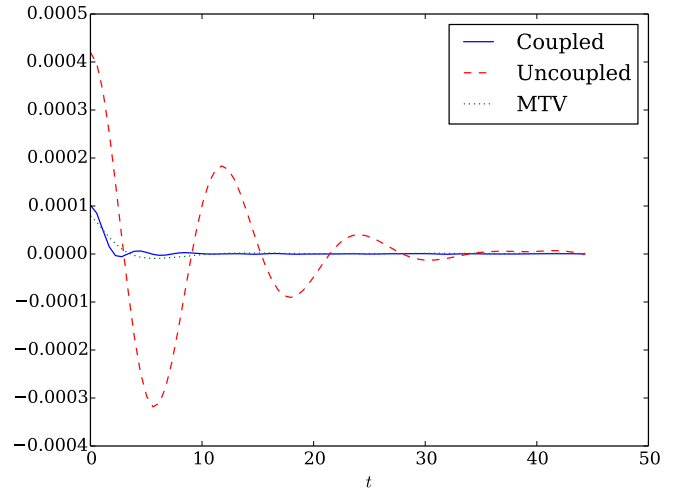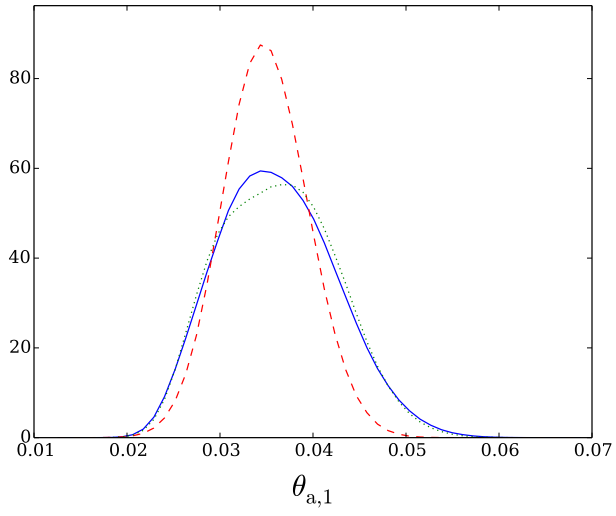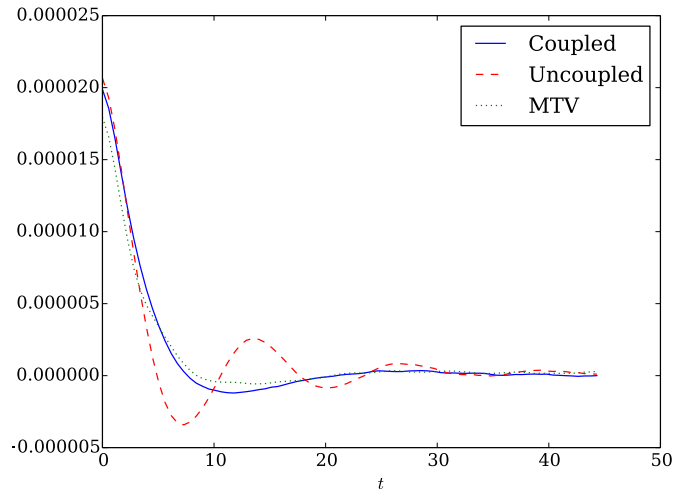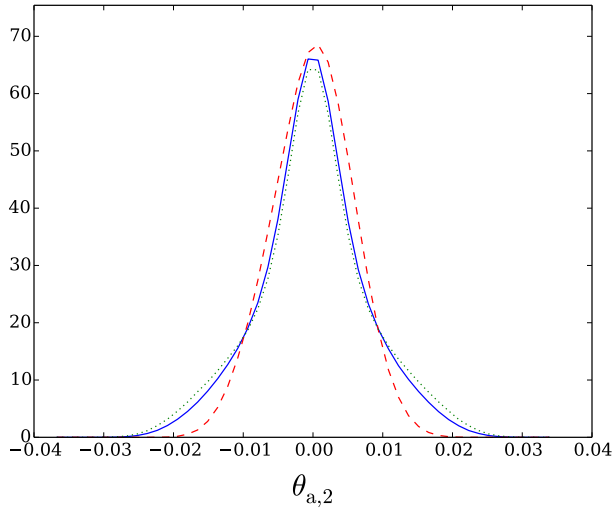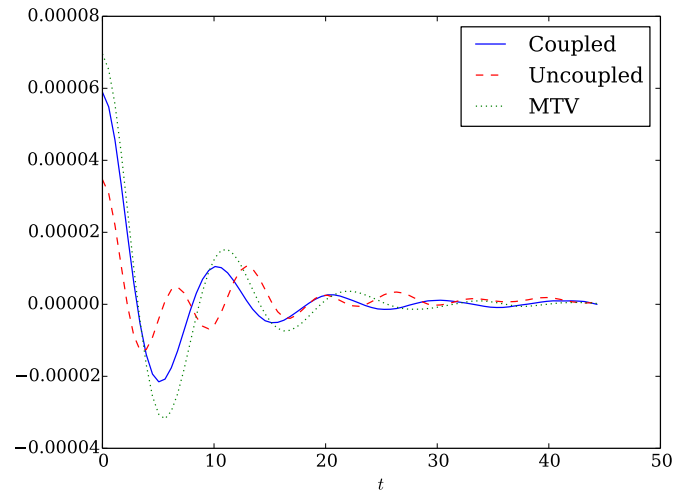

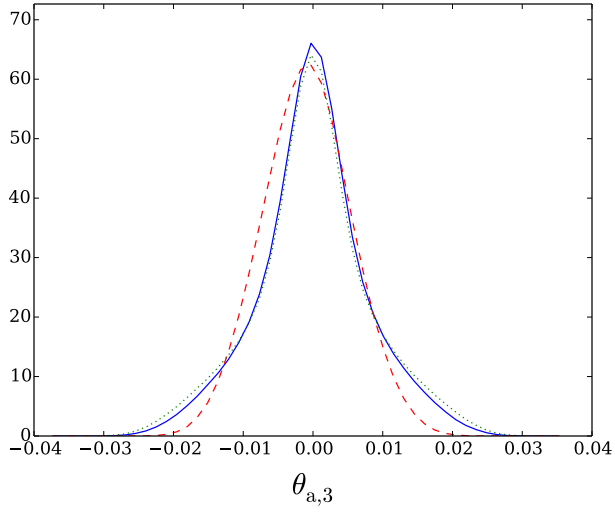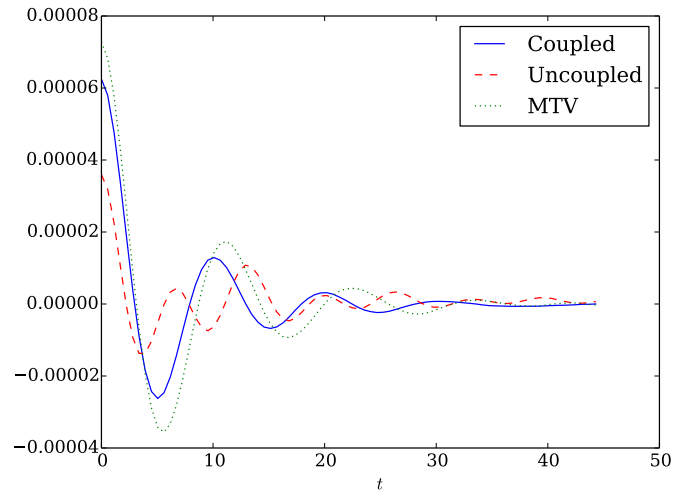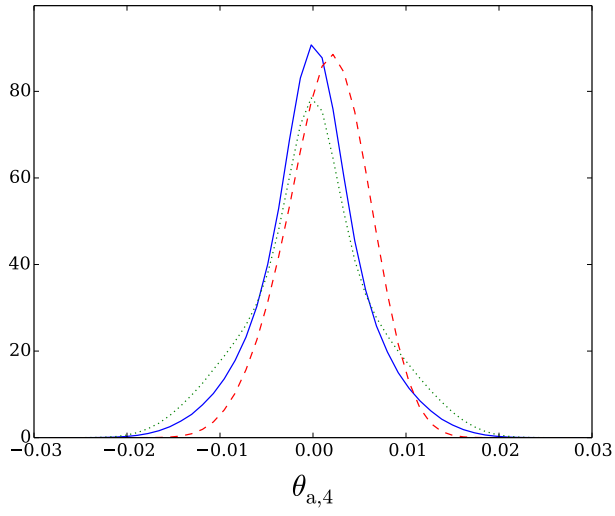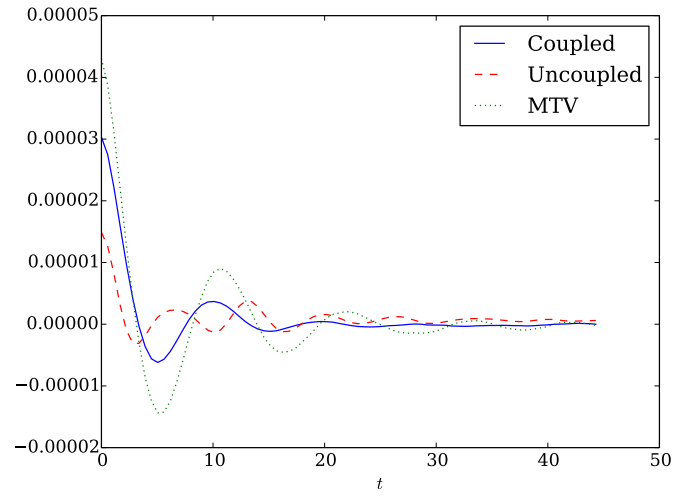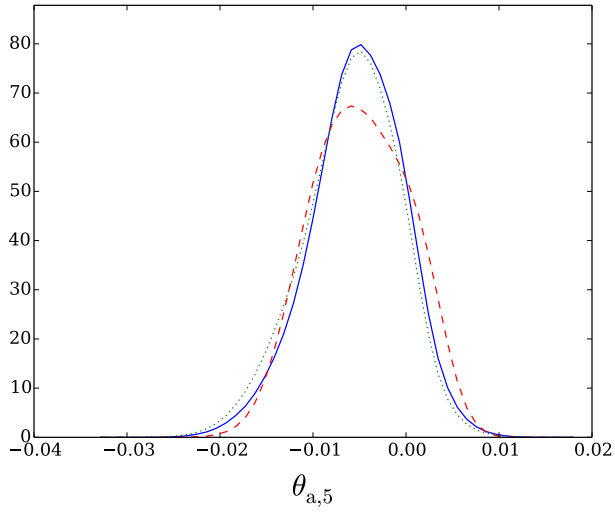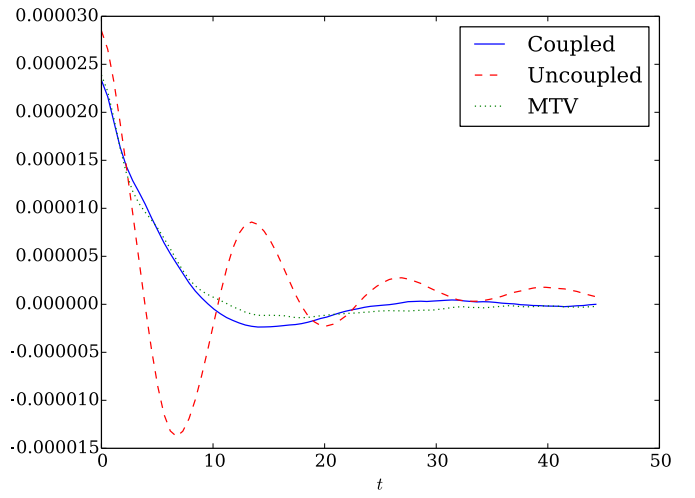

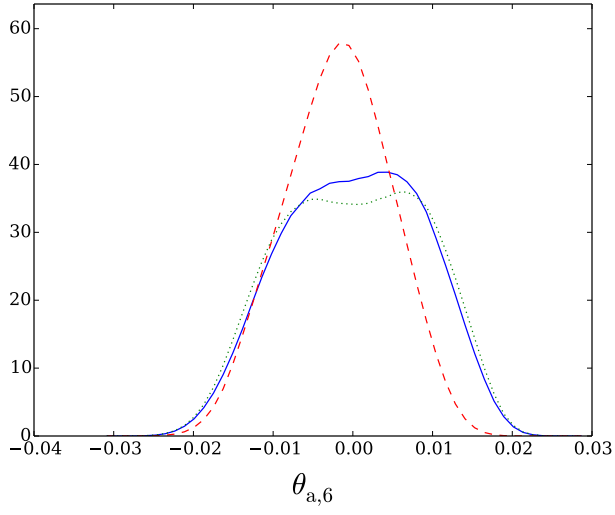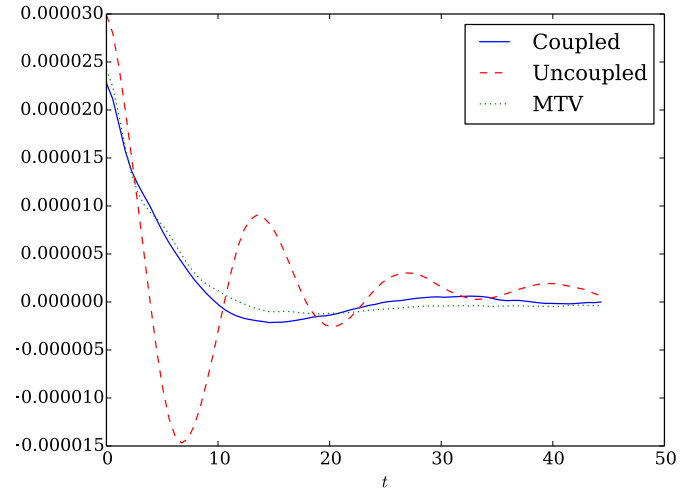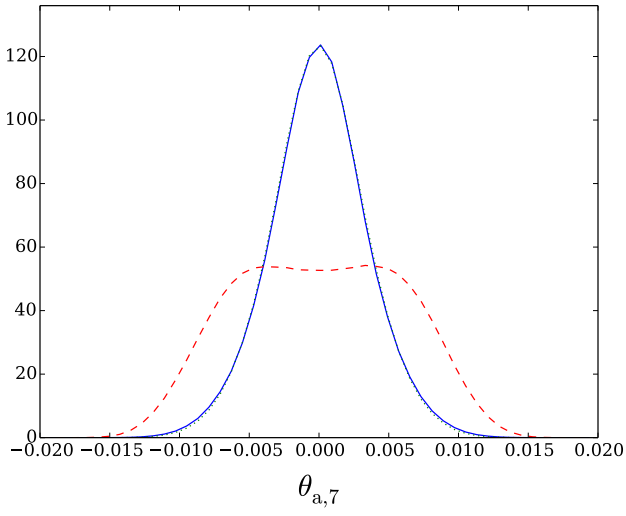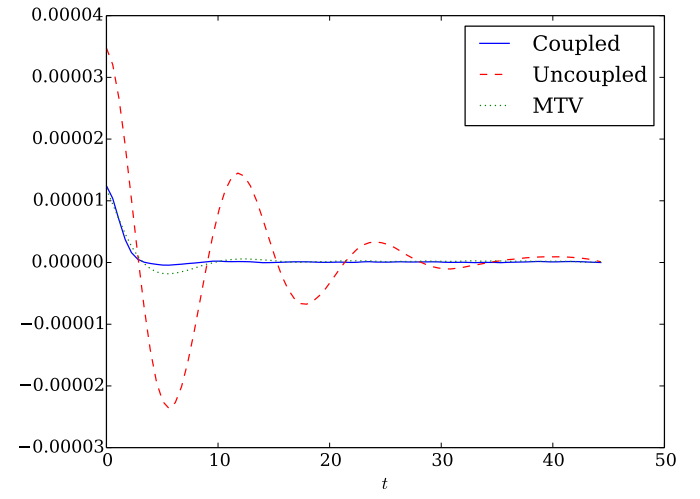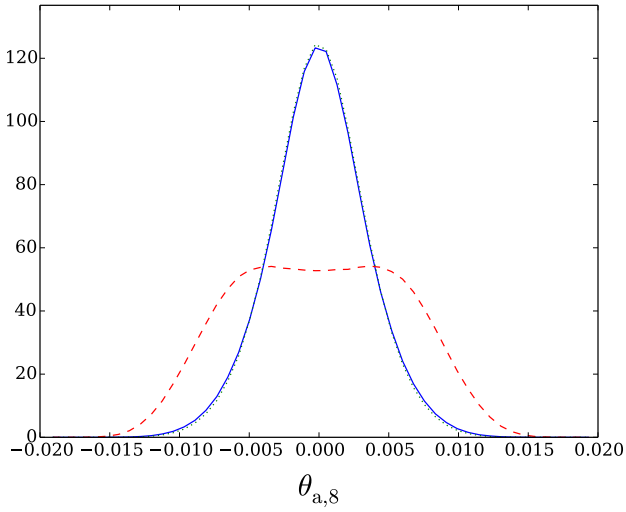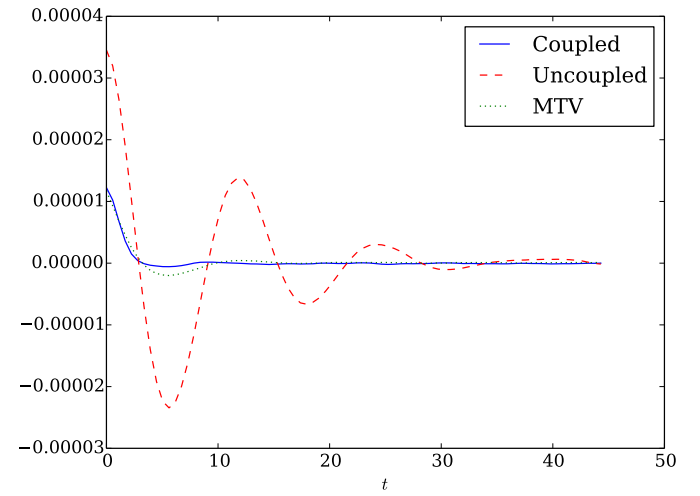

**Oceanic variables** Only the PDFs are available for these variables.

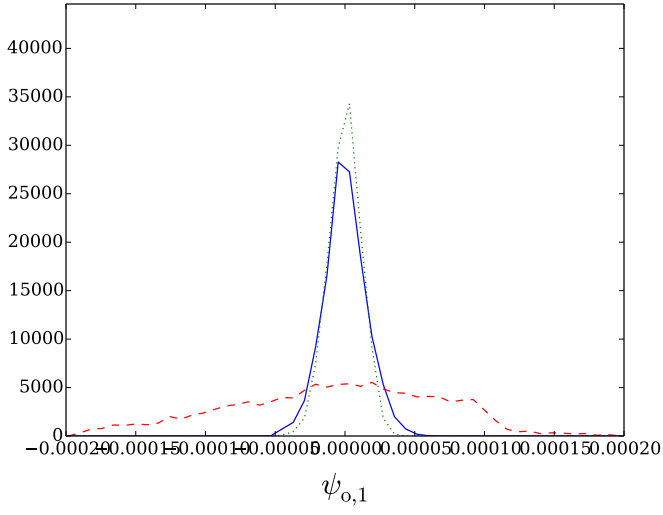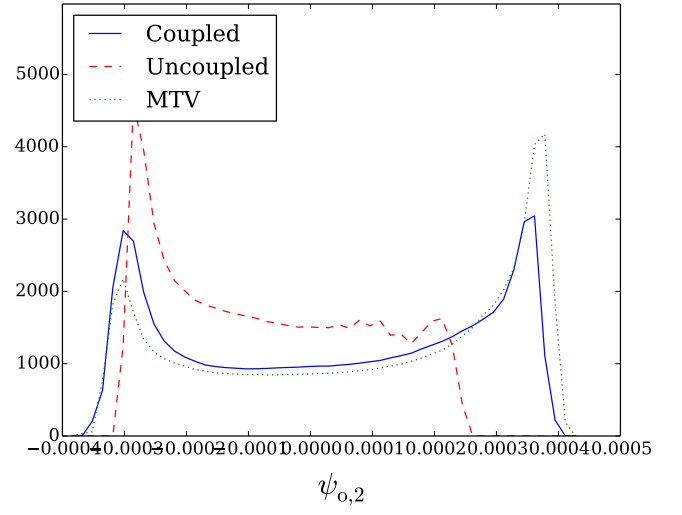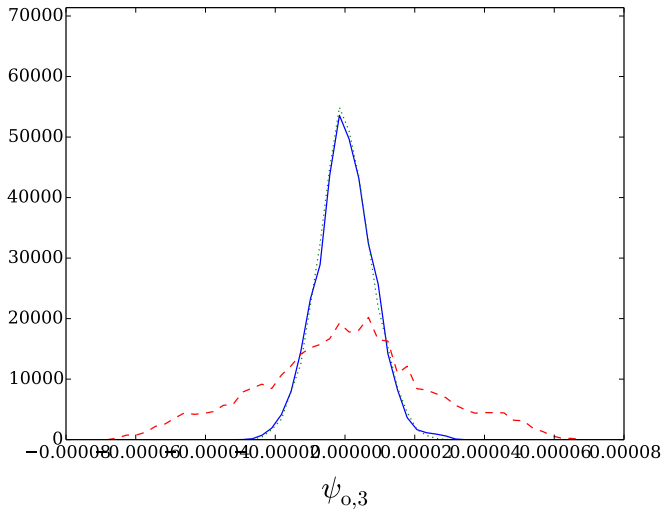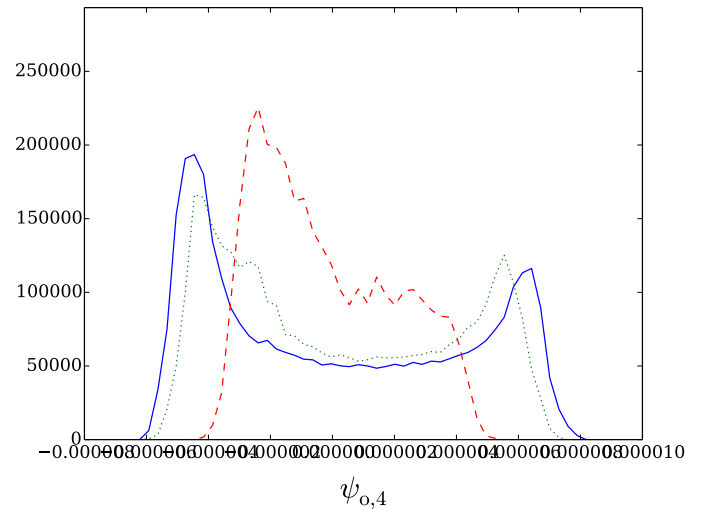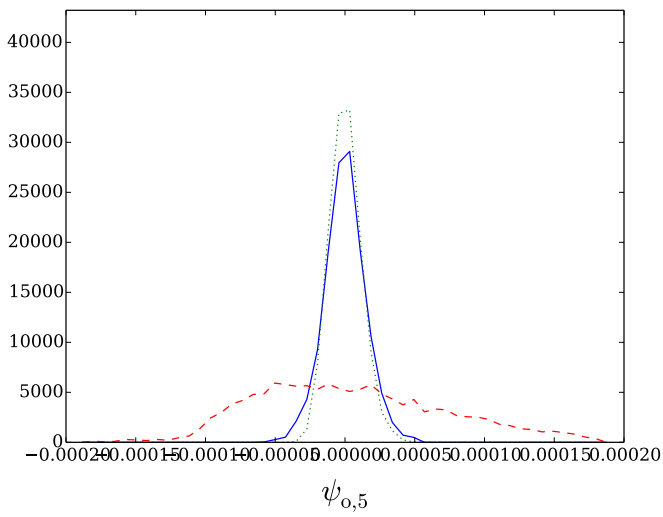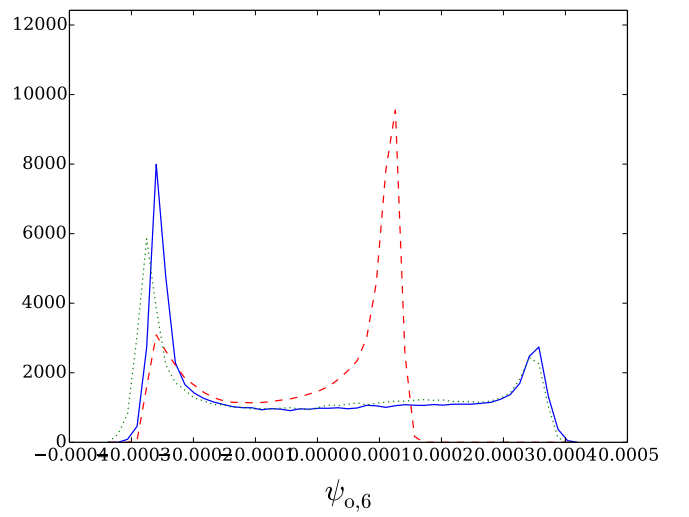

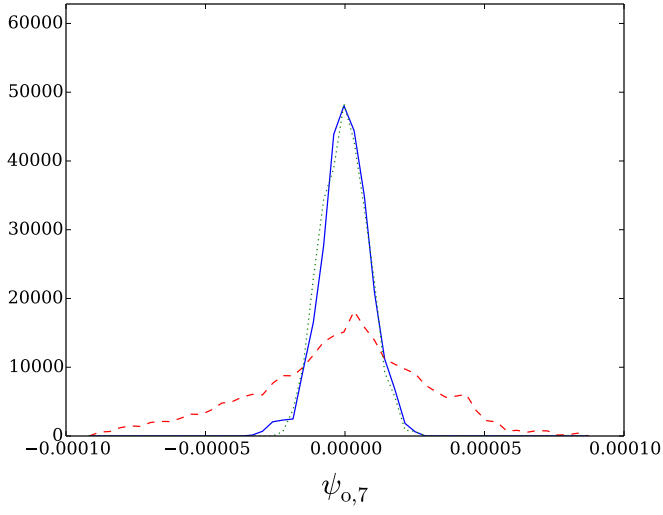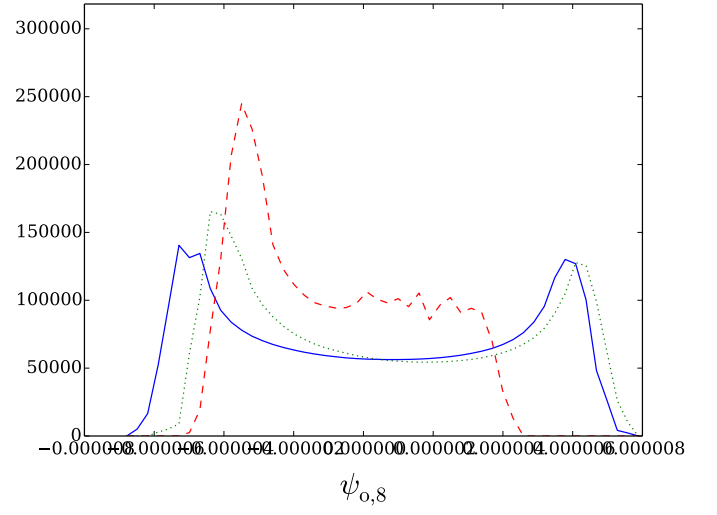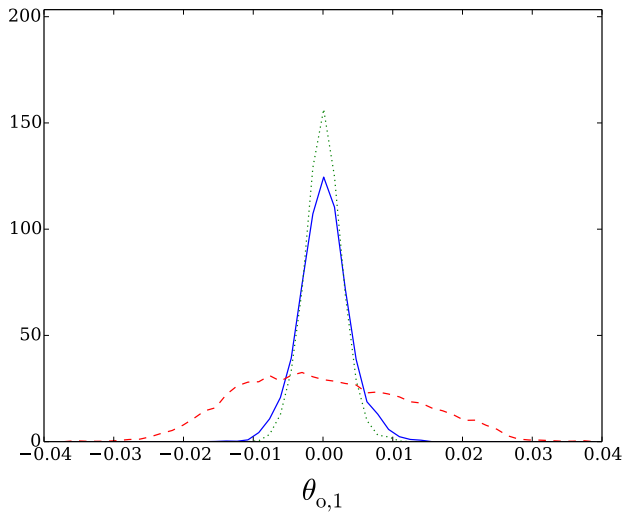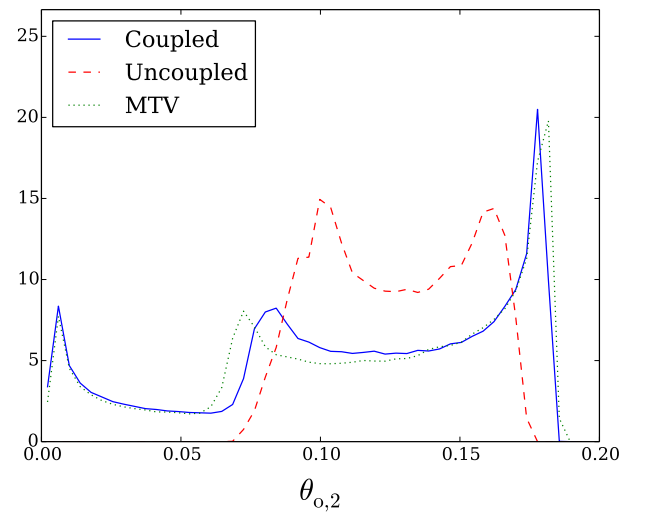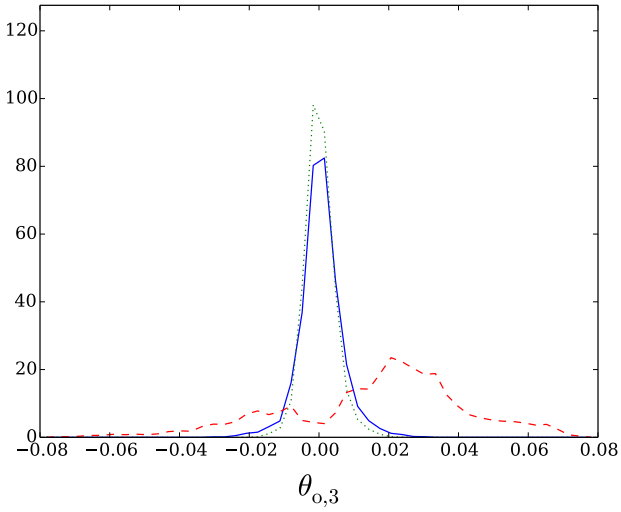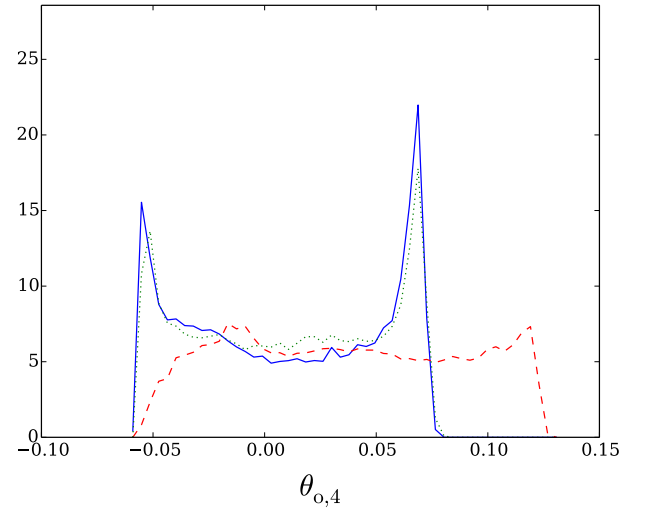

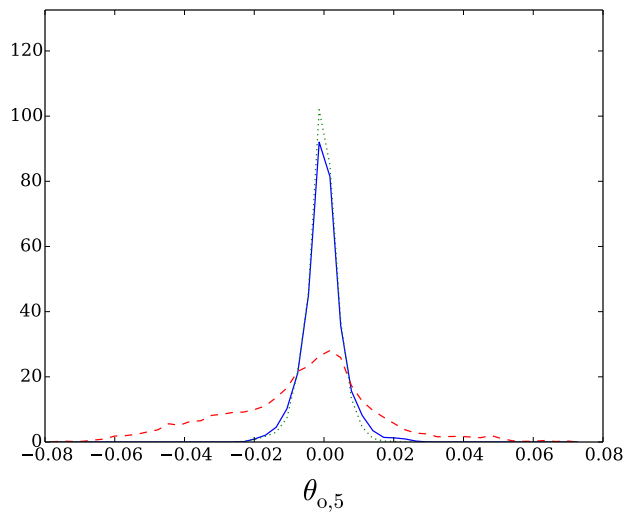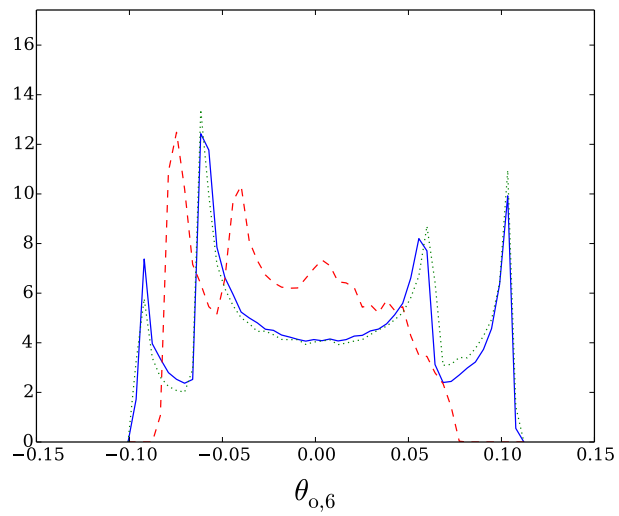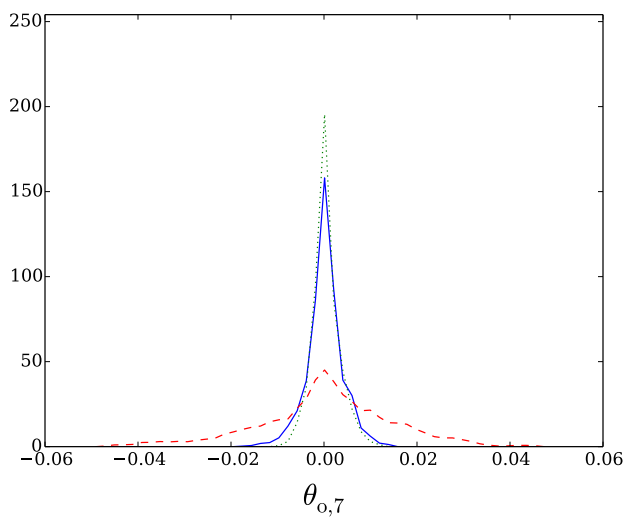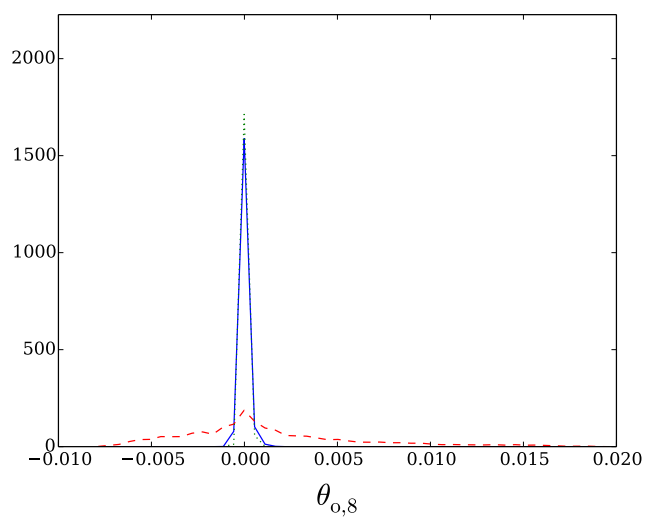

## 1.2.2 Kullback-Leibler divergences

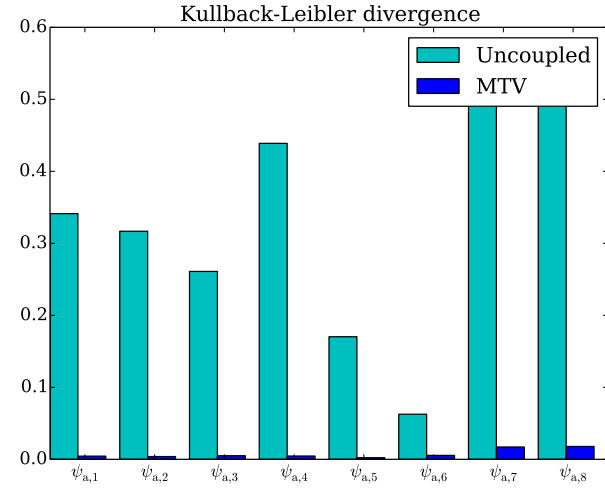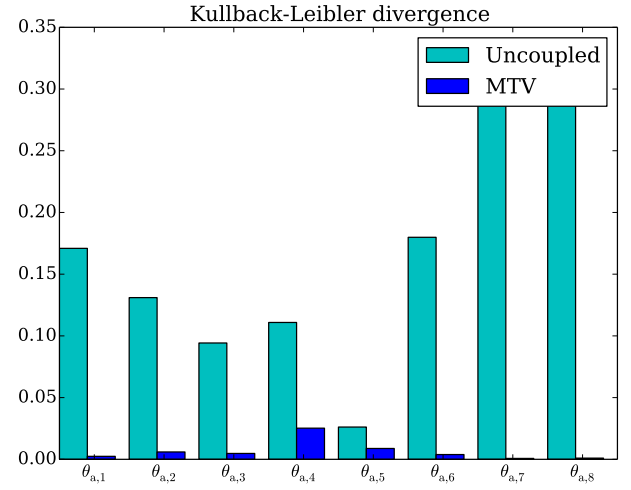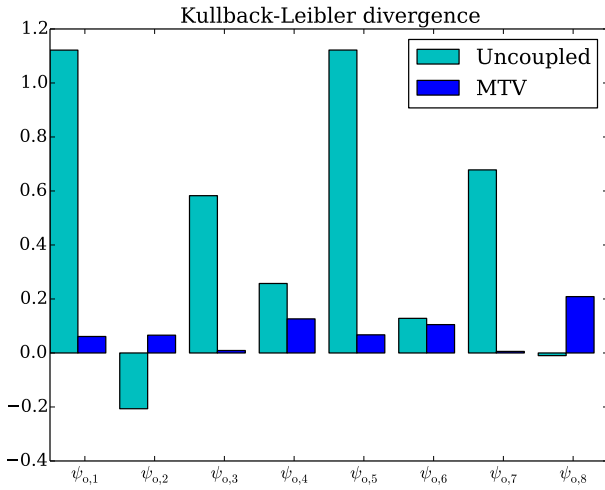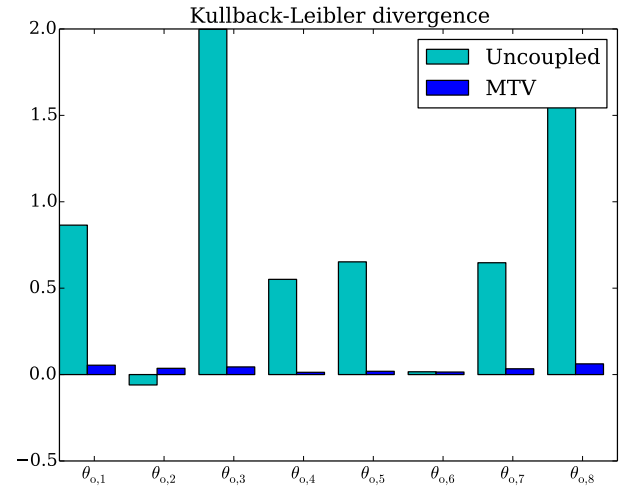

## 1.3 noLFV parameter set

### 1.3.1 PDFs and autocorrelation functions of the resolved variables

Atmospheric variables of the model.

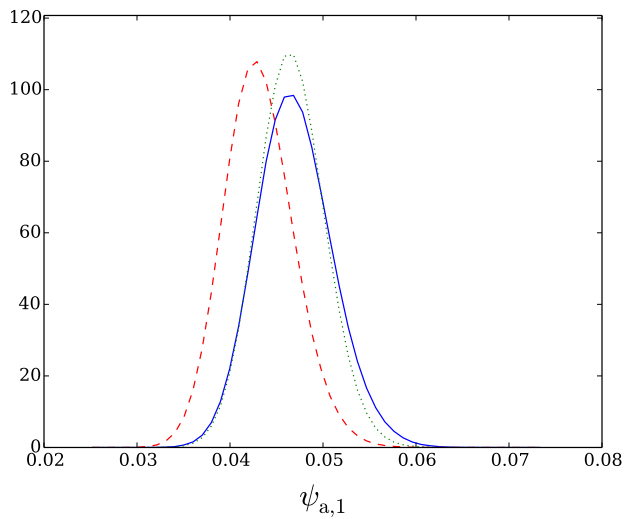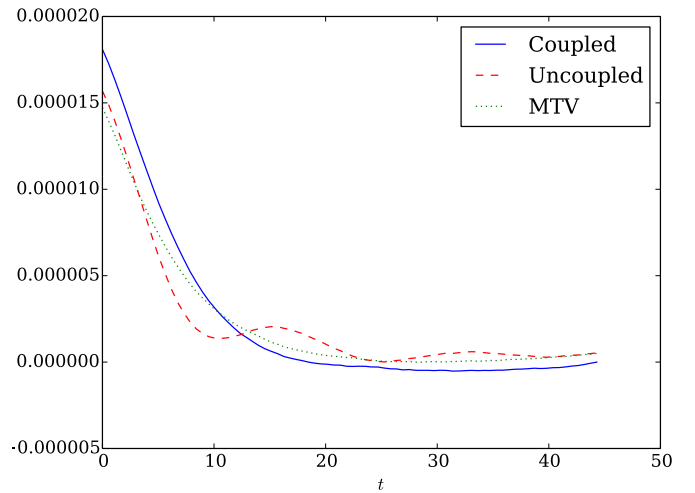

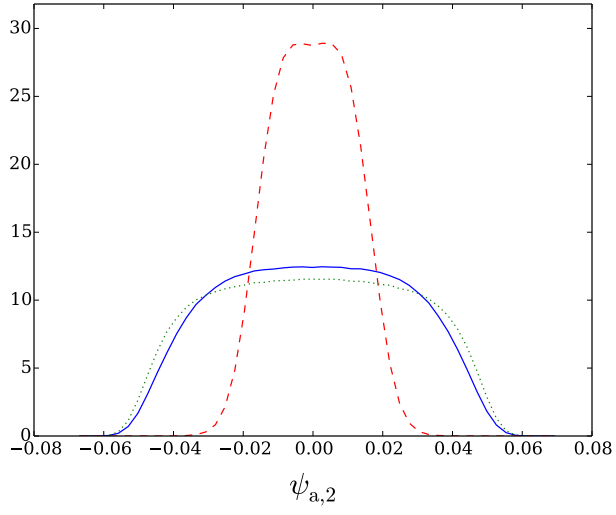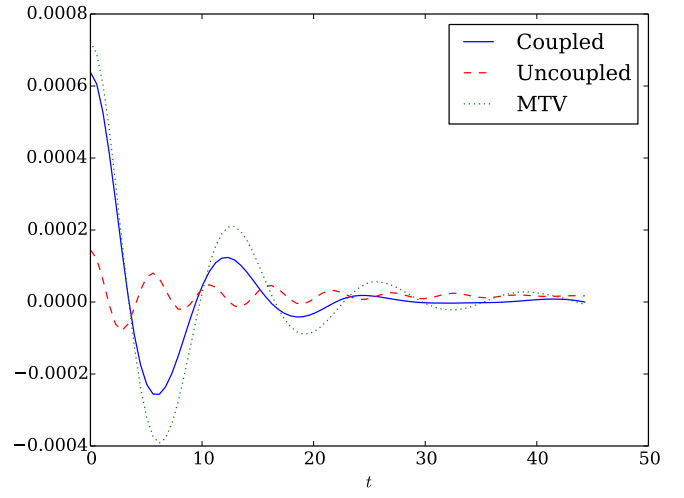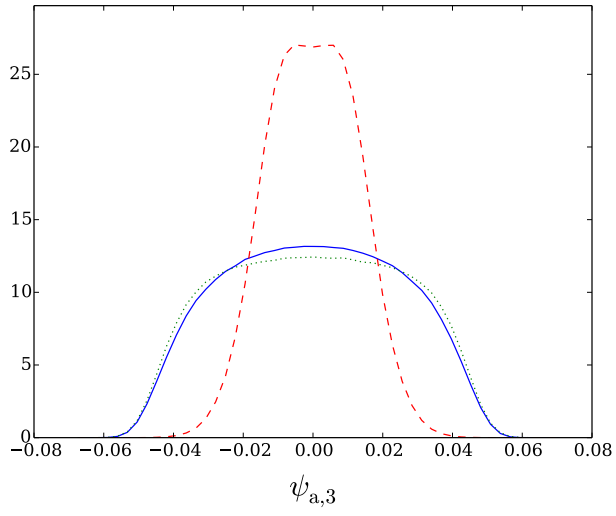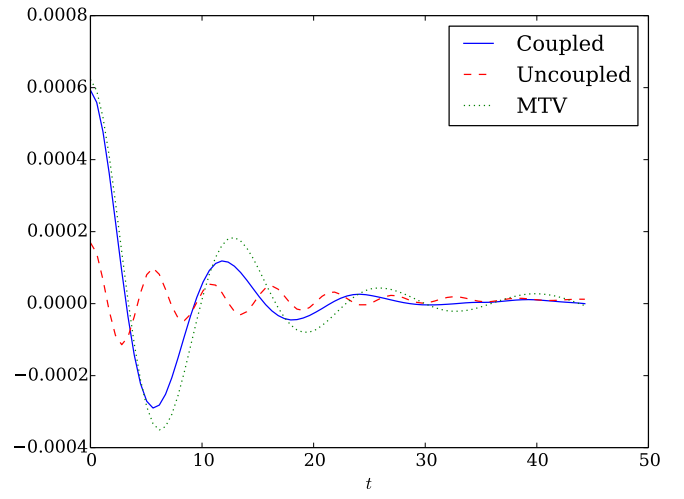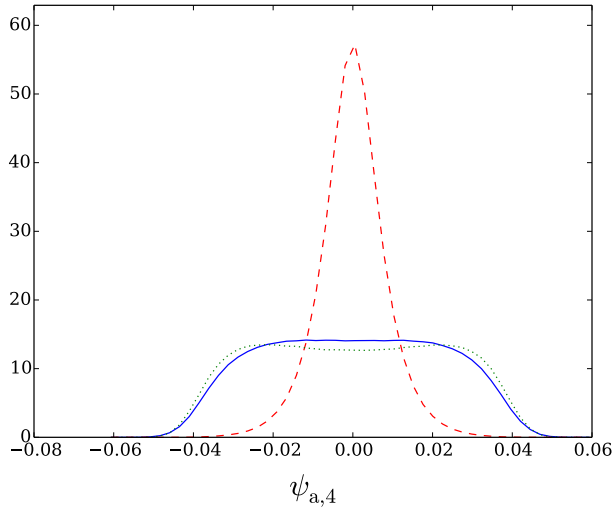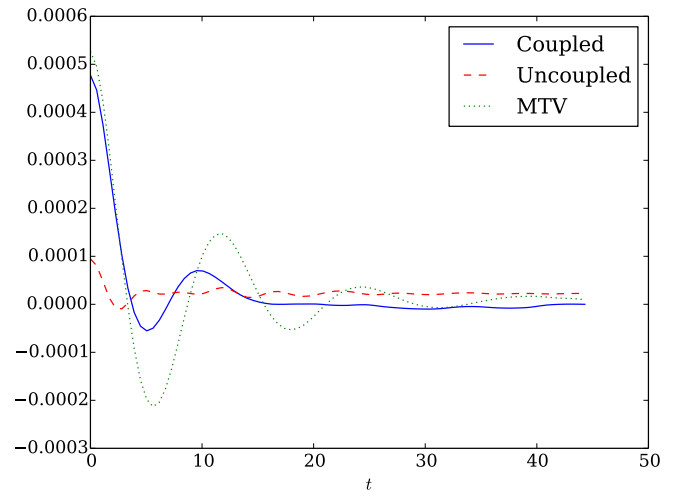

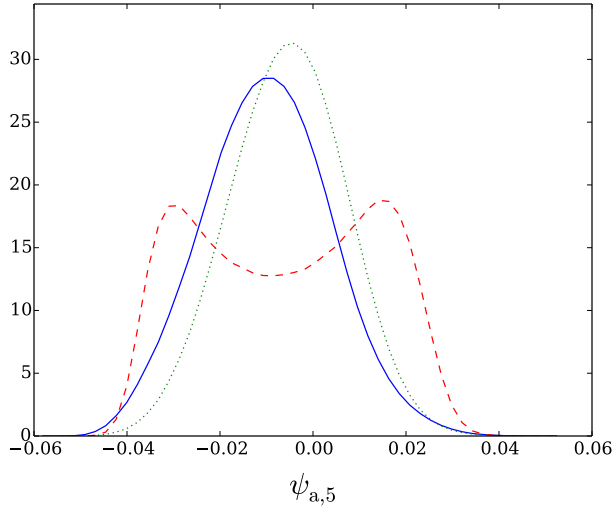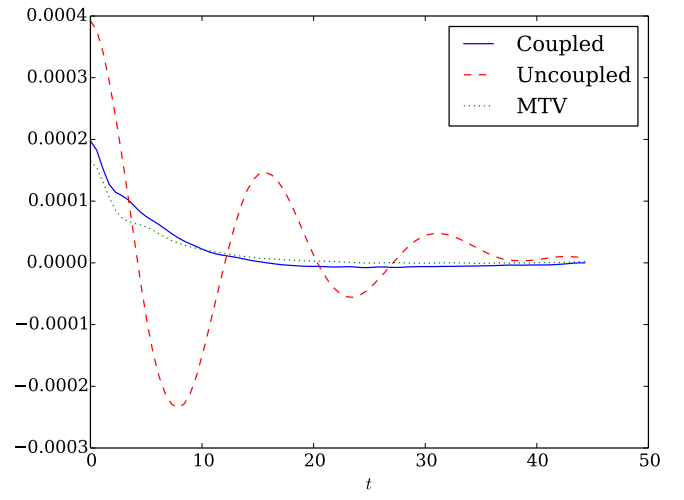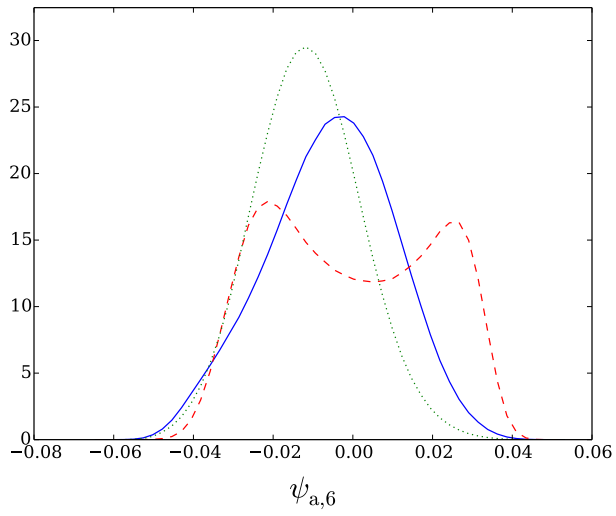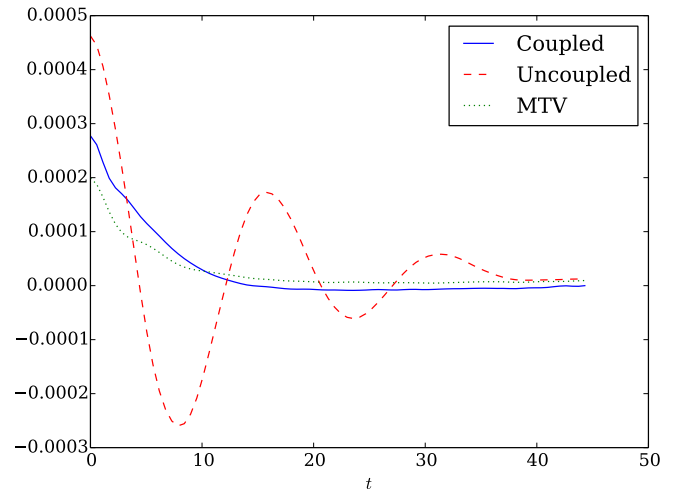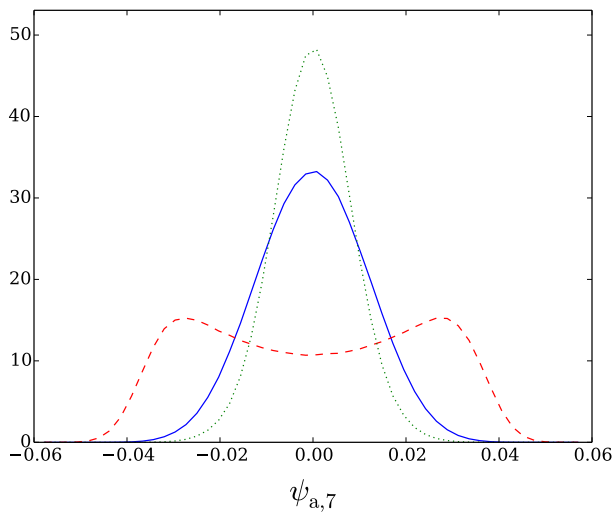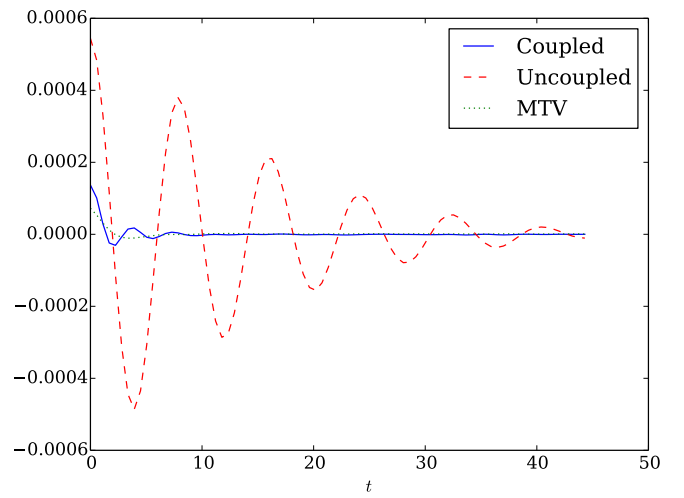

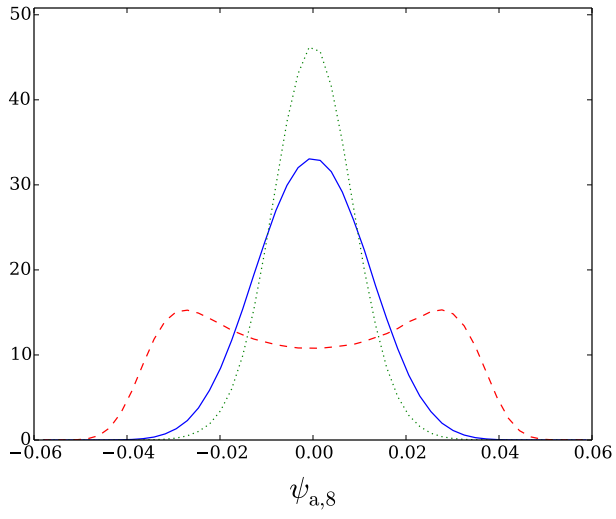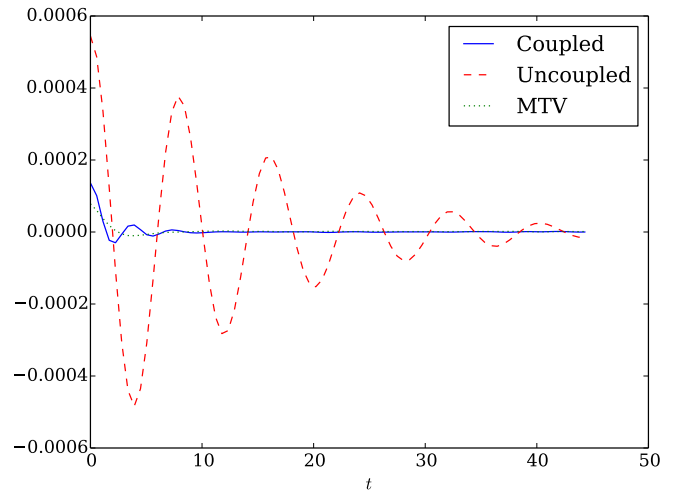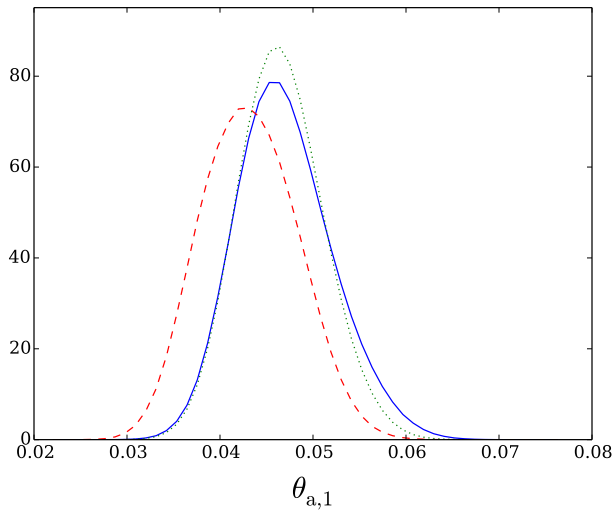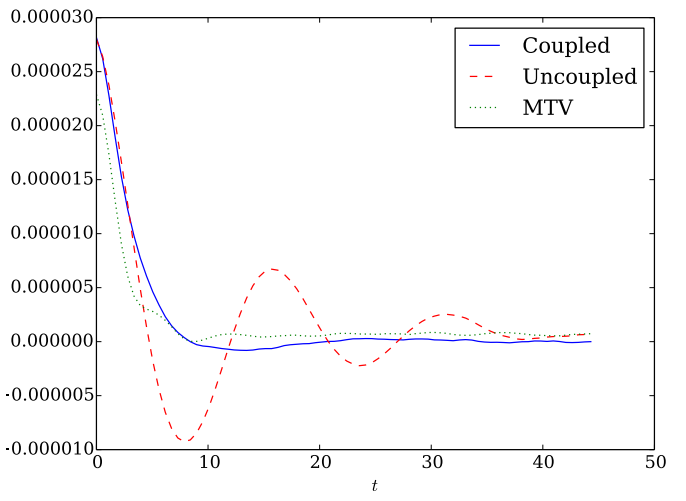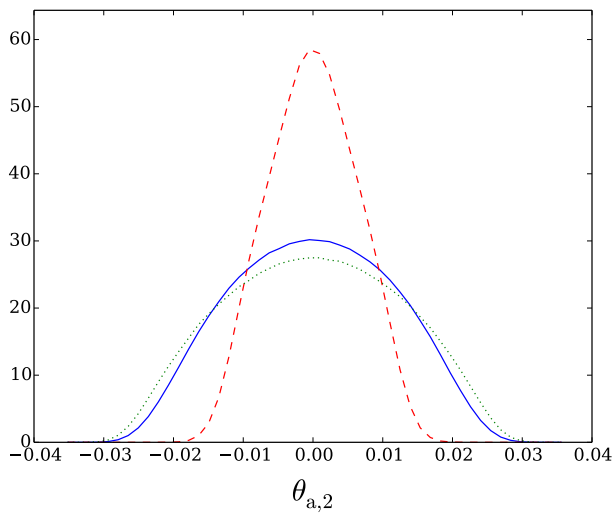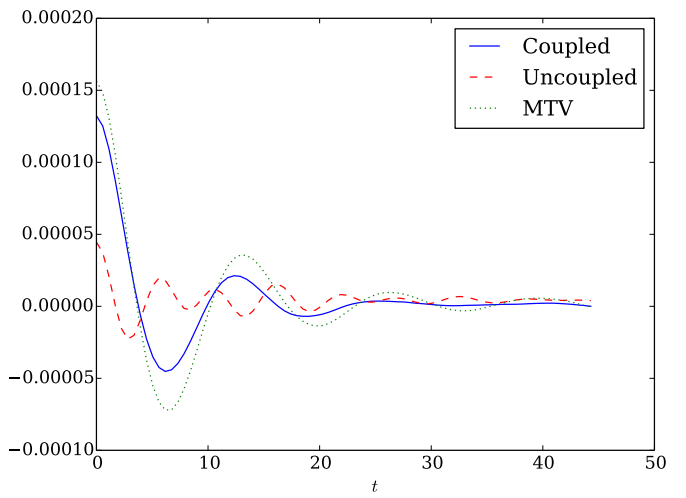

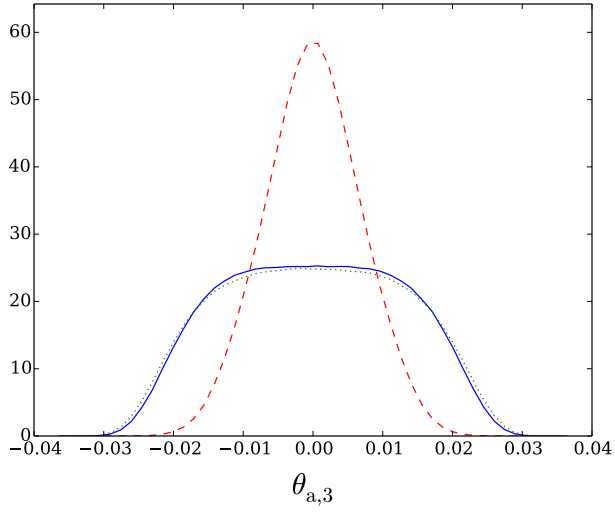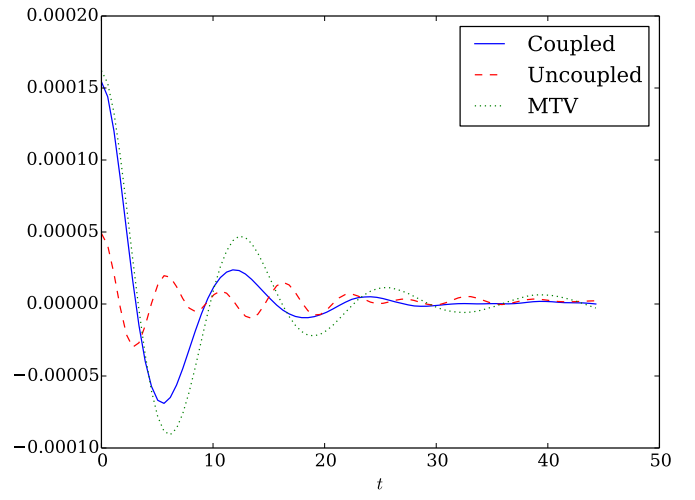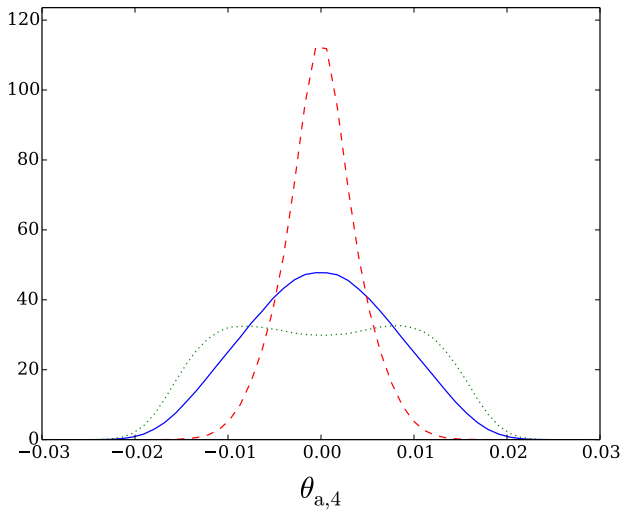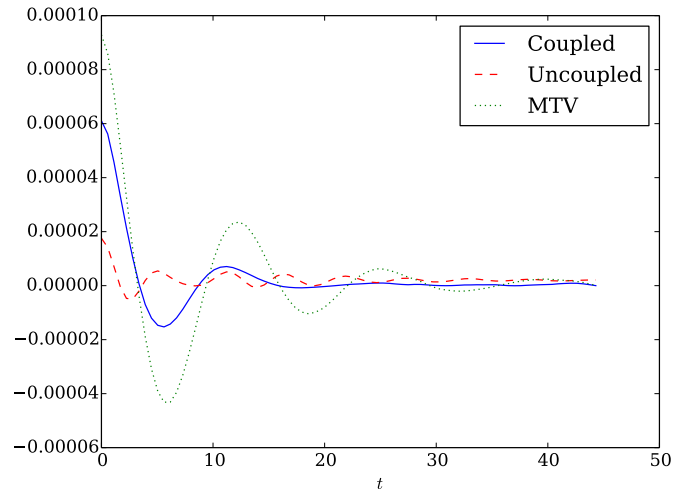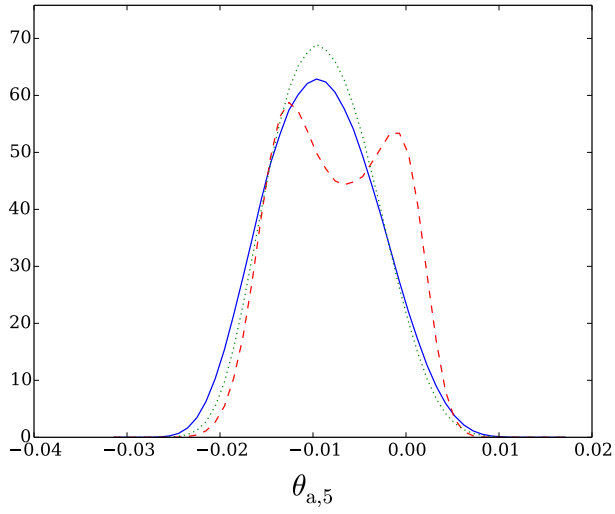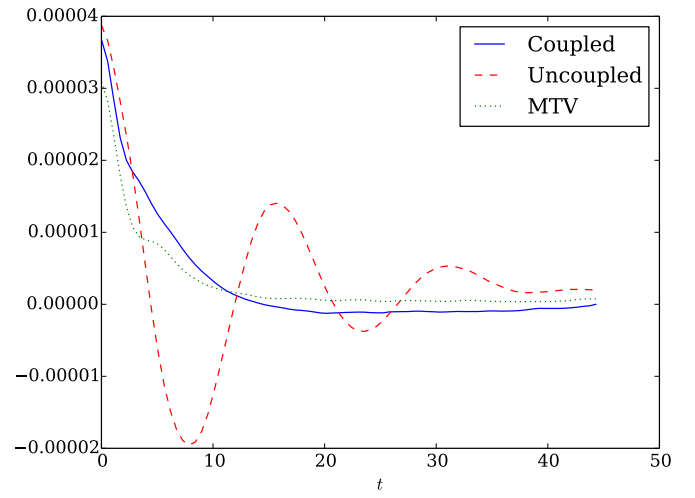

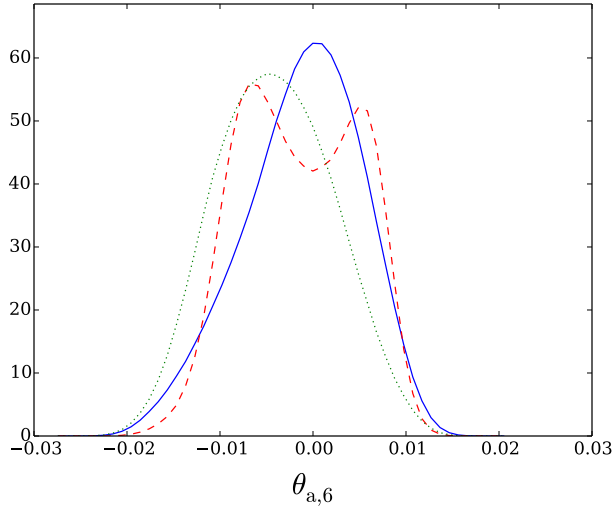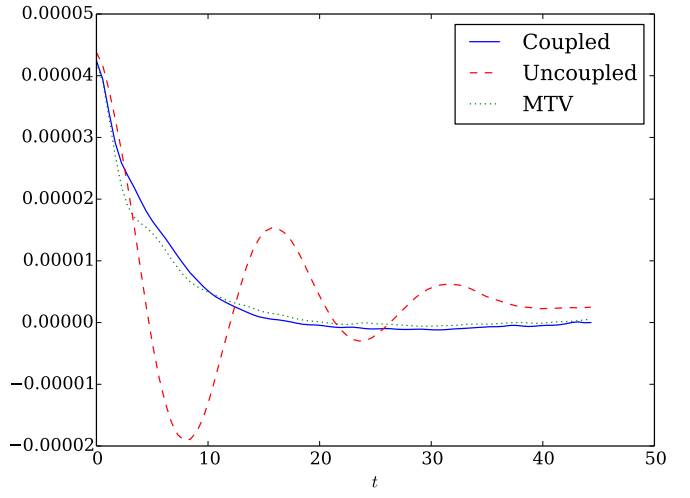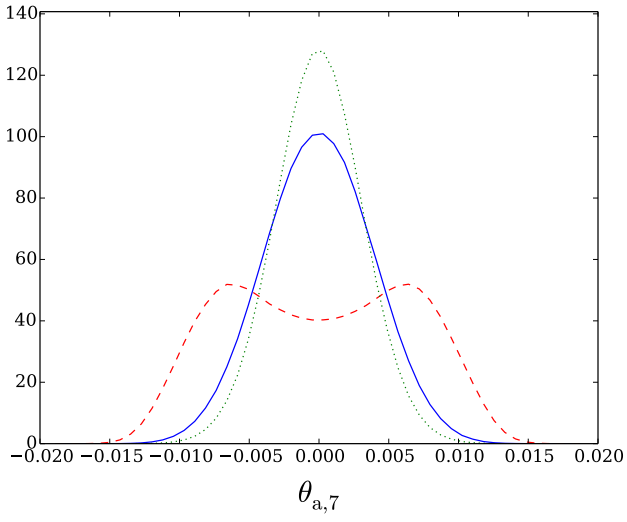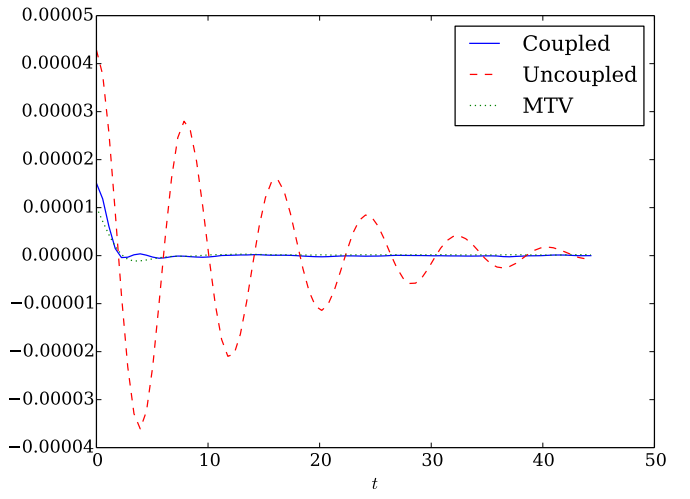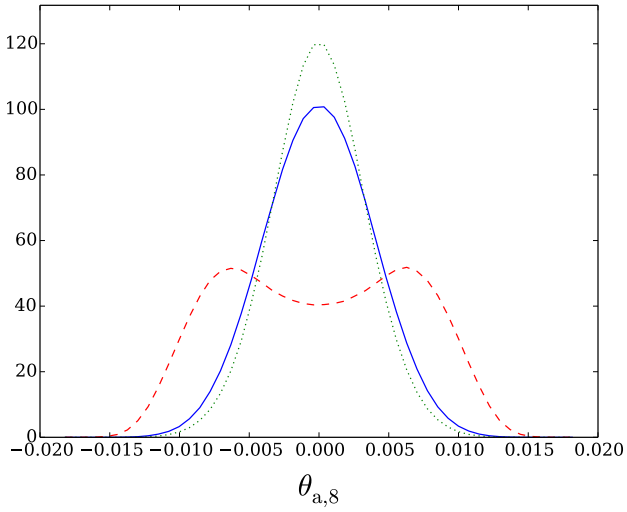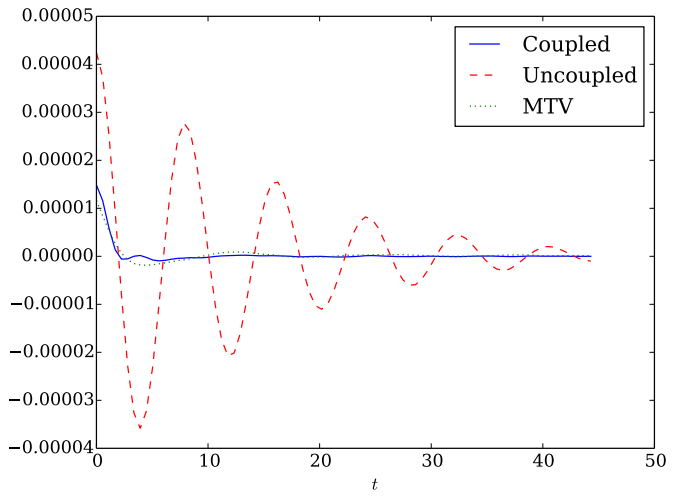

**Oceanic variables** Only the PDFs are available for these variables.

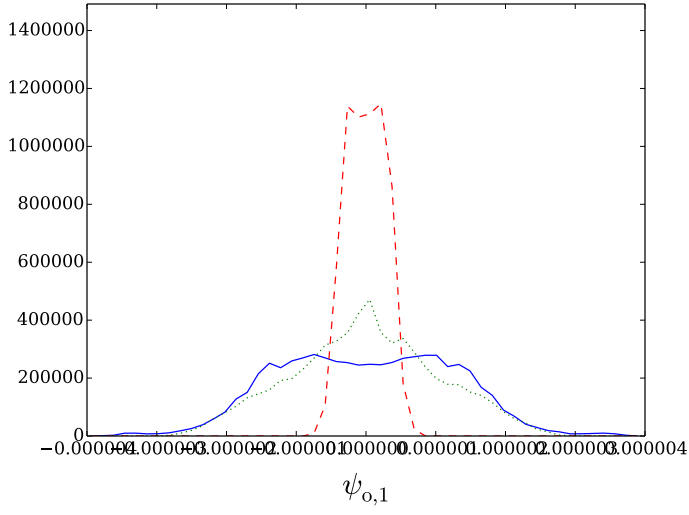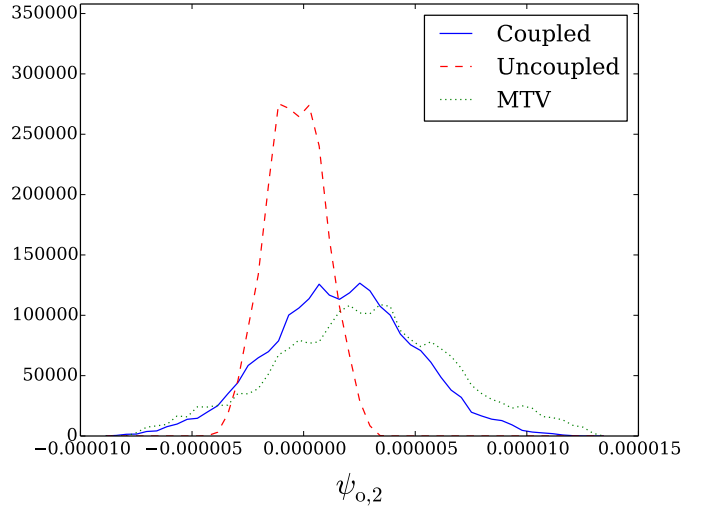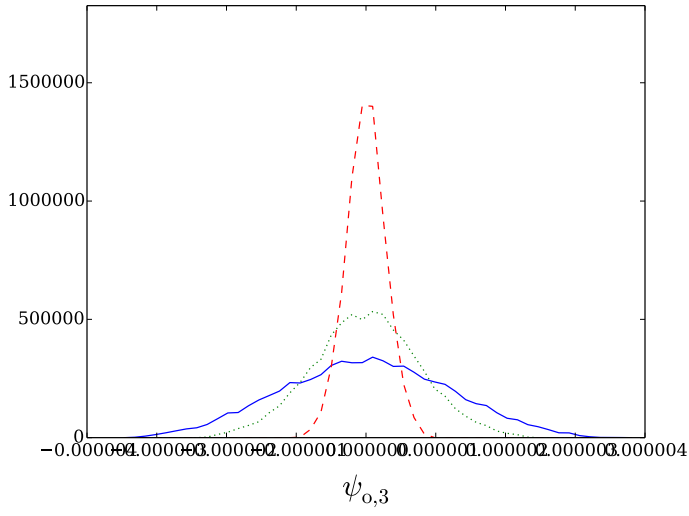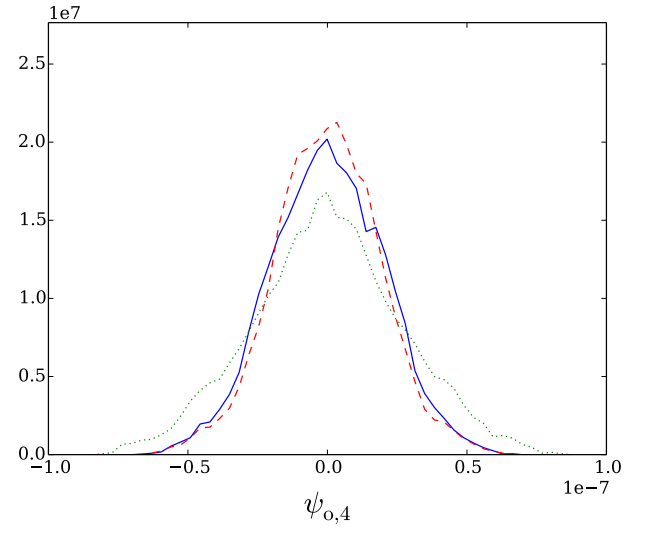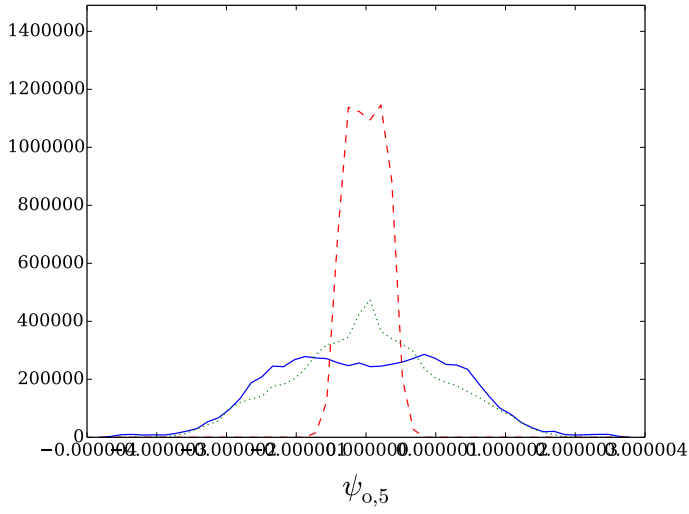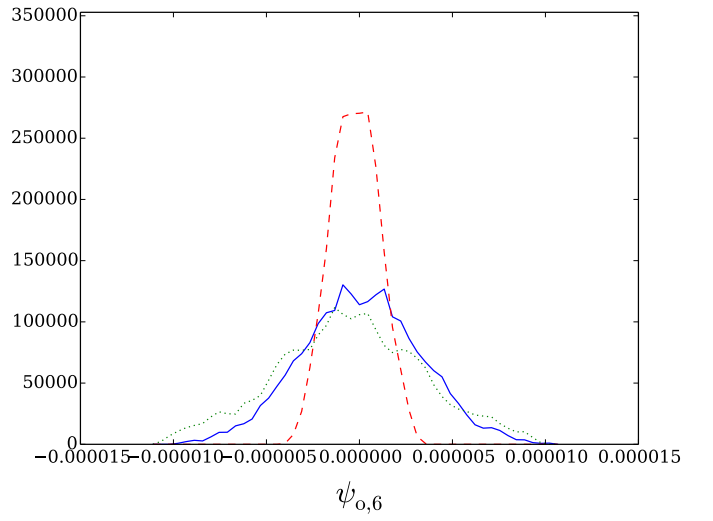

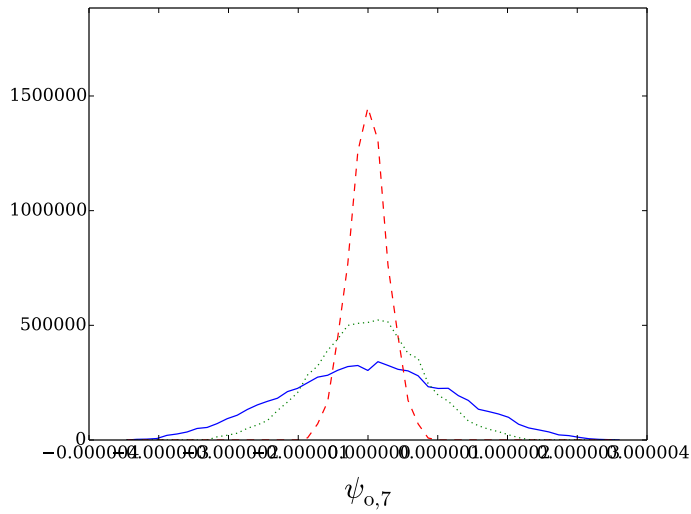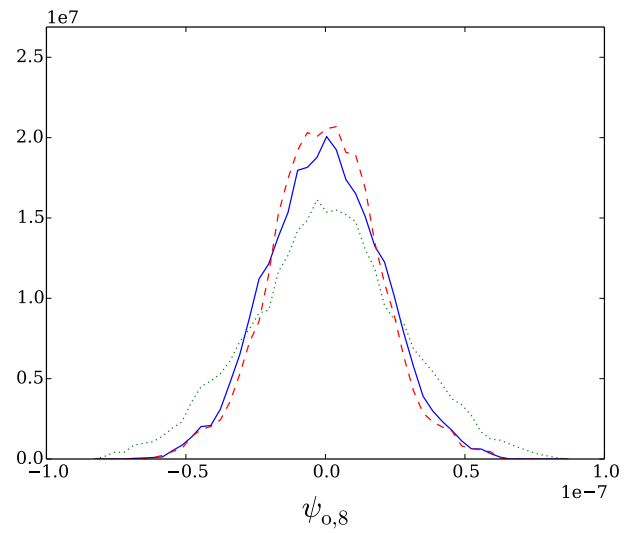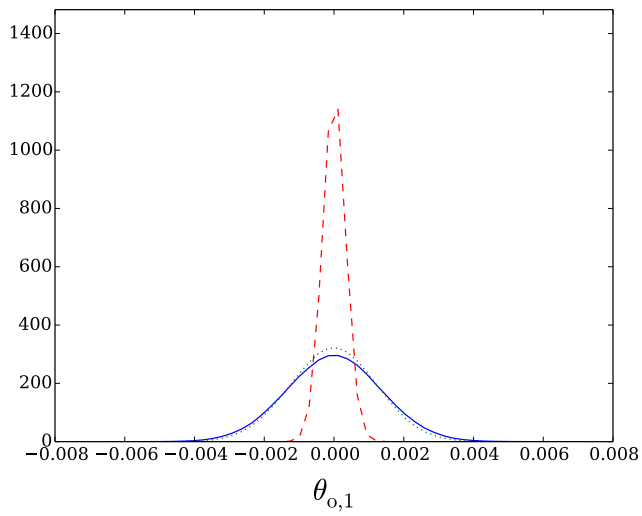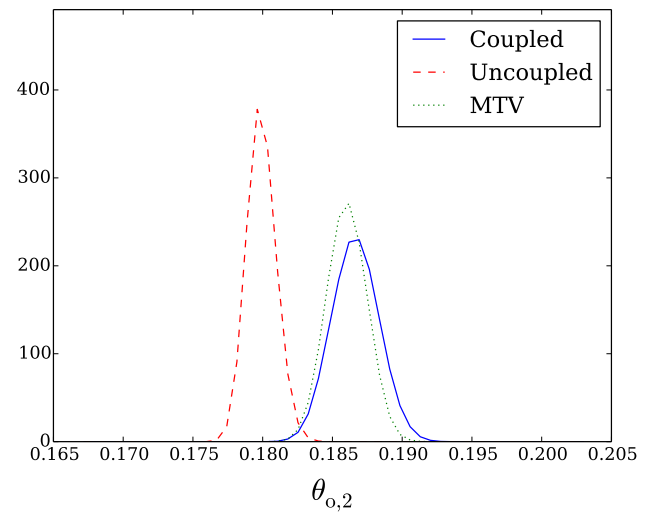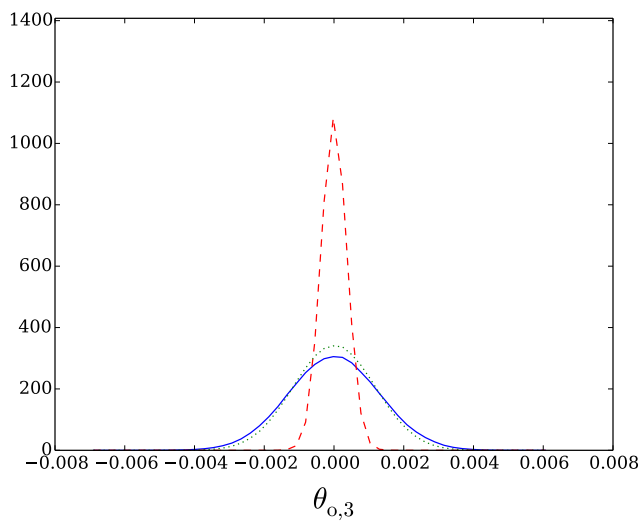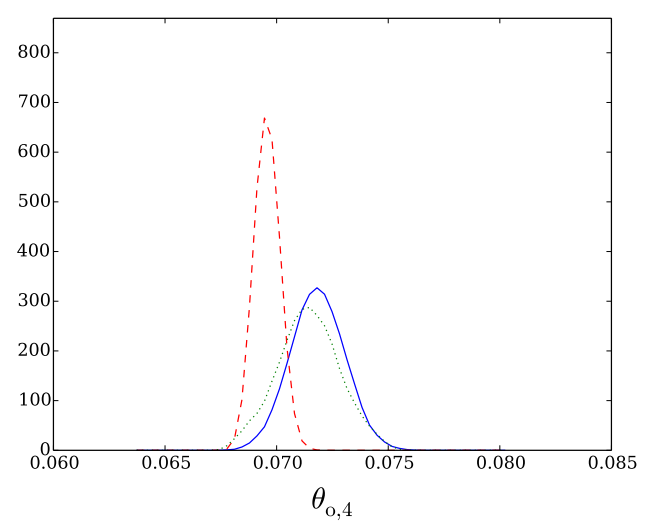

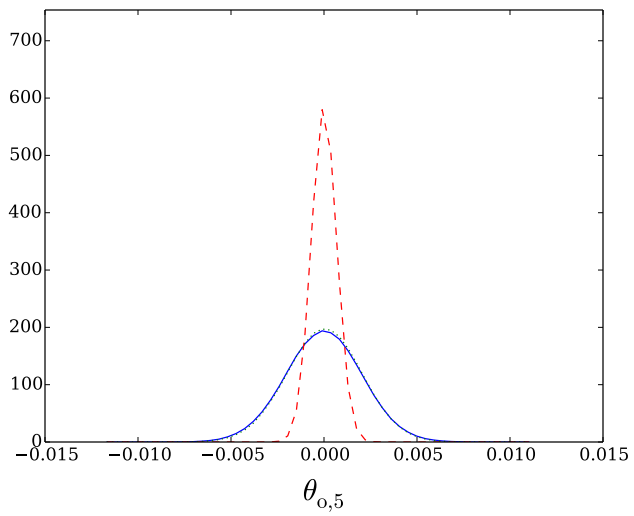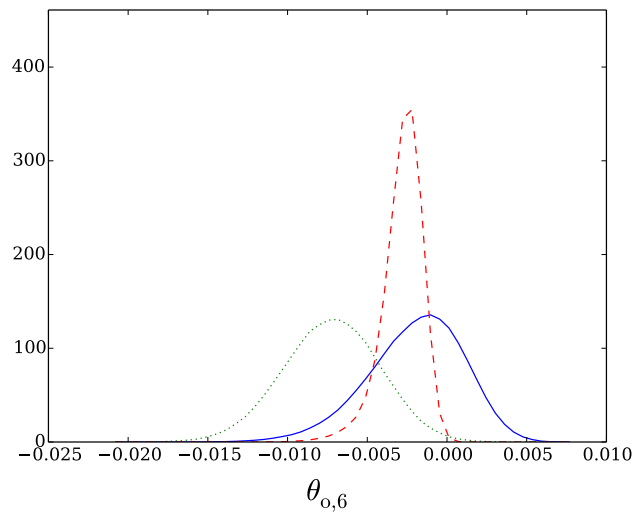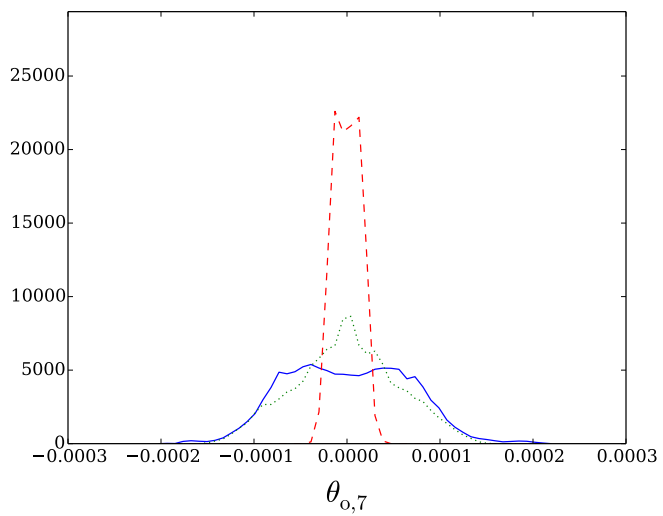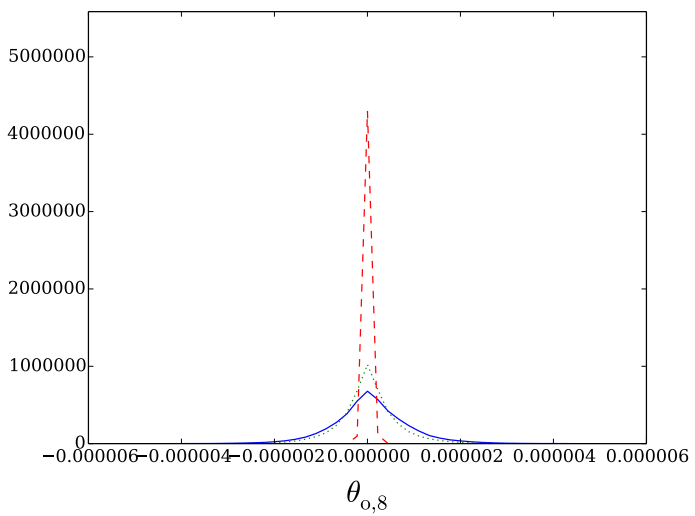

### 1.3.2 Kullback-Leibler divergences

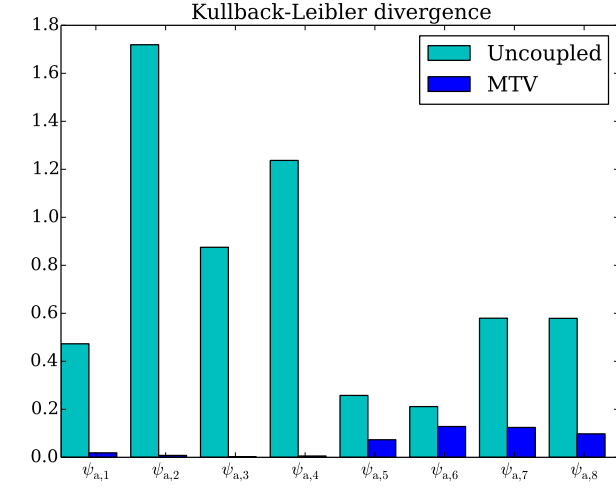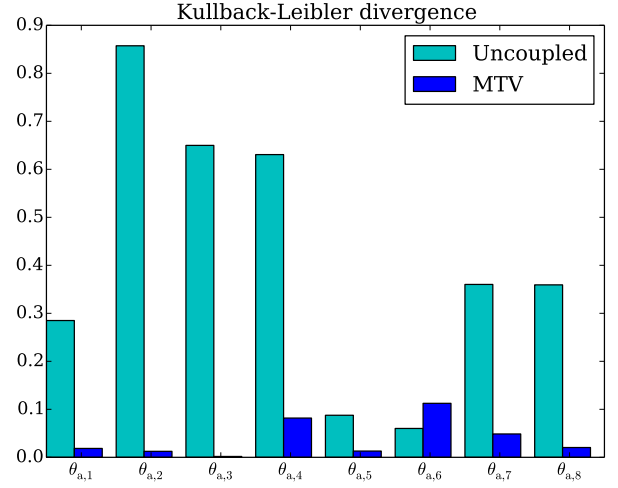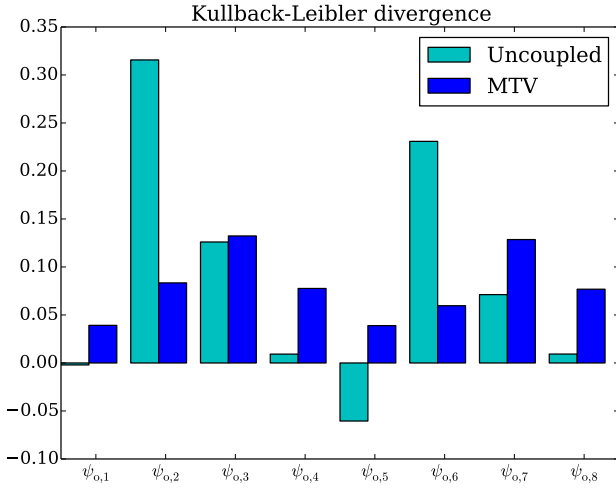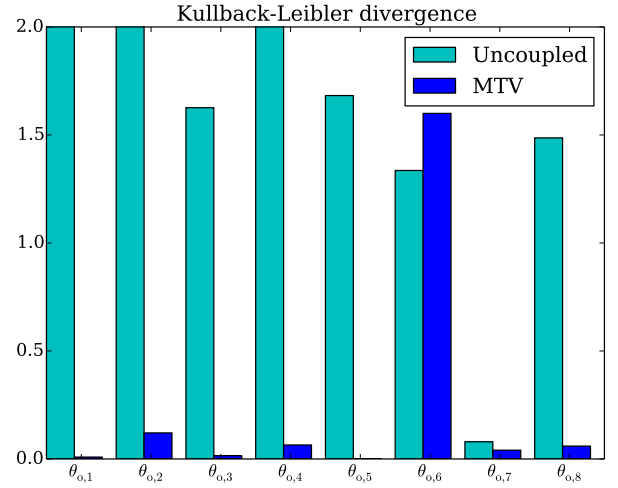

## 2 Parameterization of the wavenumber 2 atmospheric baroclinic variables

All the figures compiled in this section are related to the experiment described in the section 4.1.3 and concern the “DV2017”, “DDV2016” and “noLFV” parameter sets.

### 2.1 DV2017 parameter set

#### 2.1.1 PDFs and autocorrelation functions of the resolved variables

Atmospheric variables of the model.

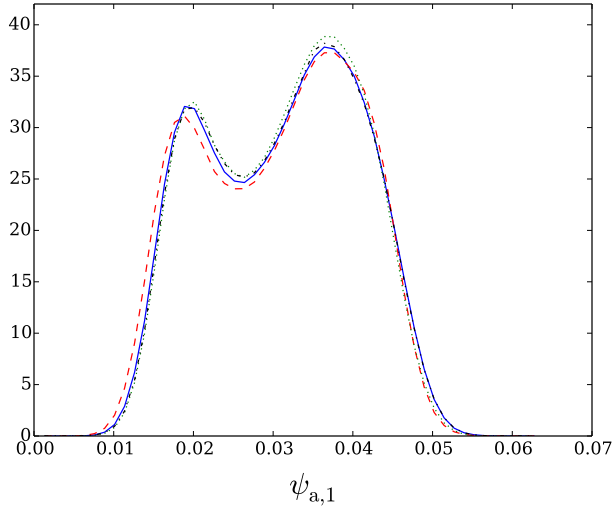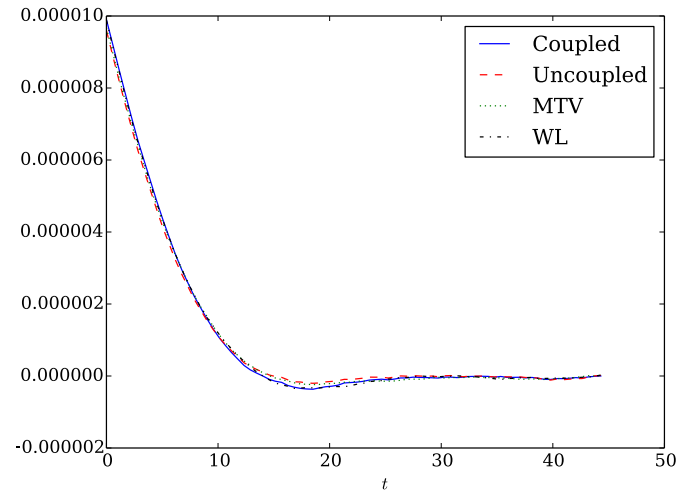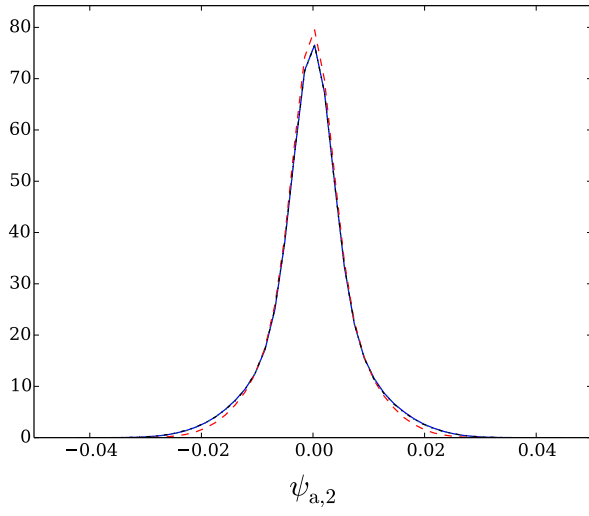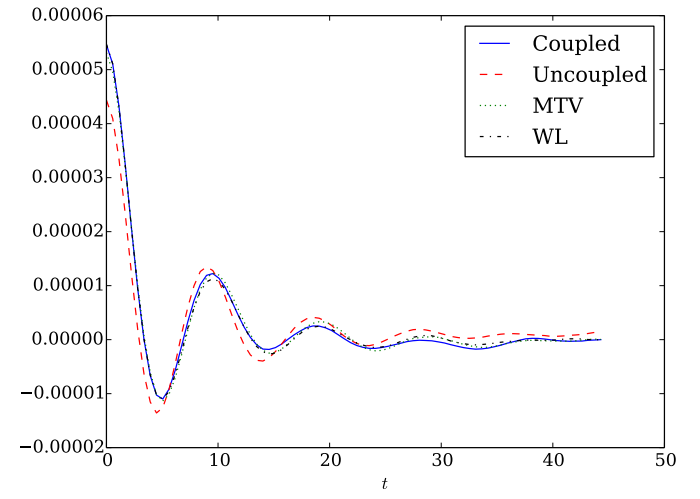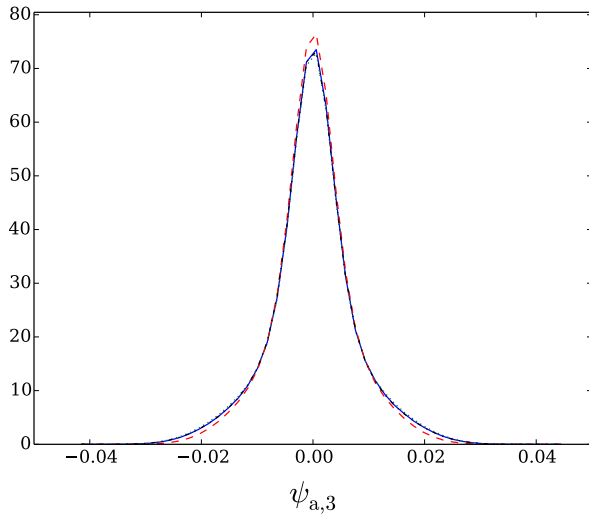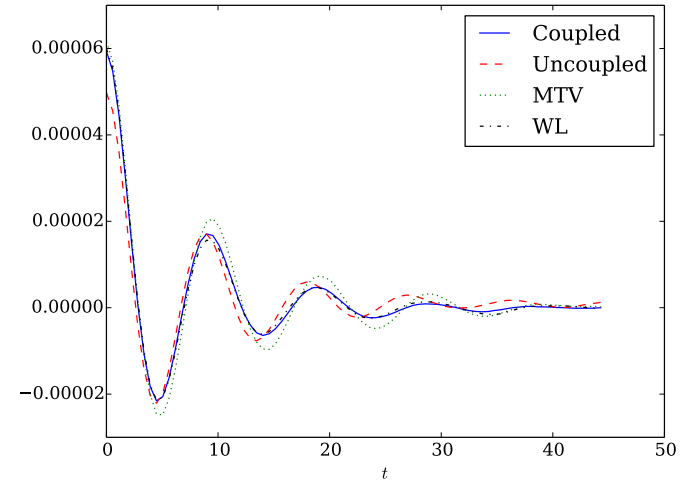

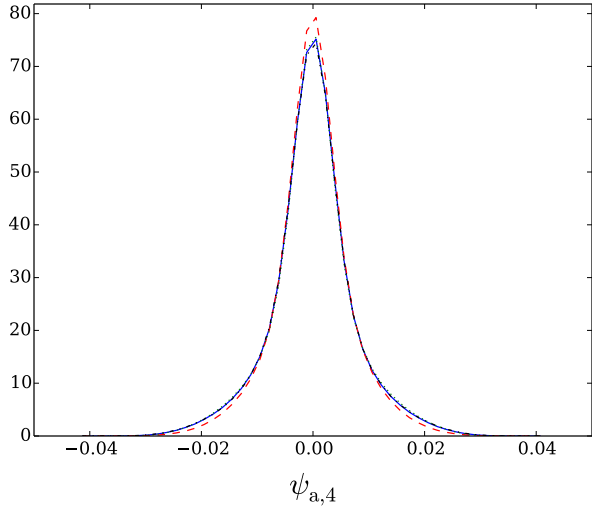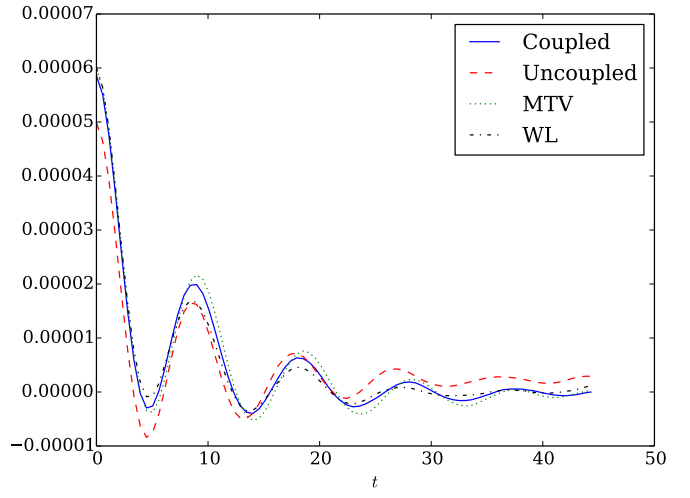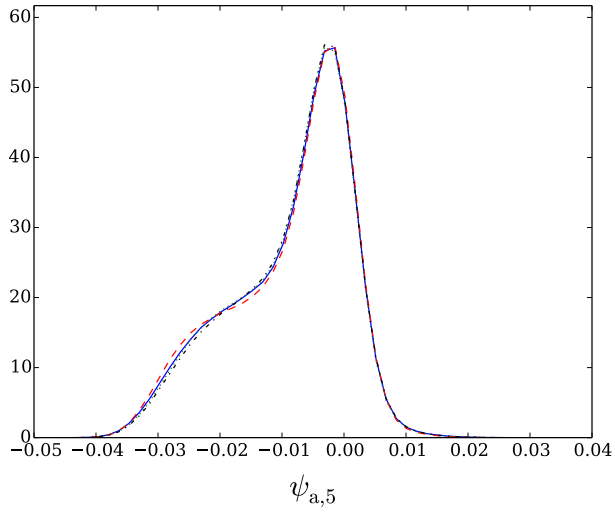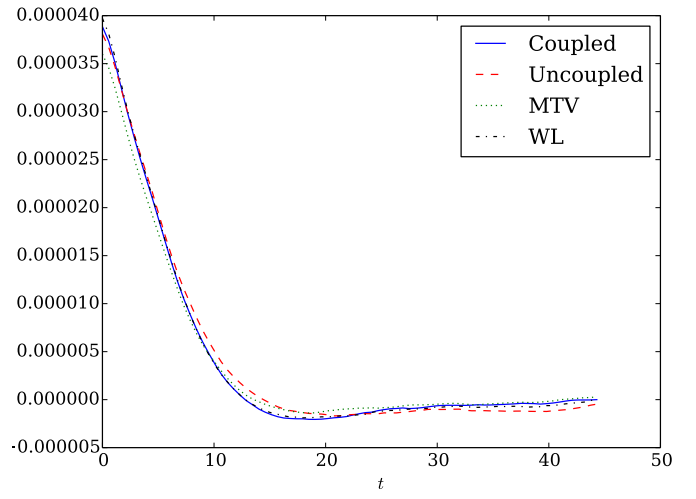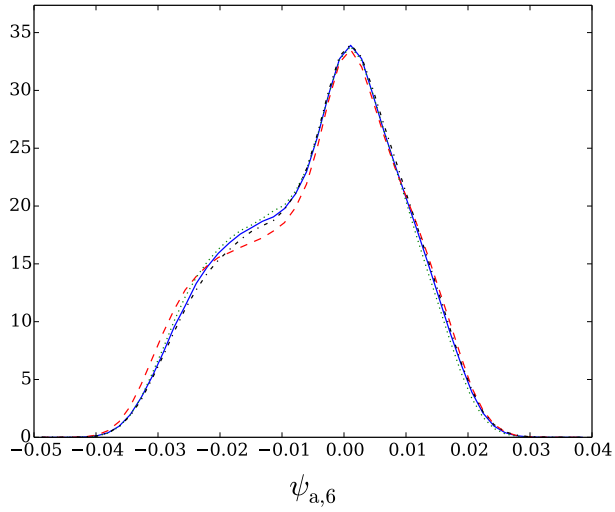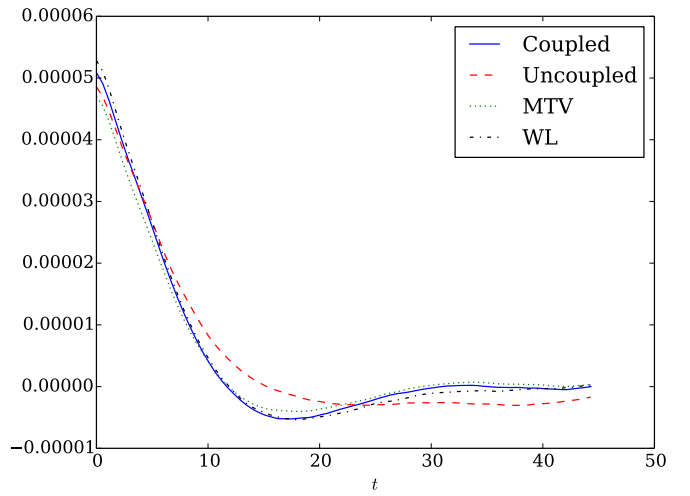

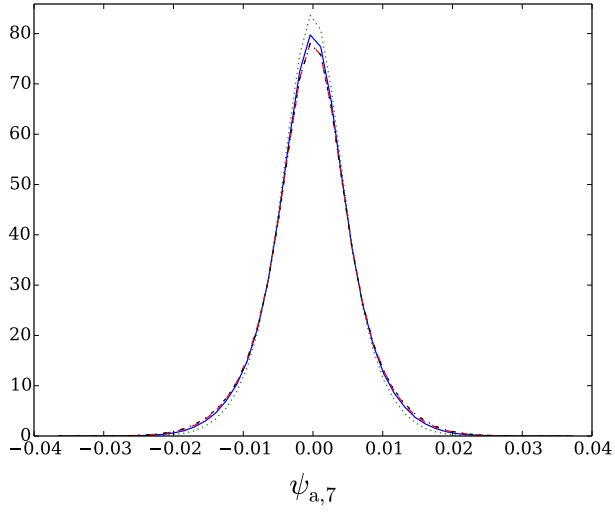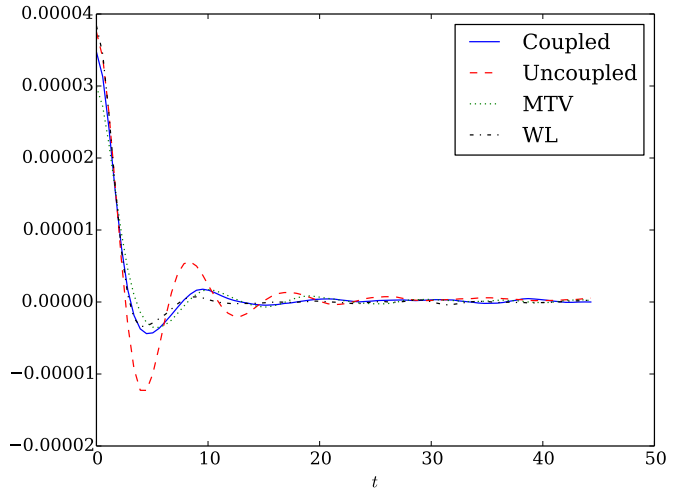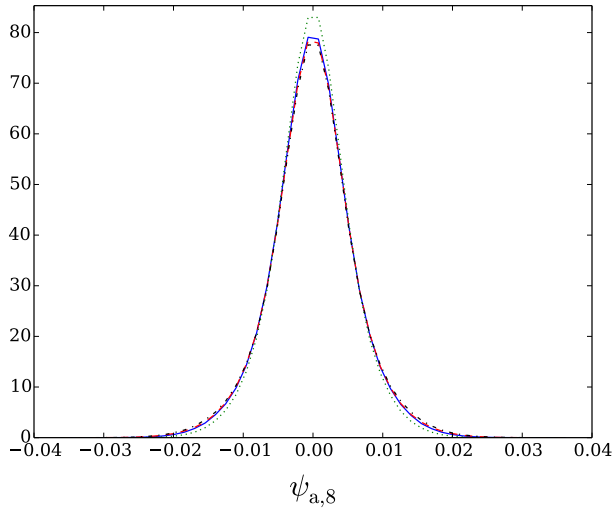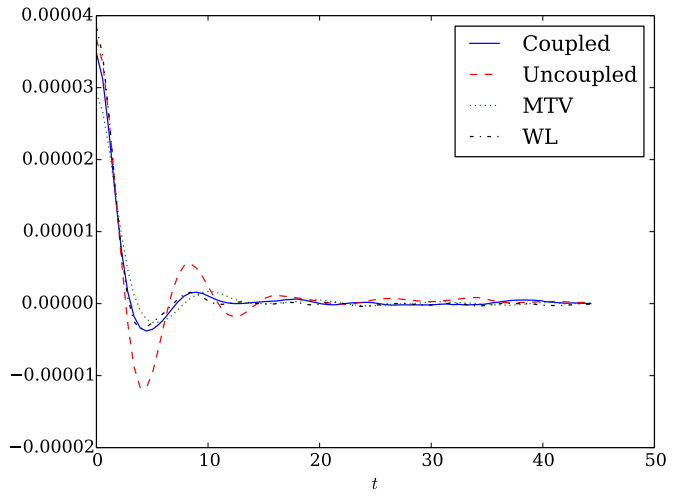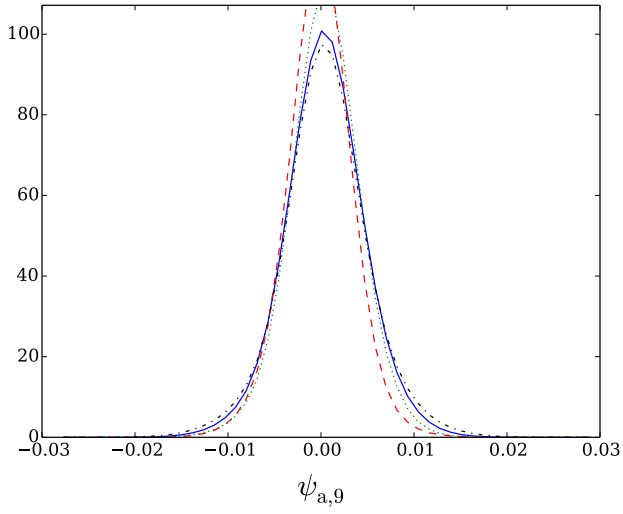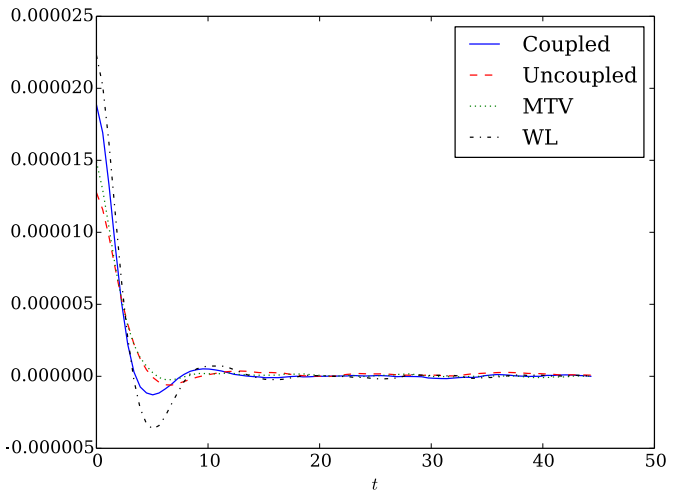

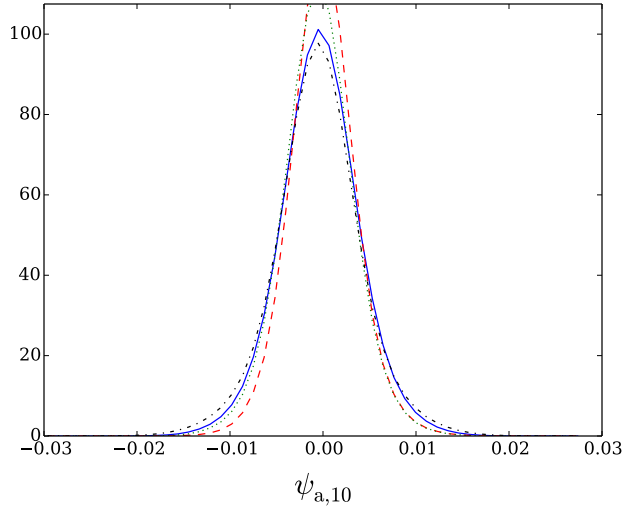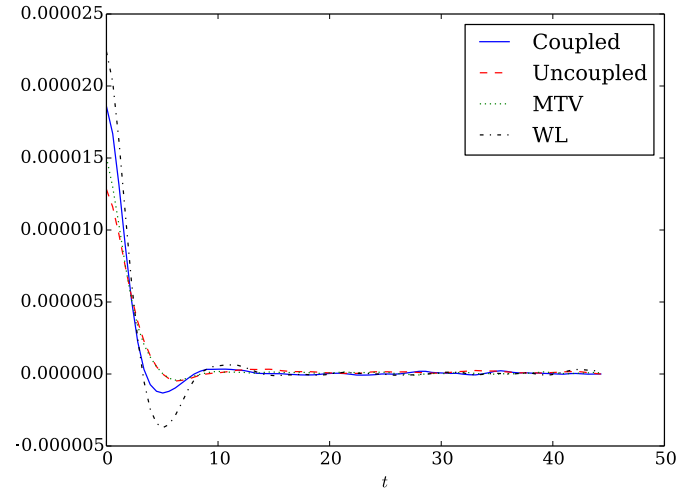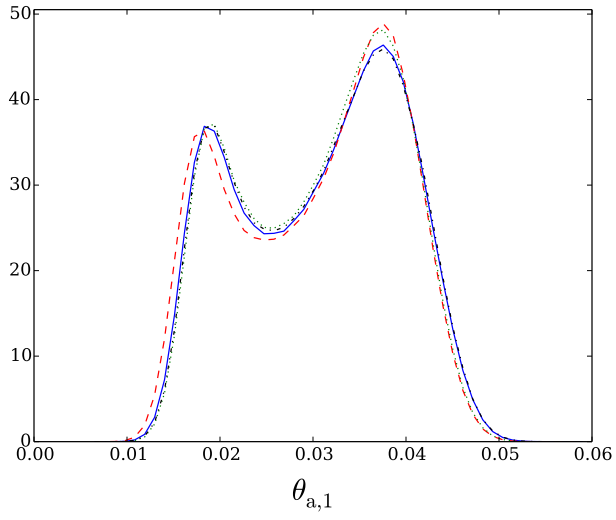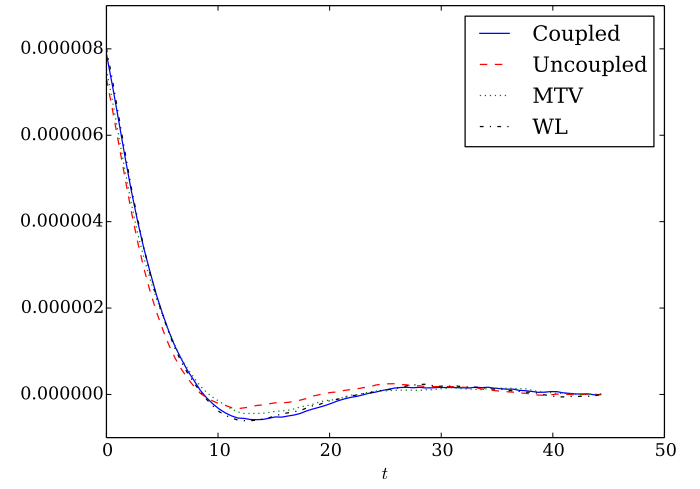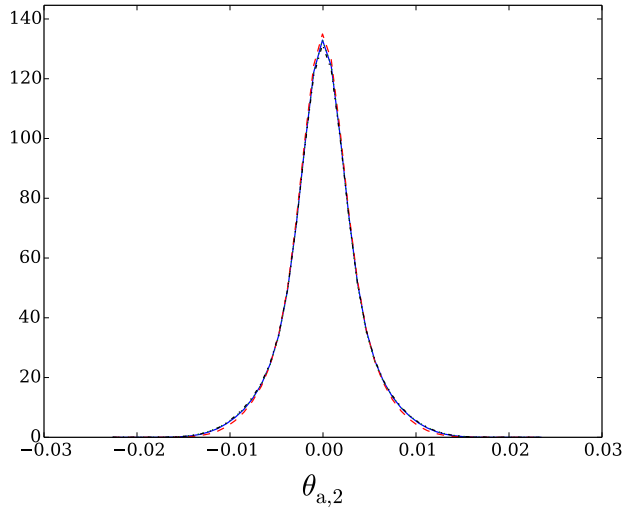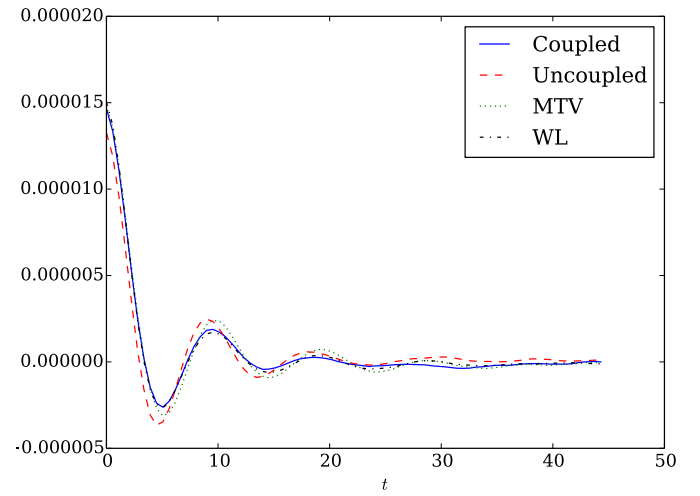

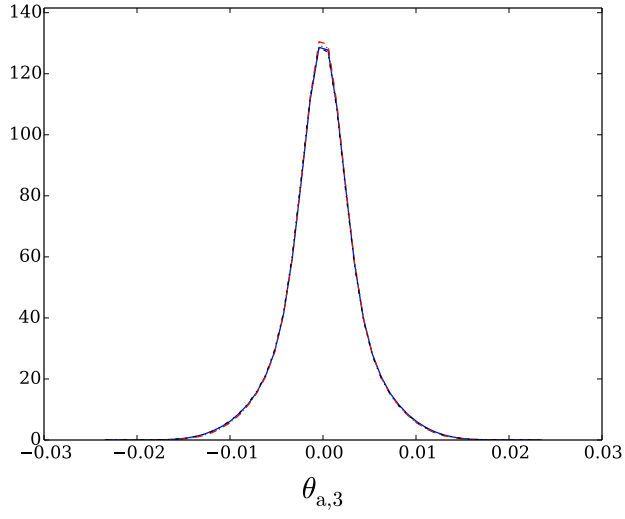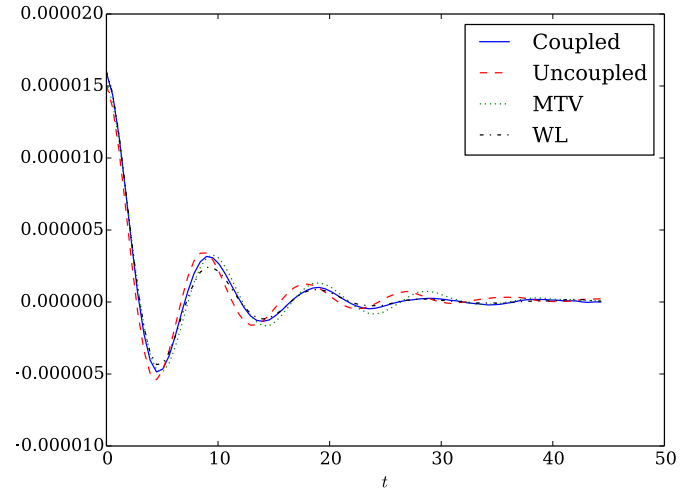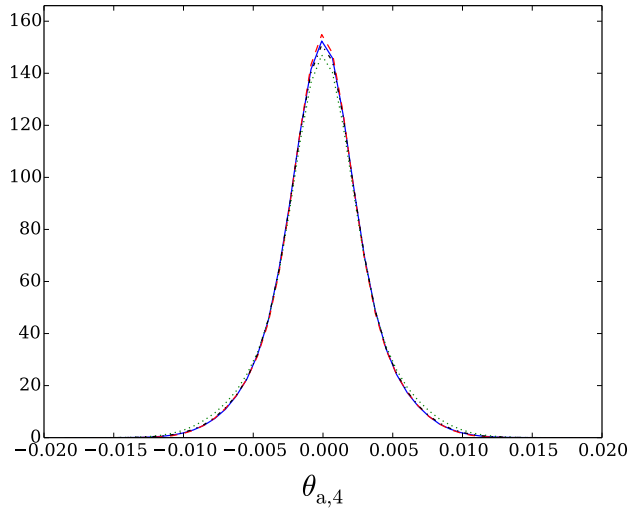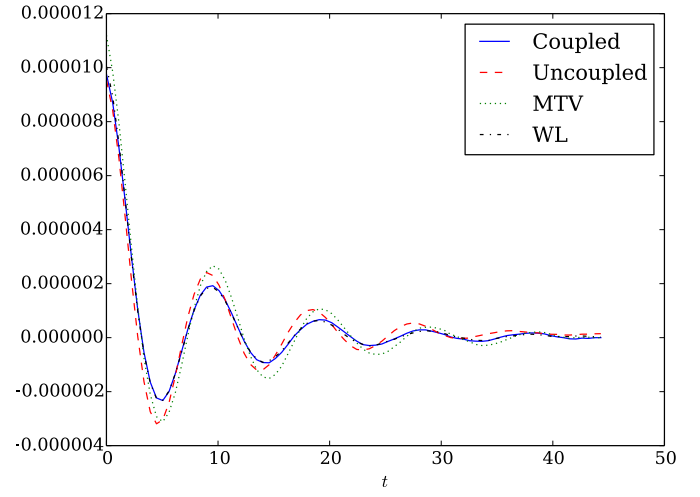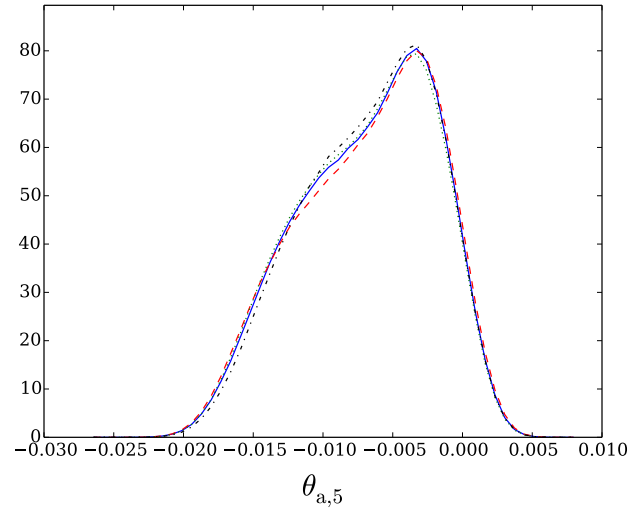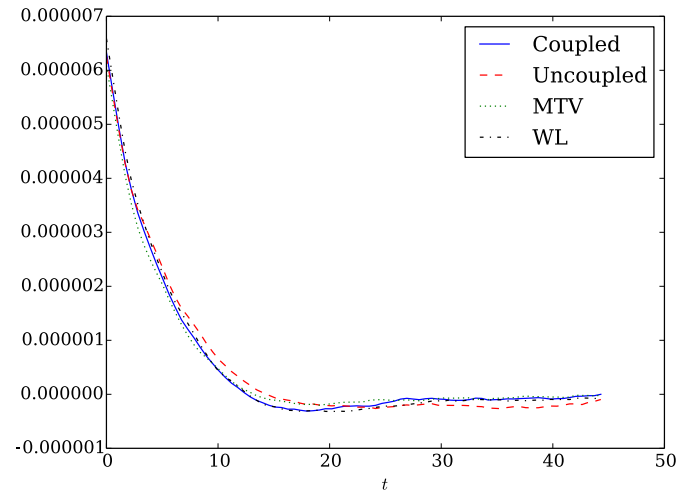

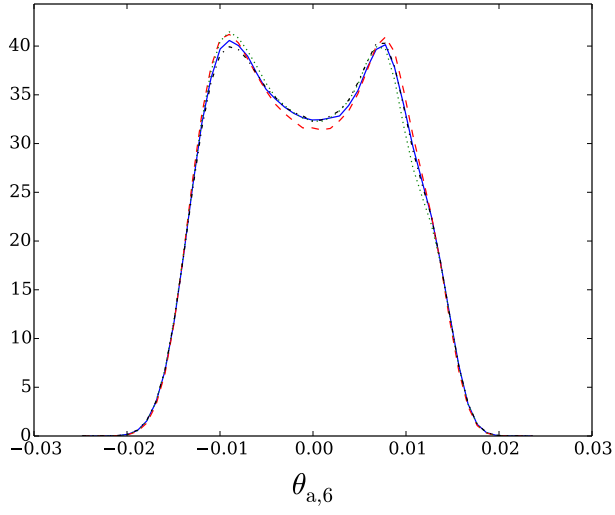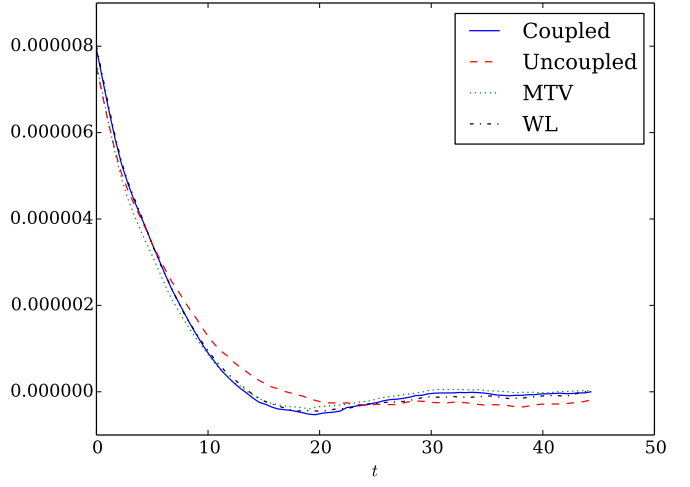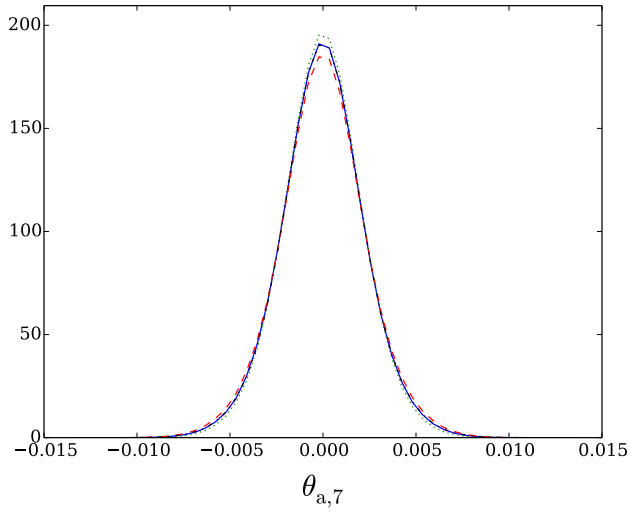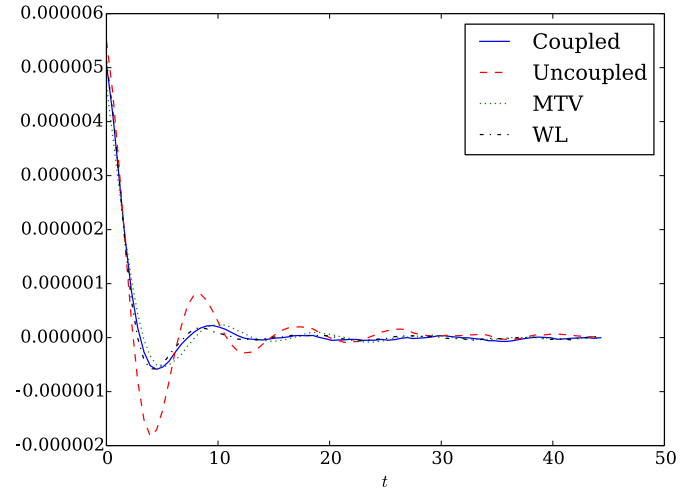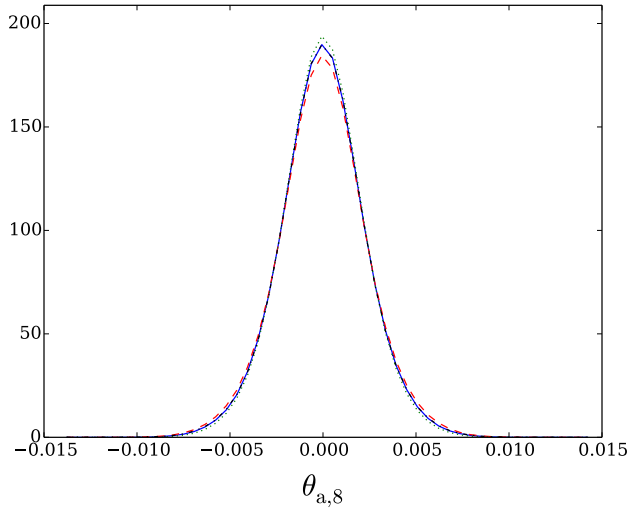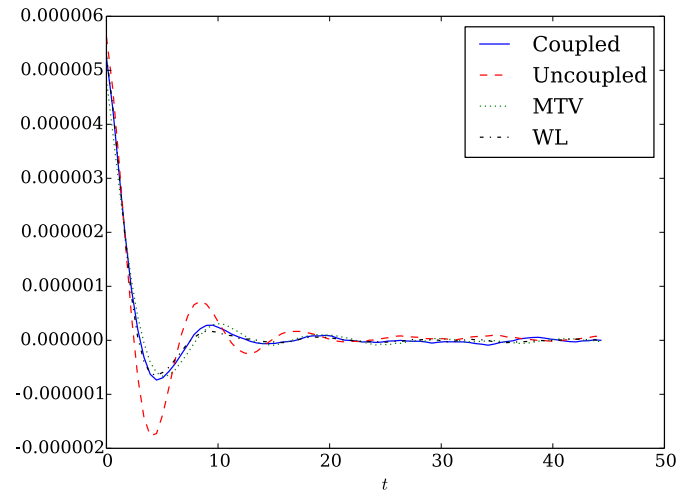

**Oceanic variables** Only the PDFs are available for these variables.

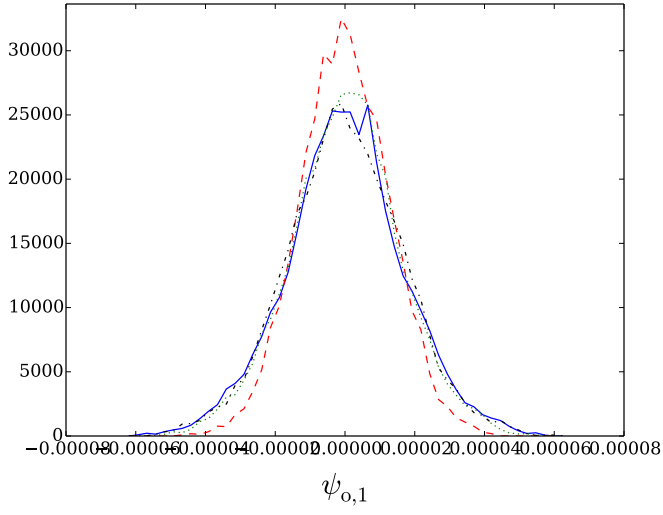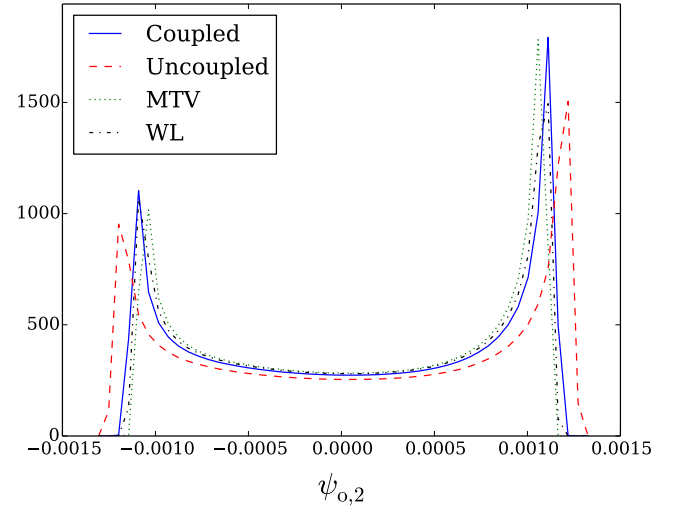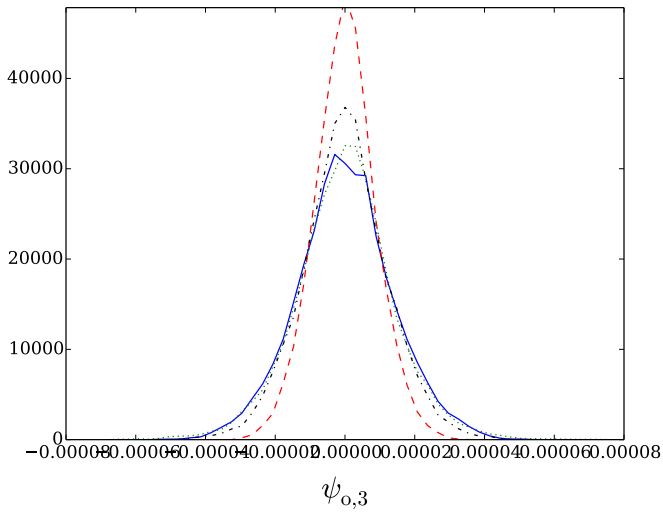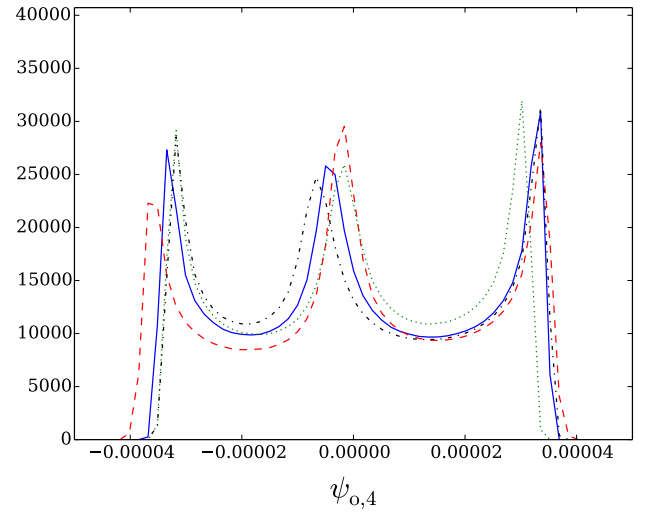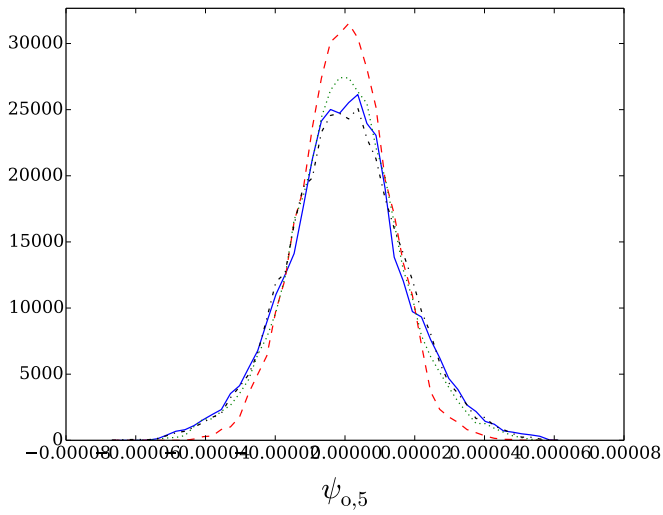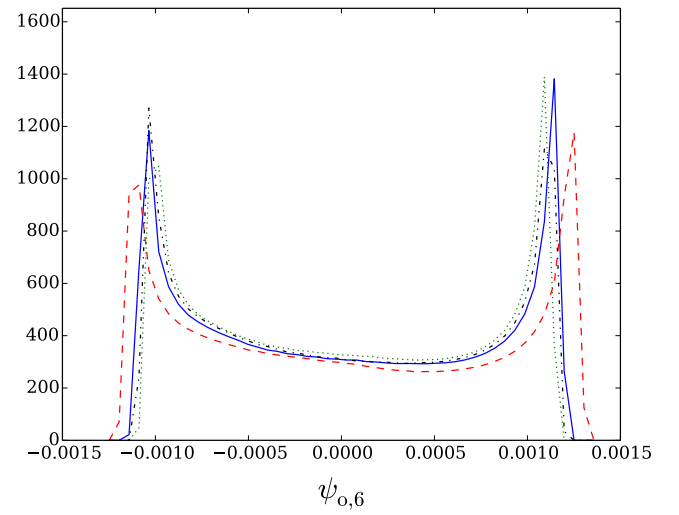

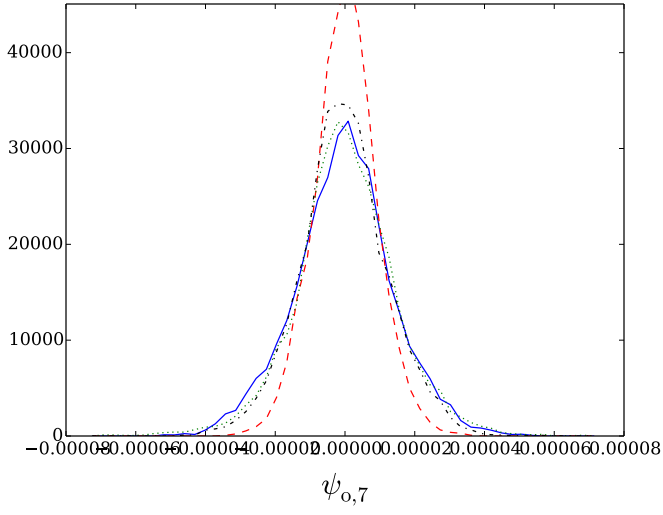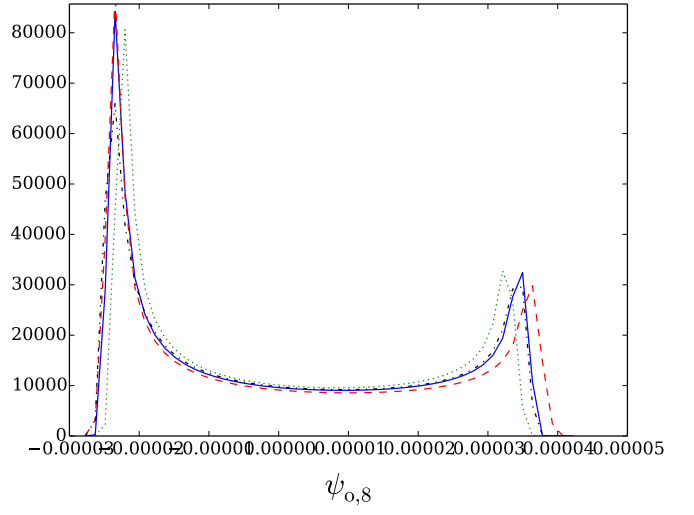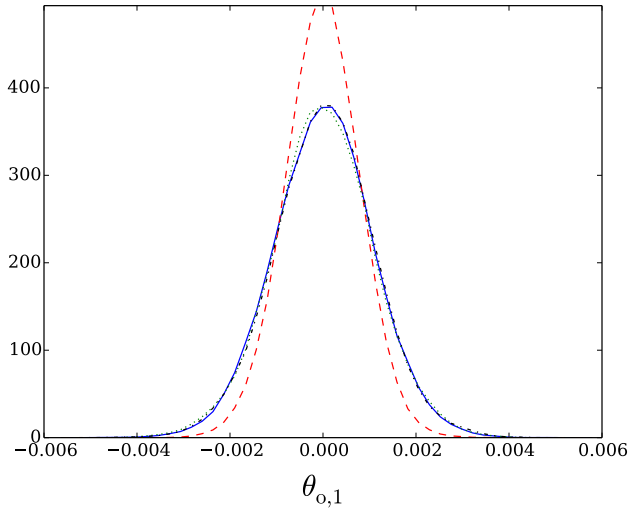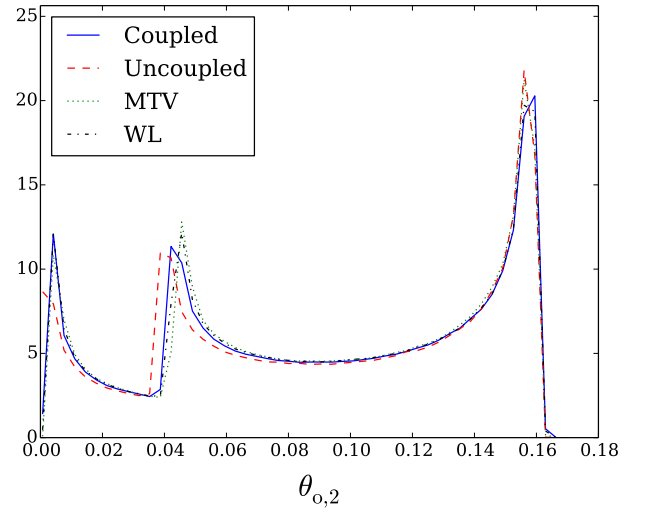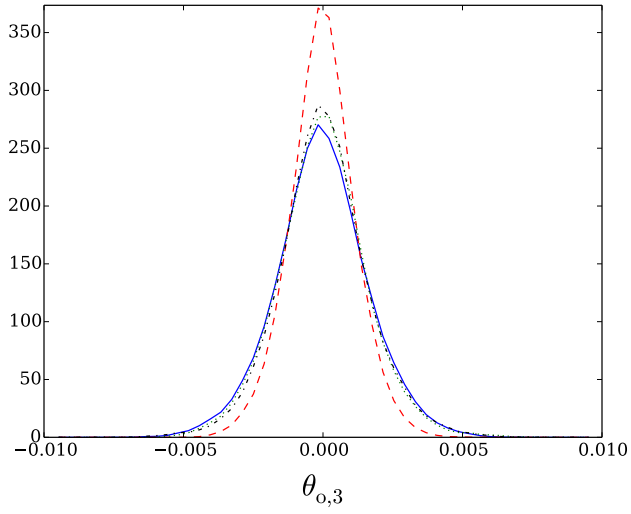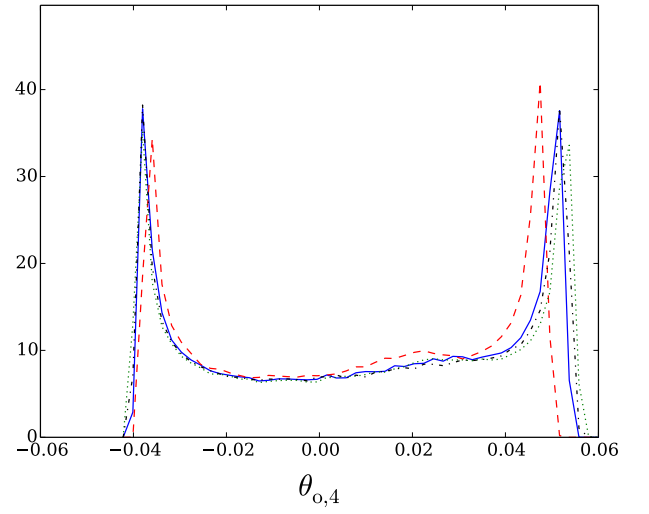

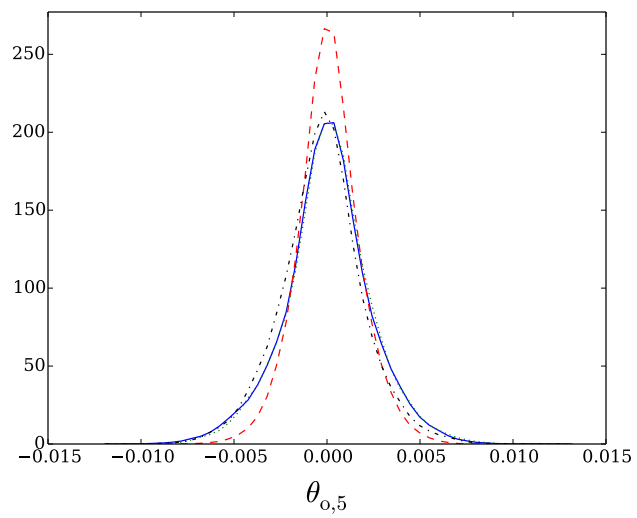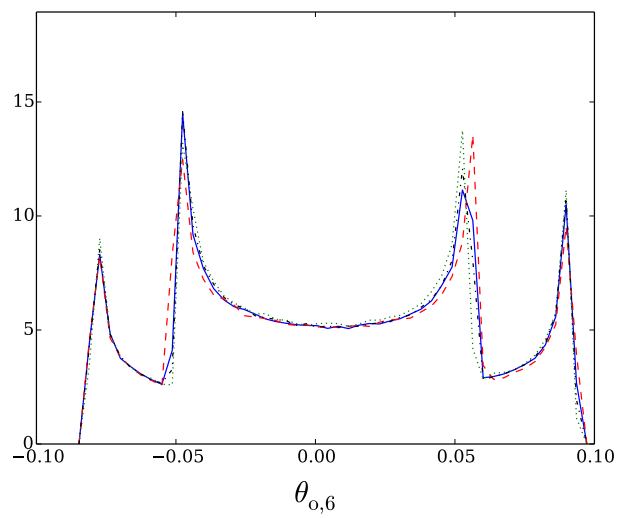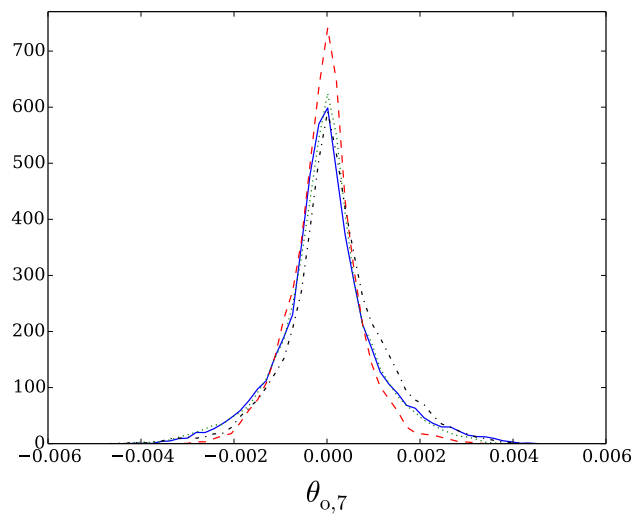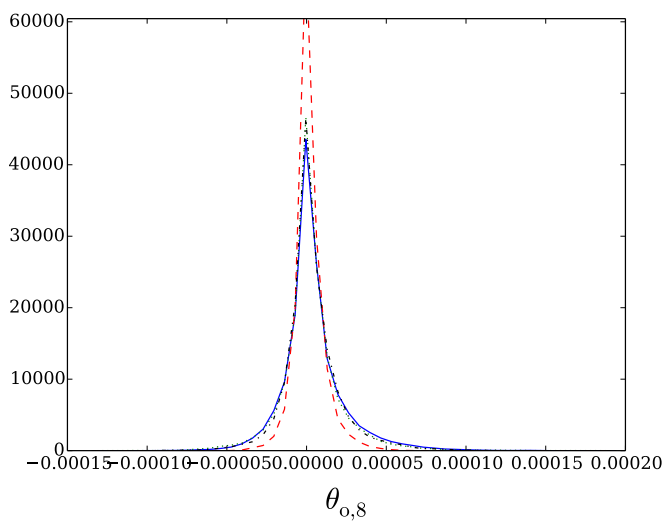

## 2.1.2 Kullback-Leibler divergences

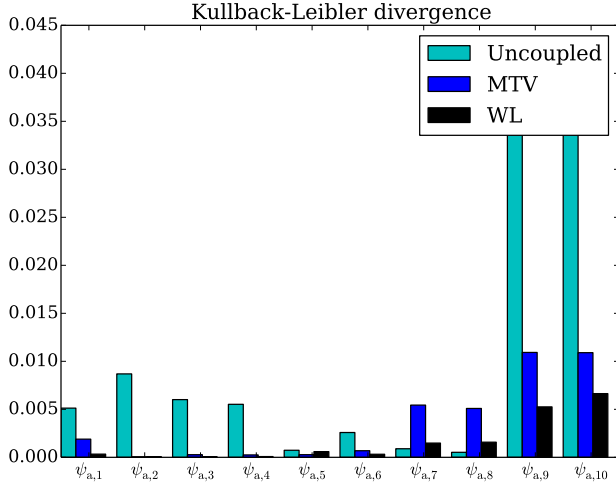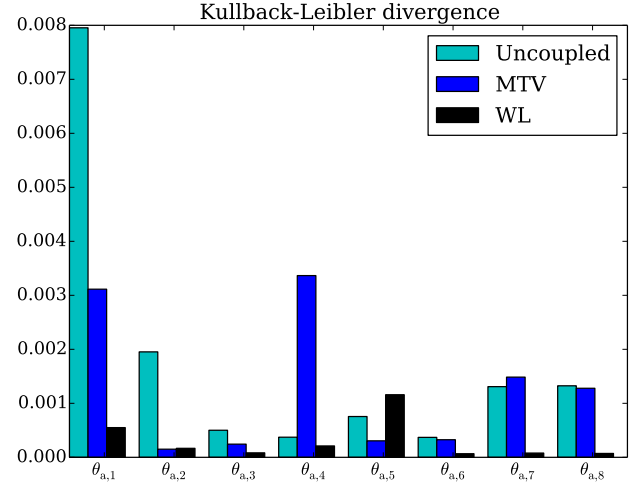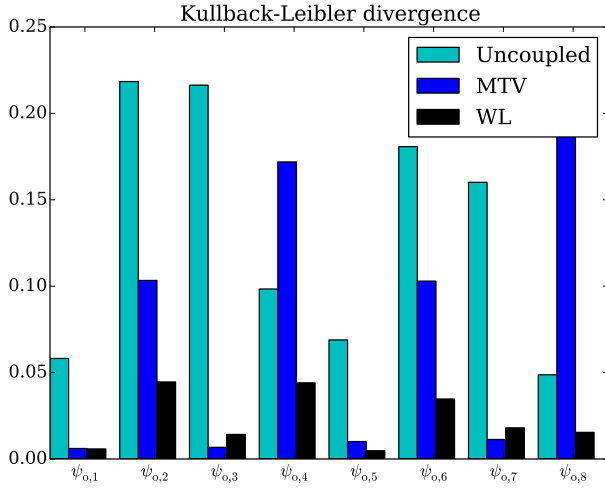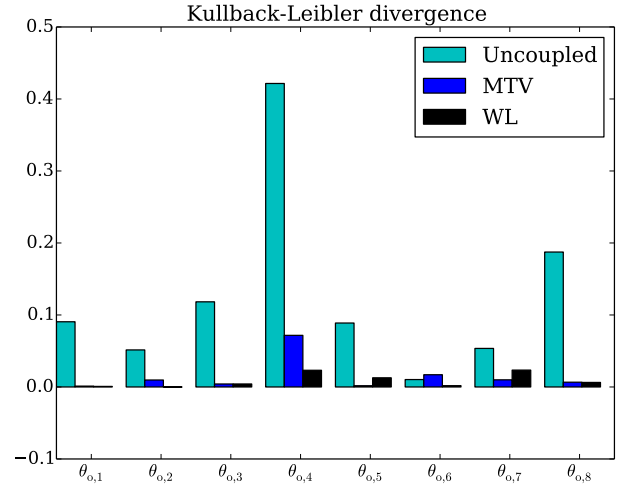

## 2.2 DDV2016 parameter set

### 2.2.1 PDFs and autocorrelation functions of the resolved variables

Atmospheric variables of the model.

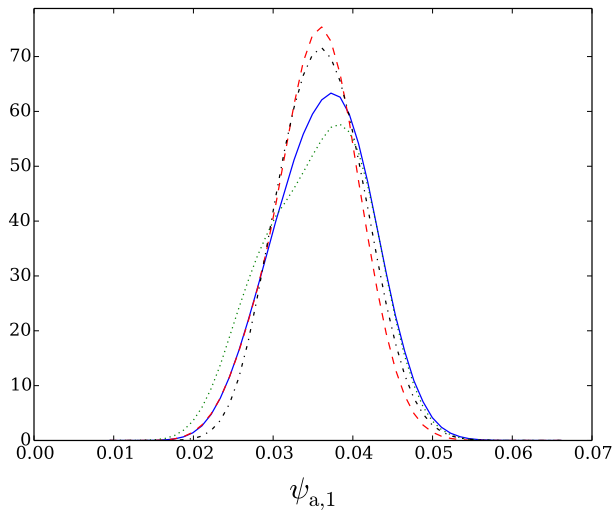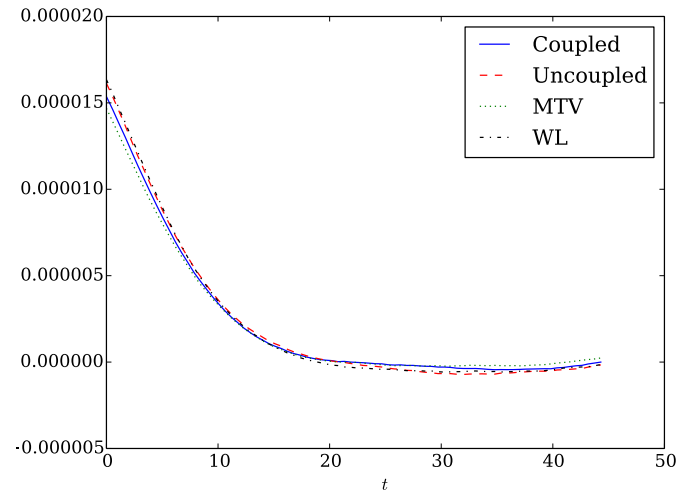

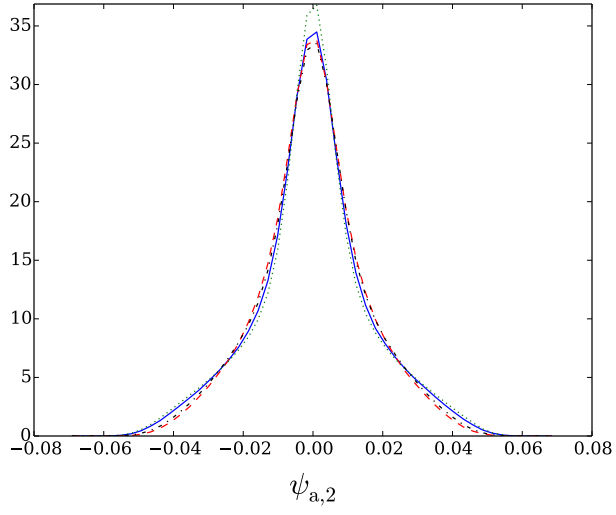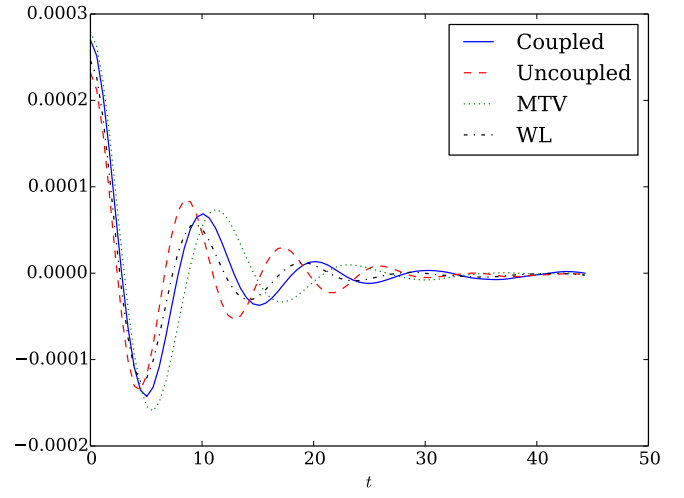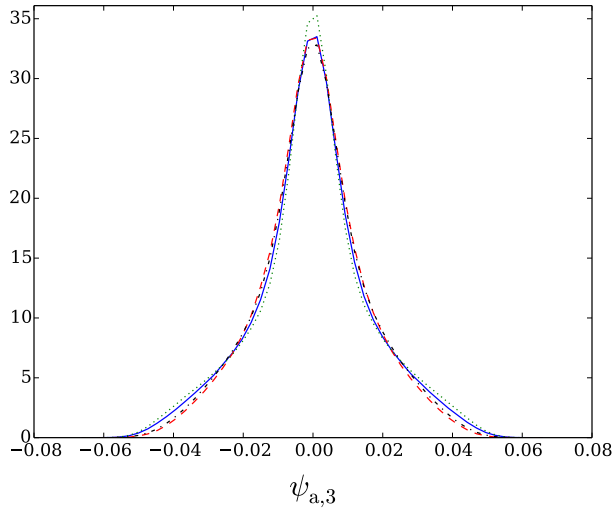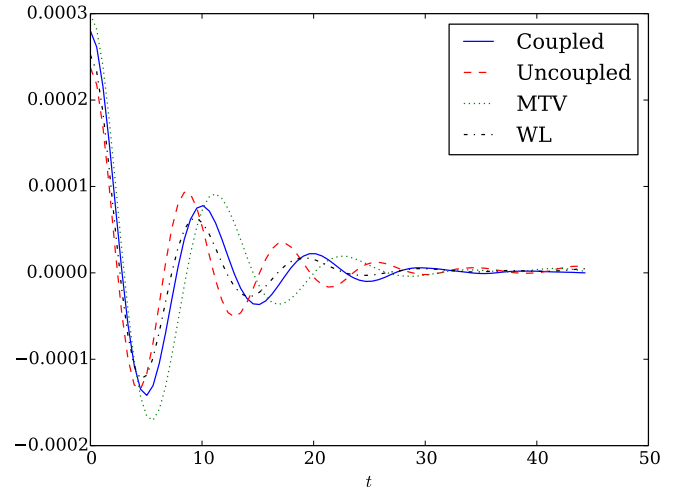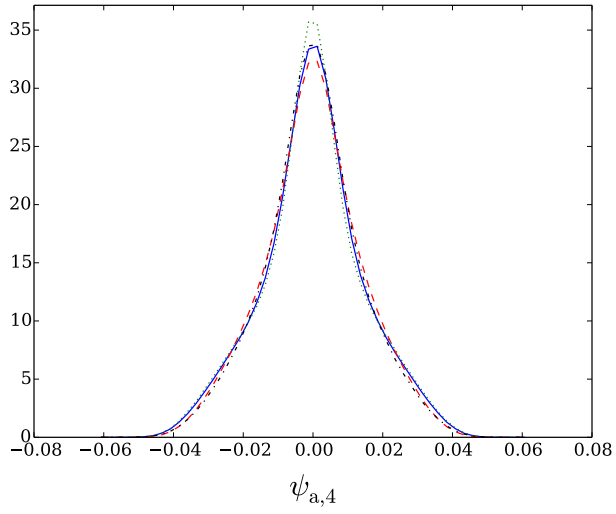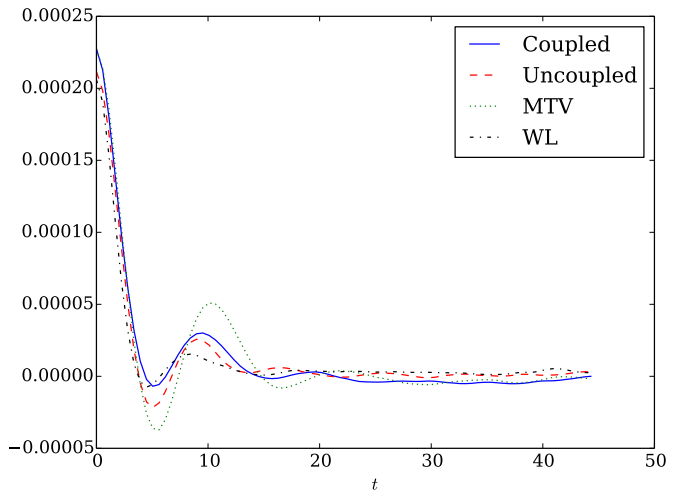

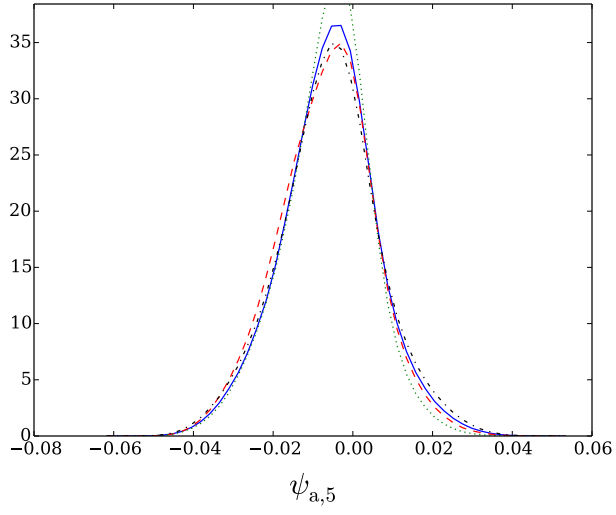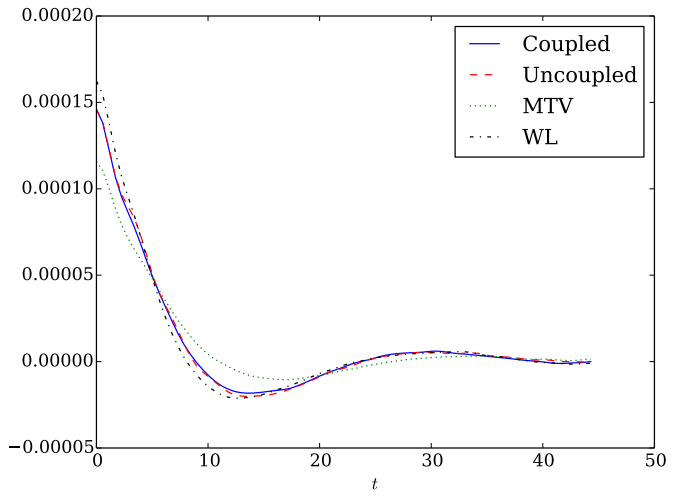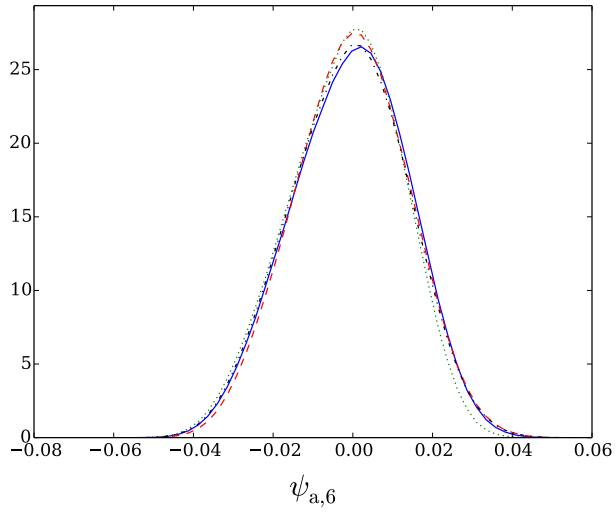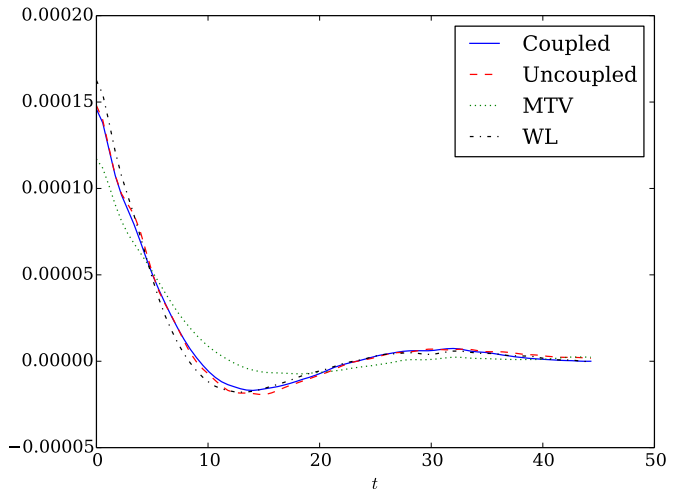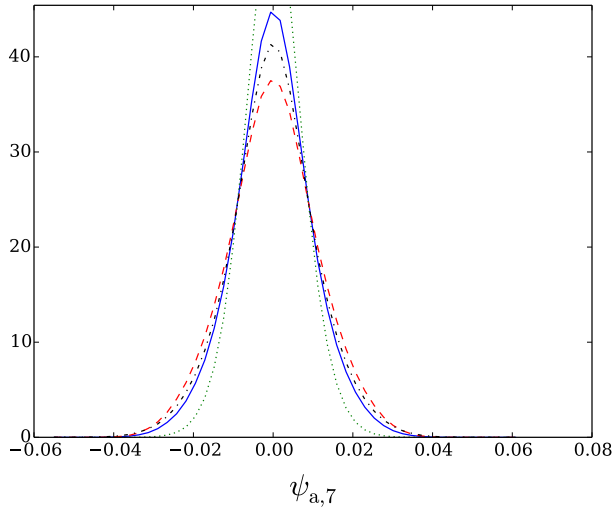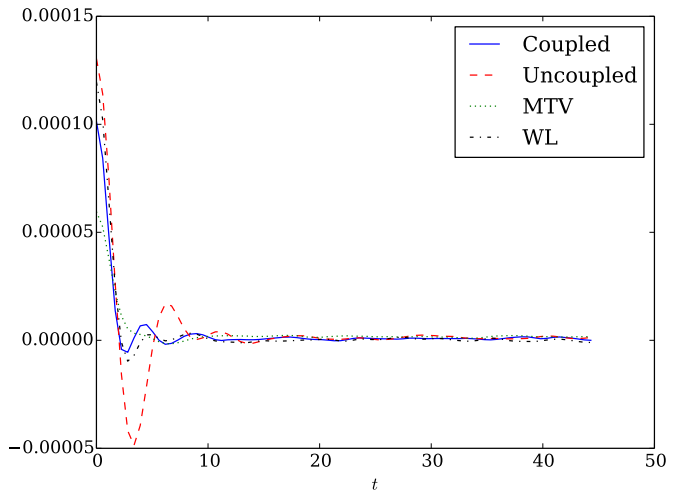

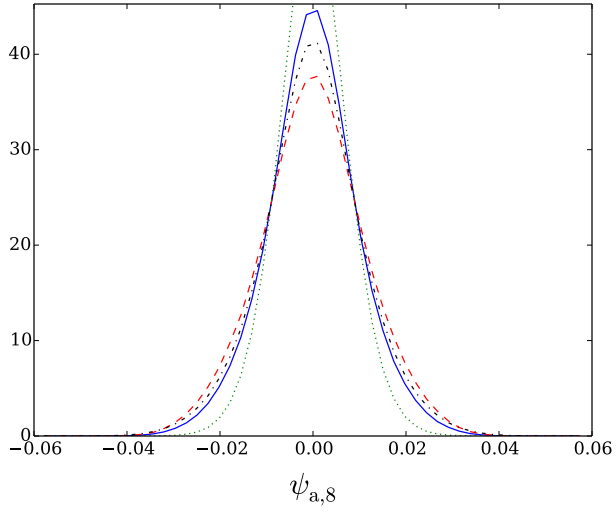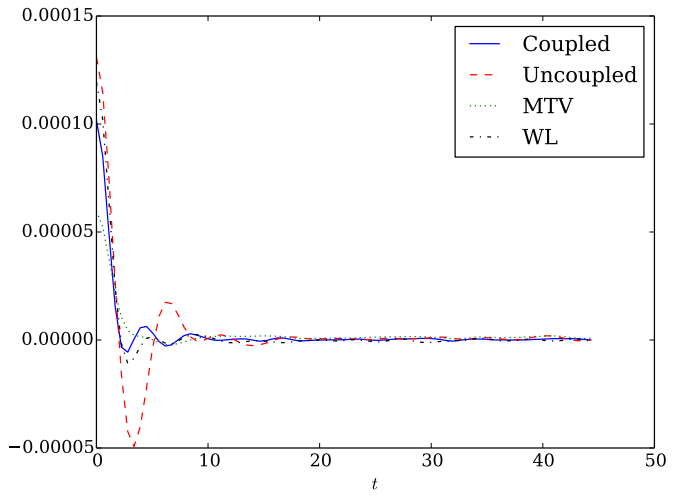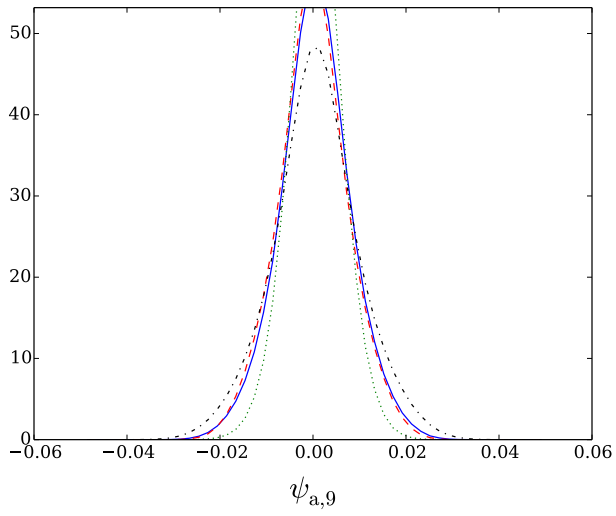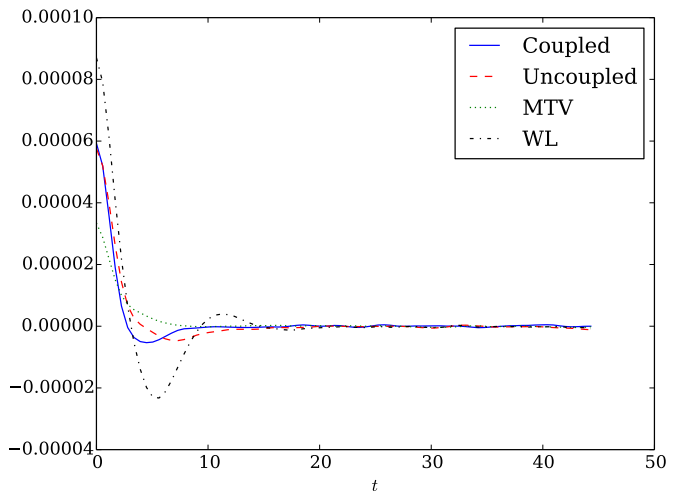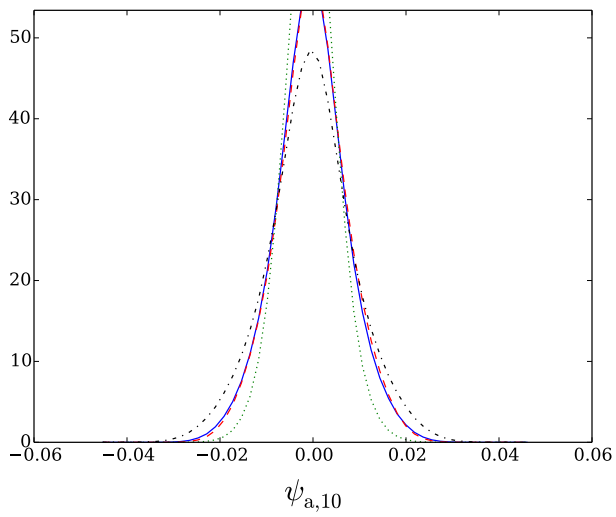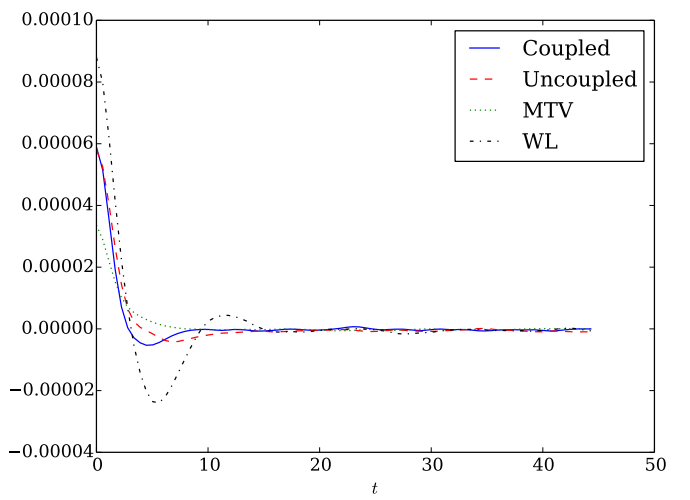

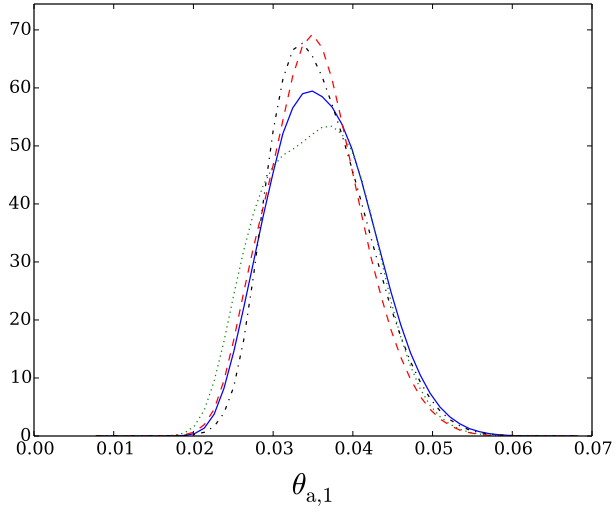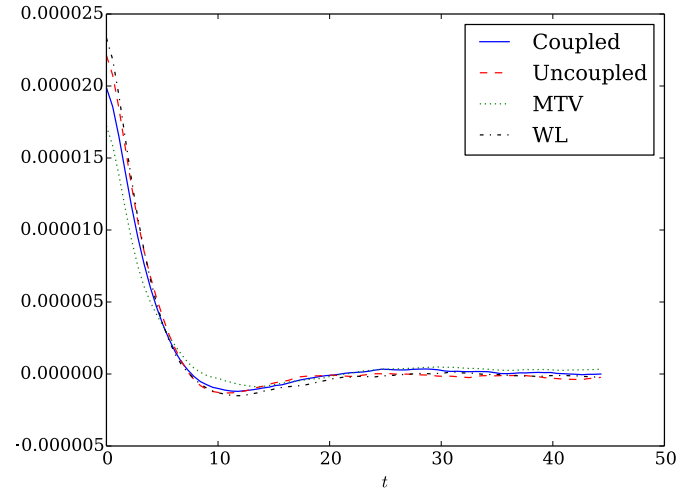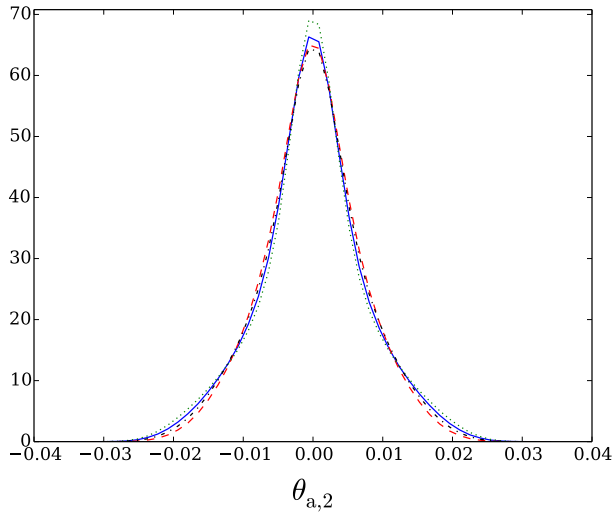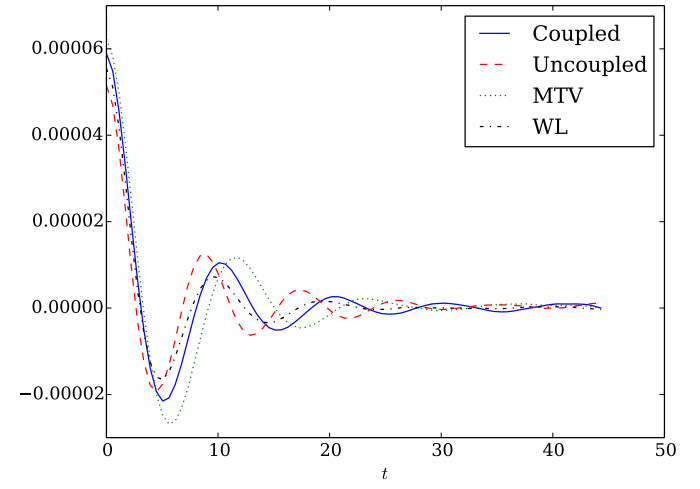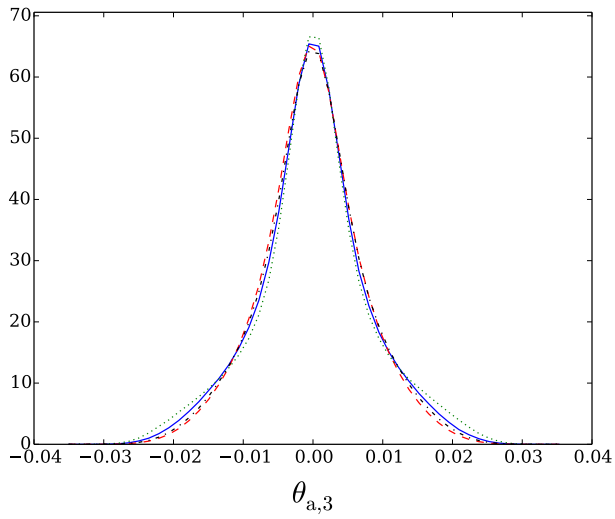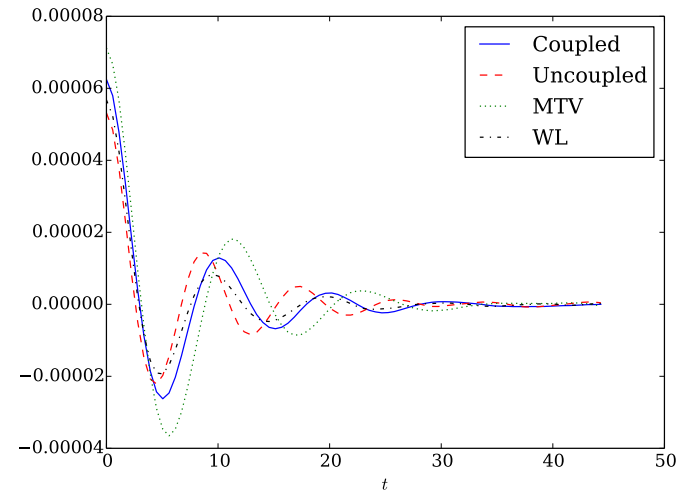

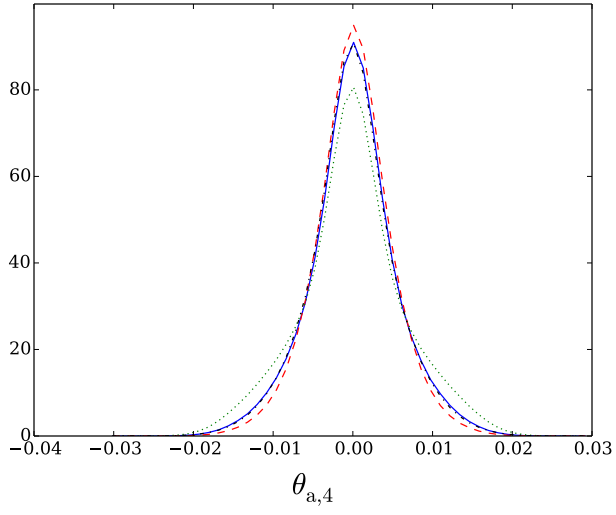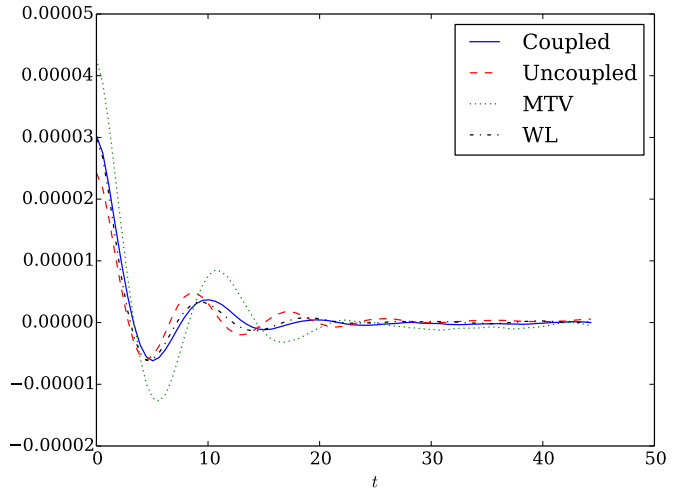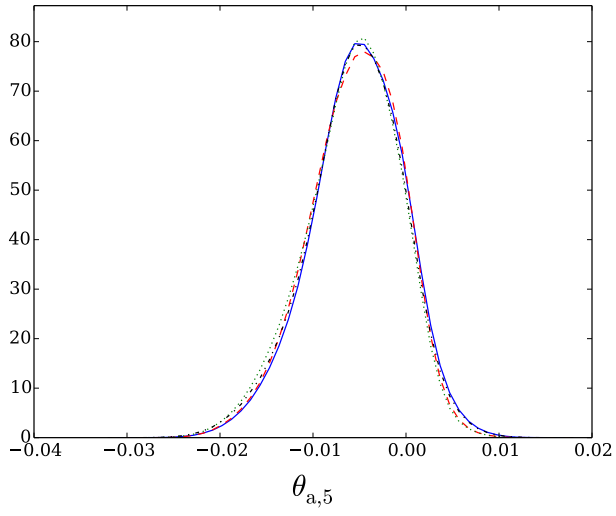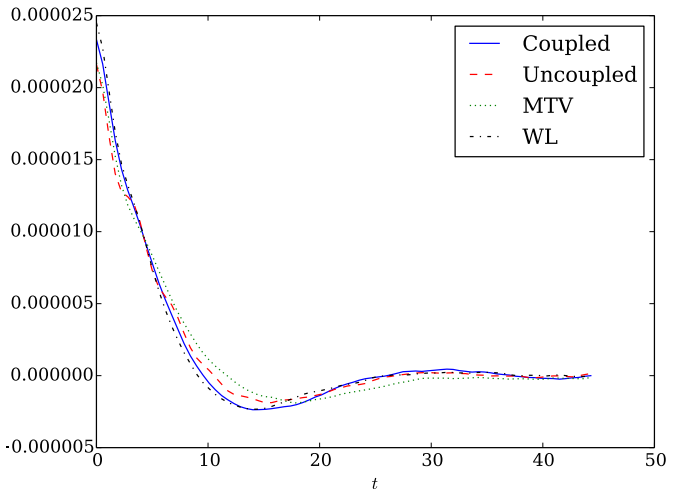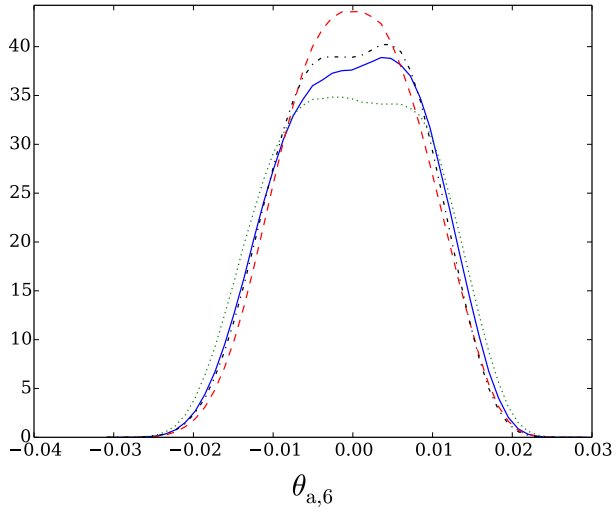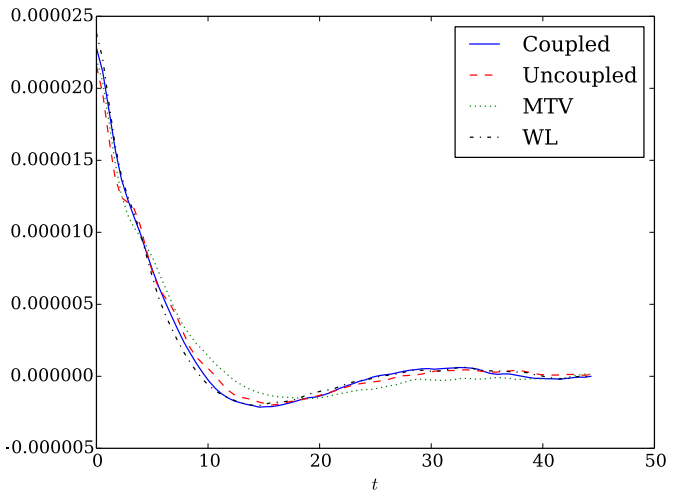

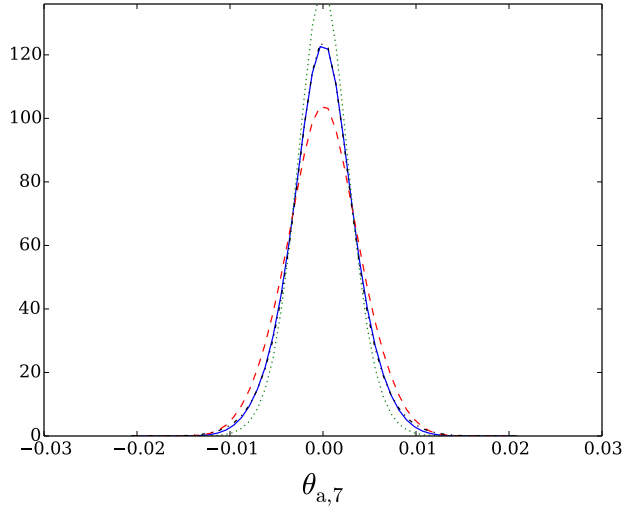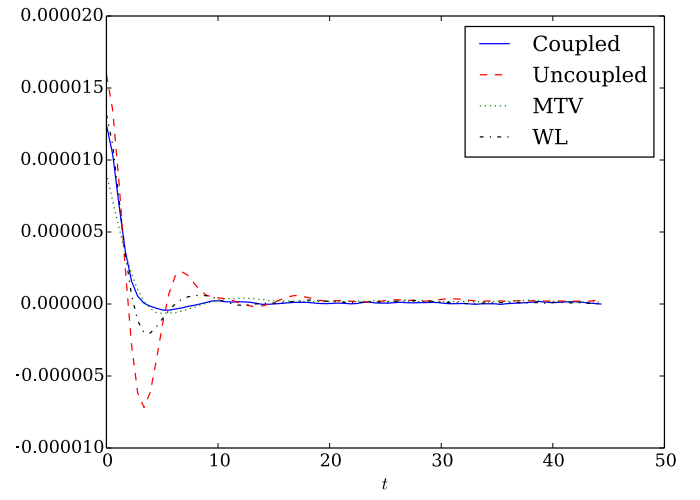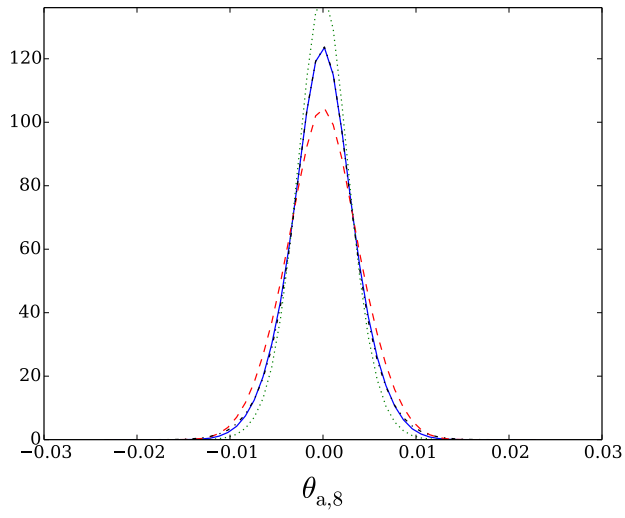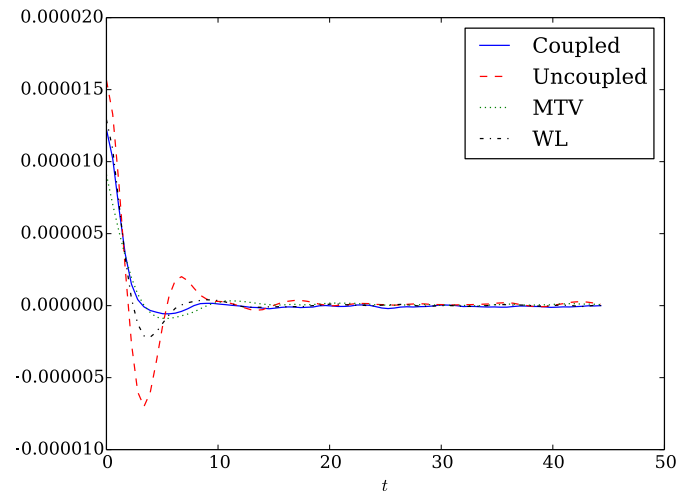

**Oceanic variables** Only the PDFs are available for these variables.

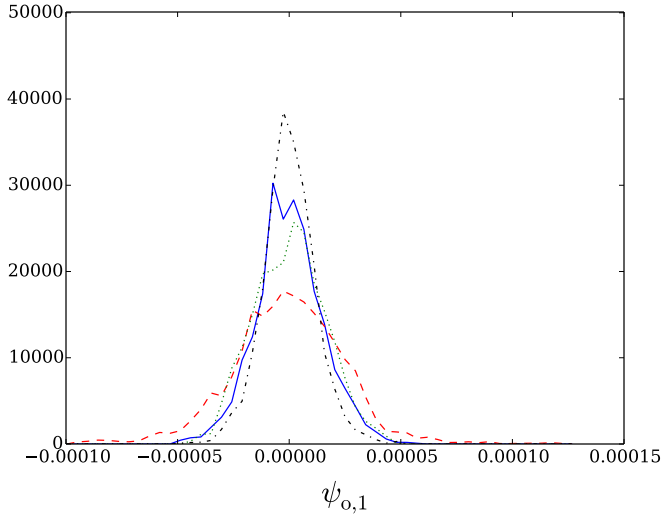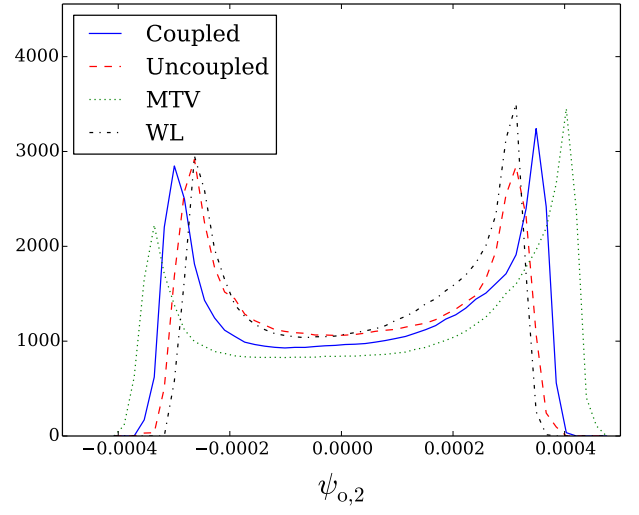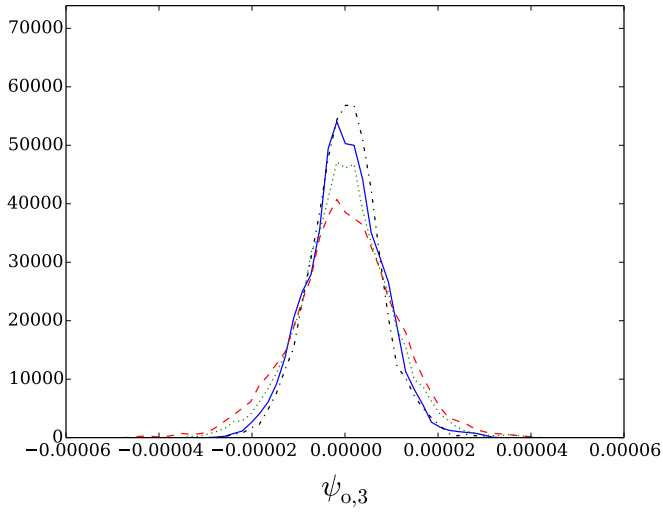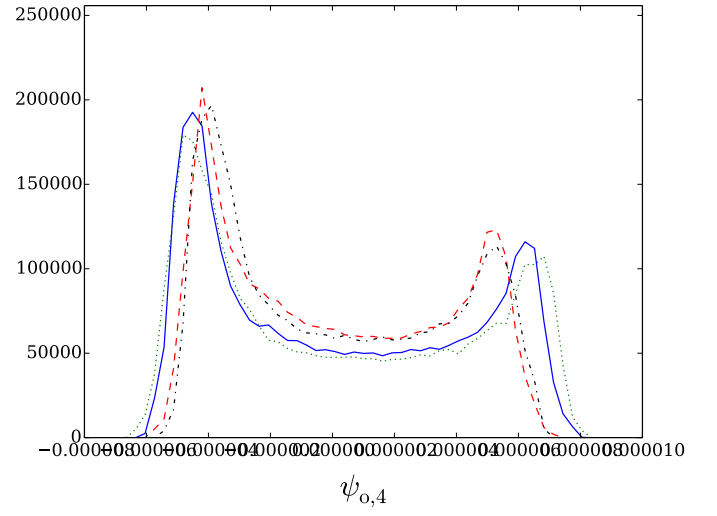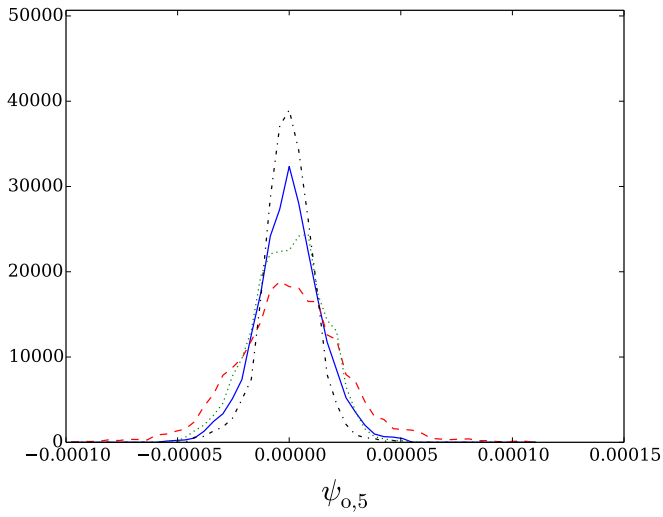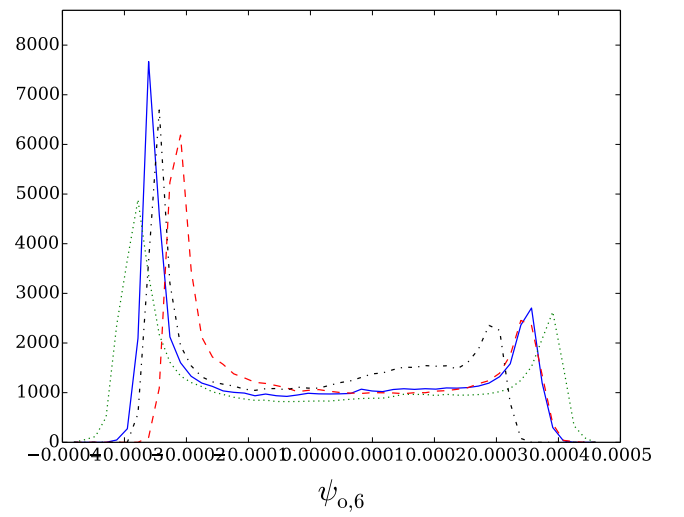

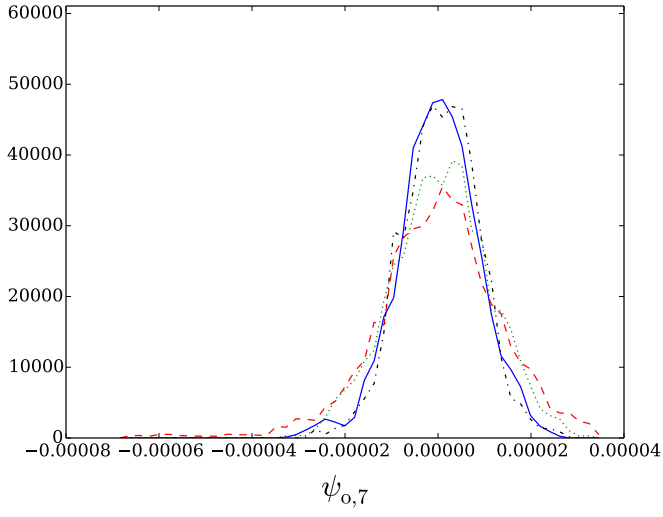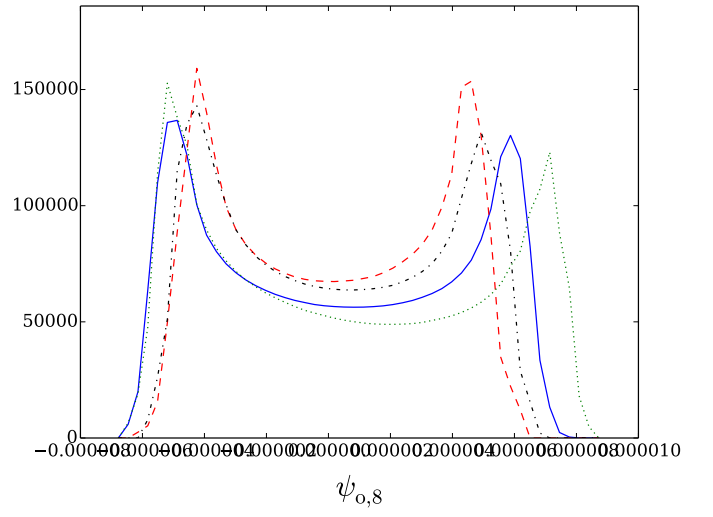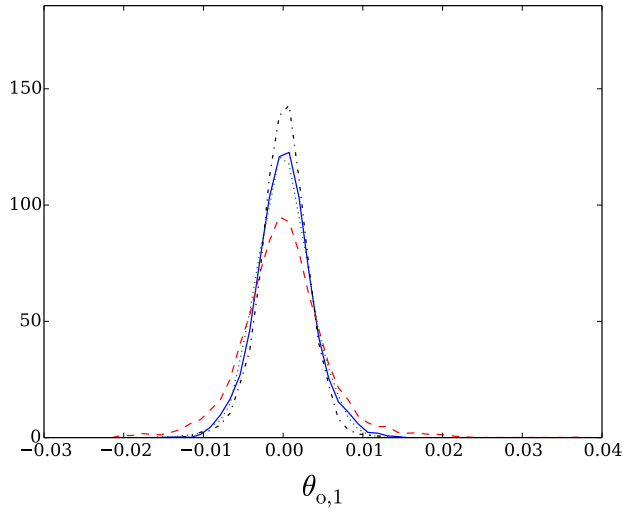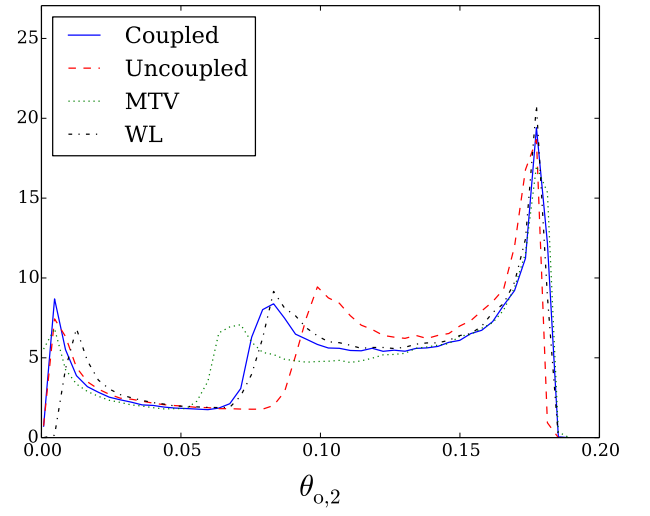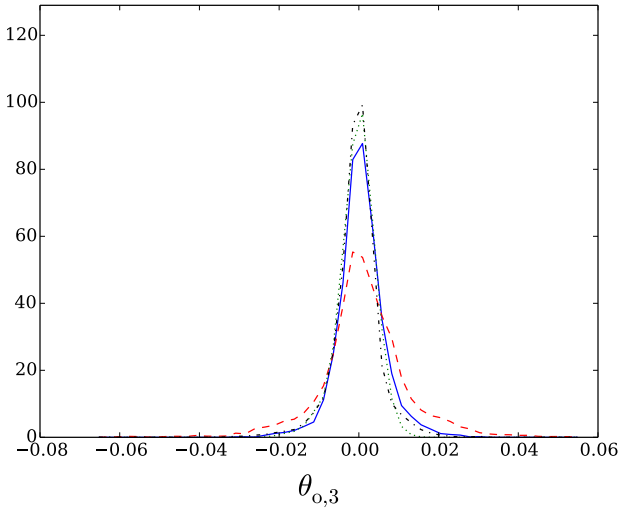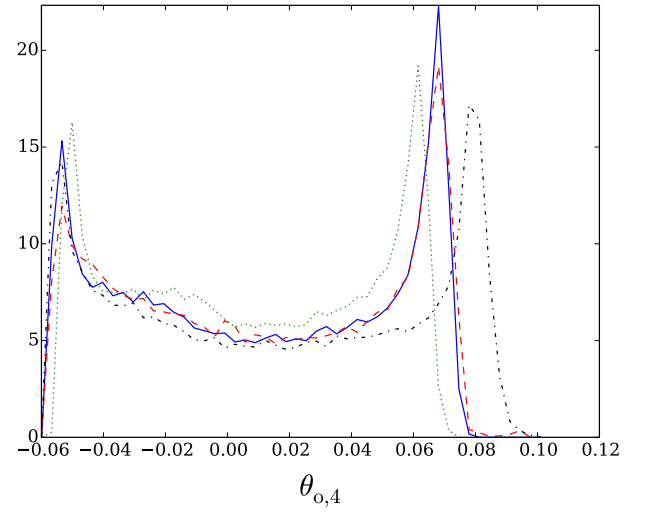

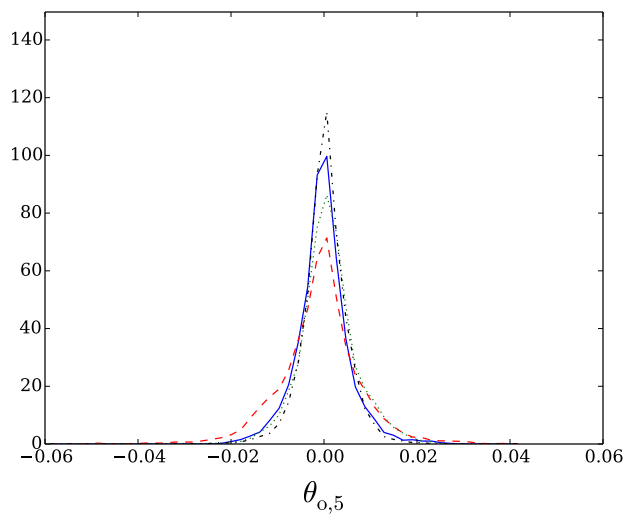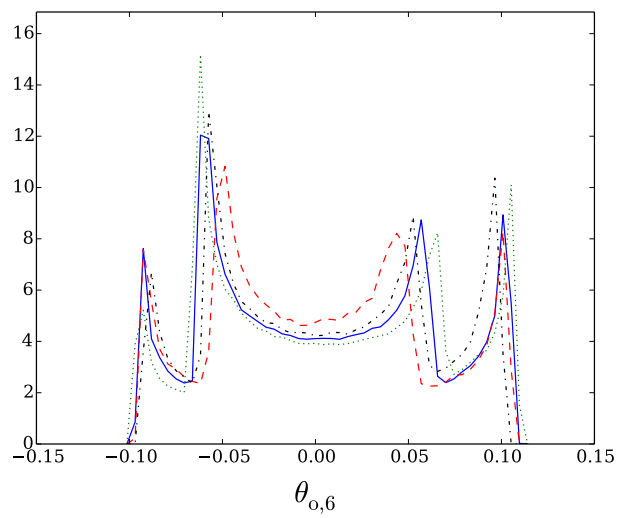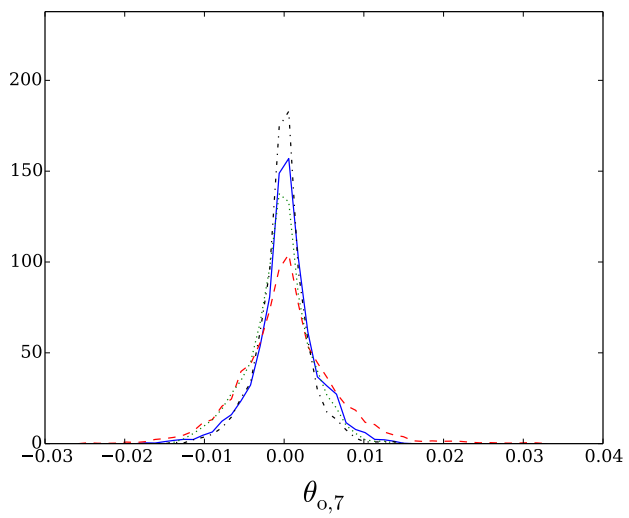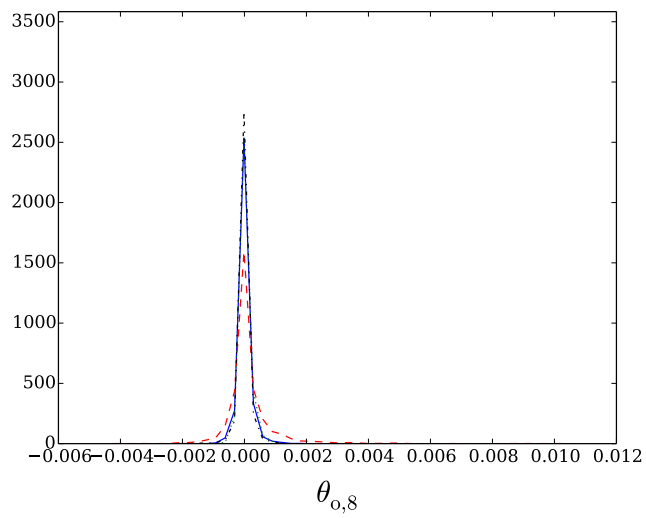

## 2.2.2 Kullback-Leibler divergences

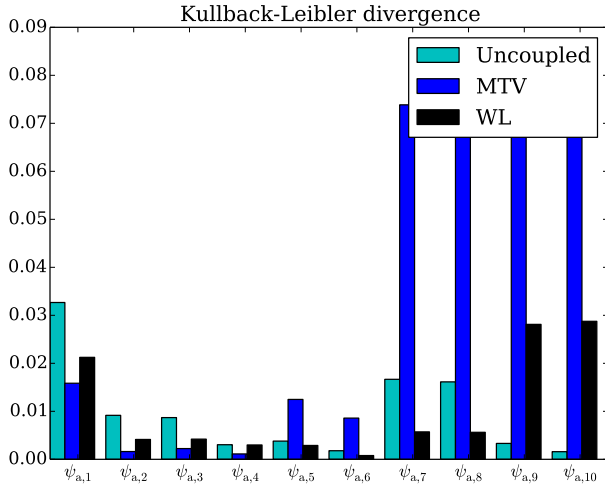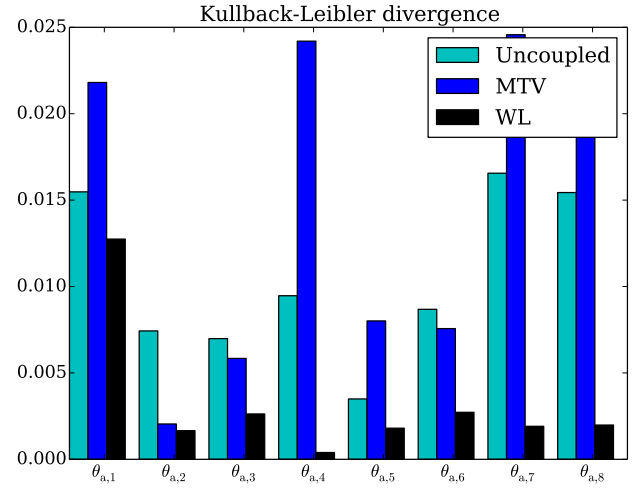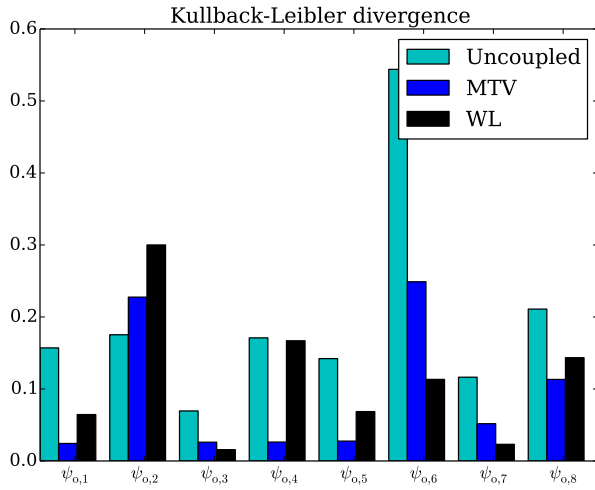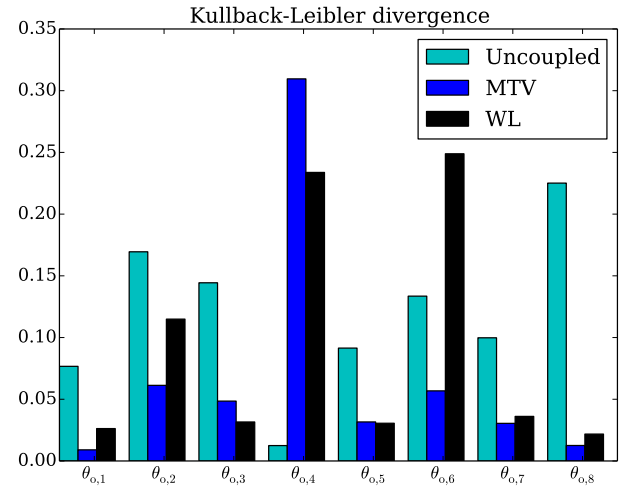

## 2.3 noLFV parameter set

### 2.3.1 PDFs and autocorrelation functions of the resolved variables

Atmospheric variables of the model.

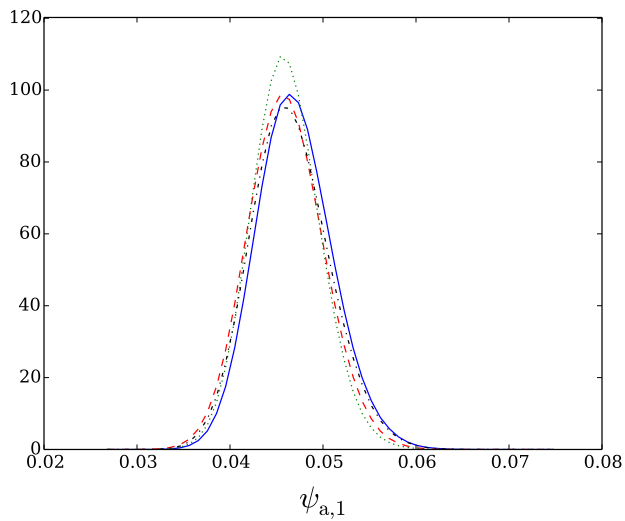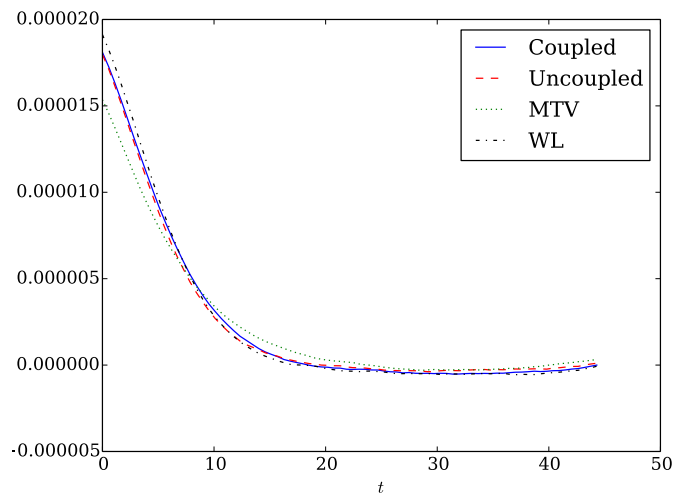

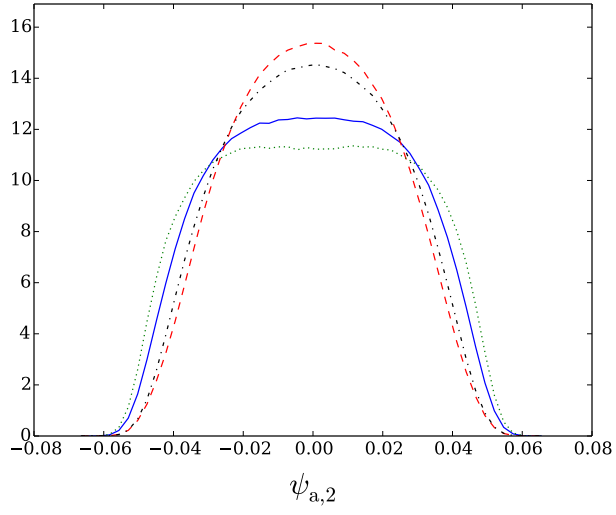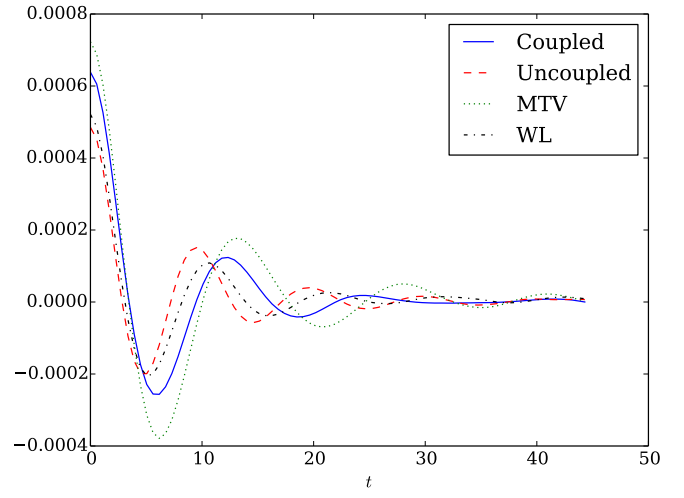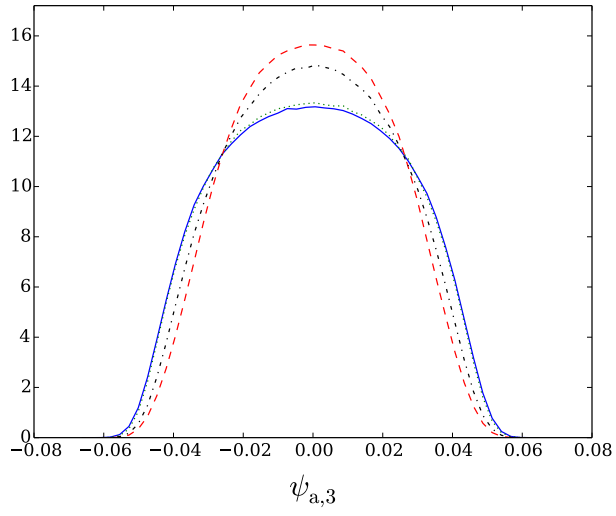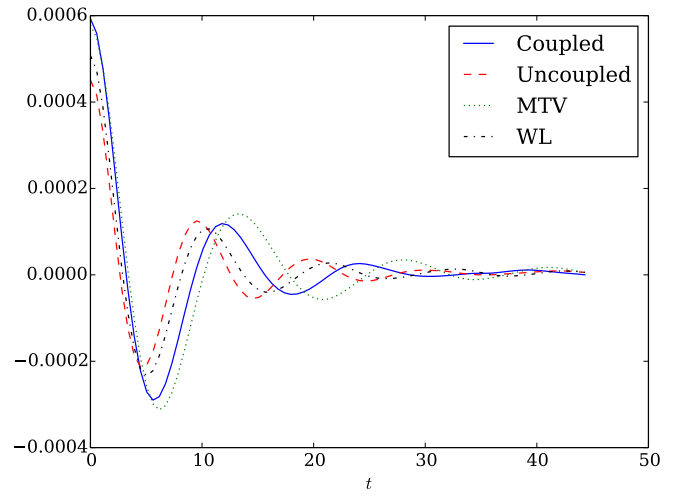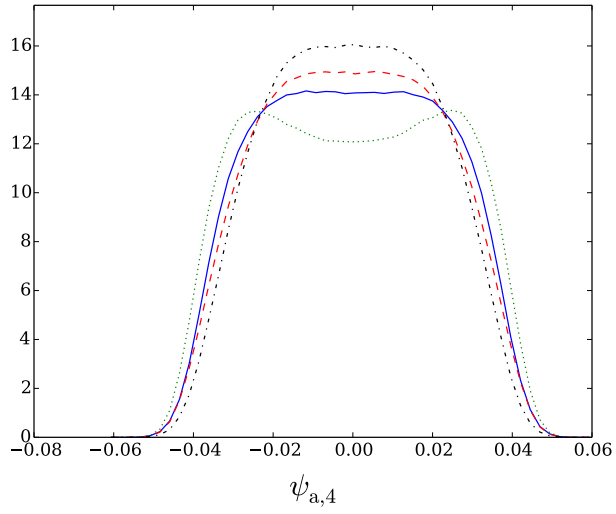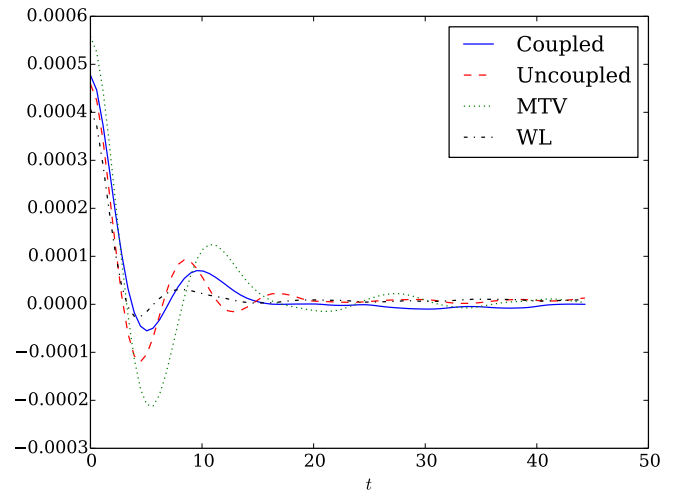

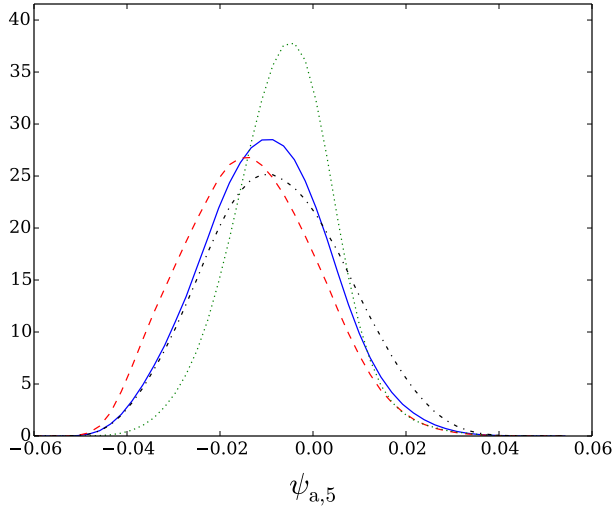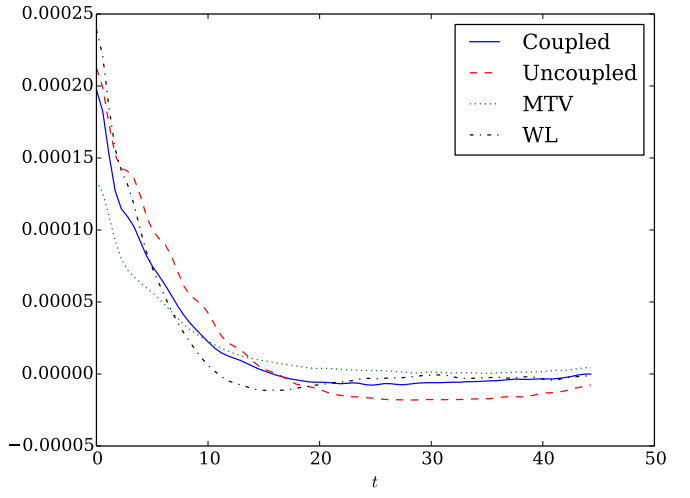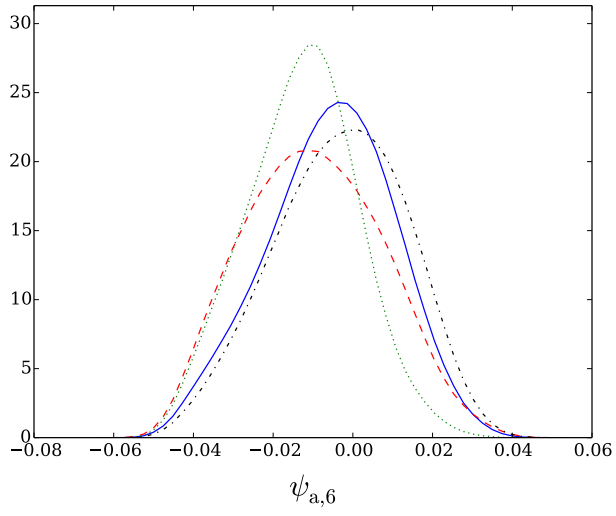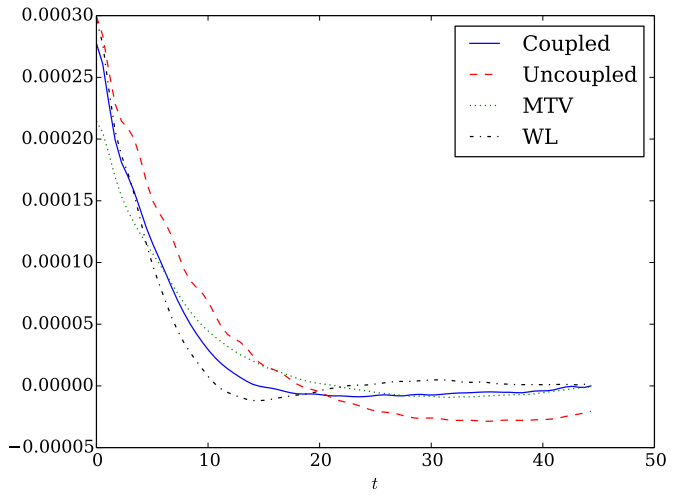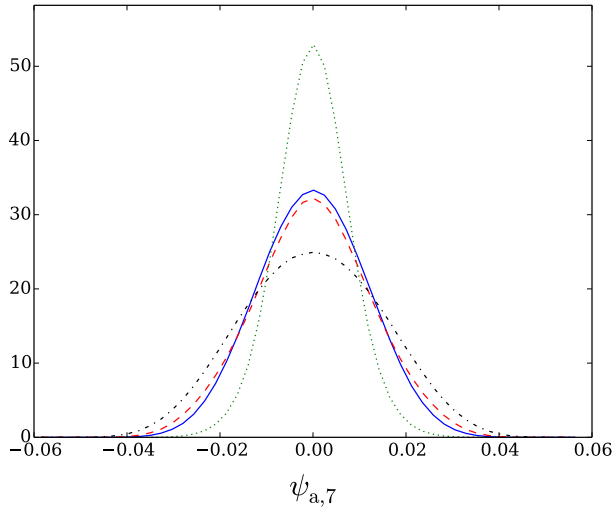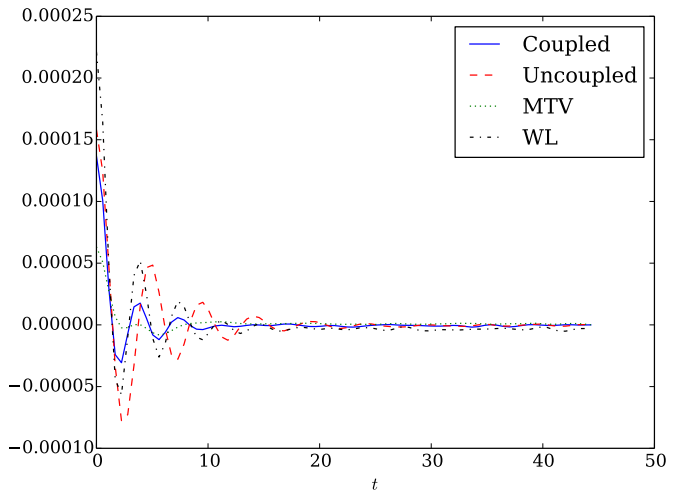

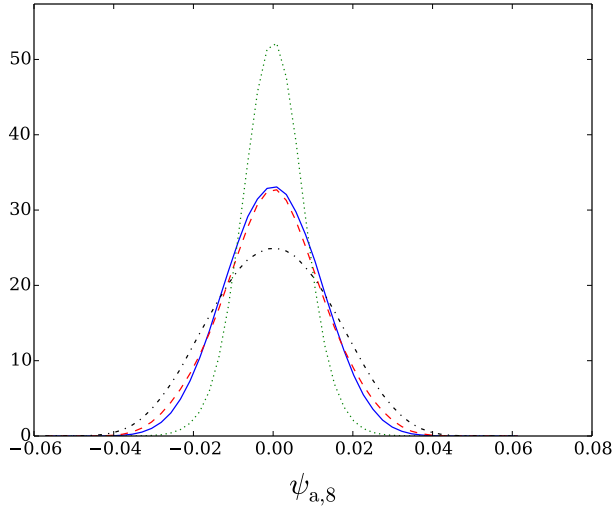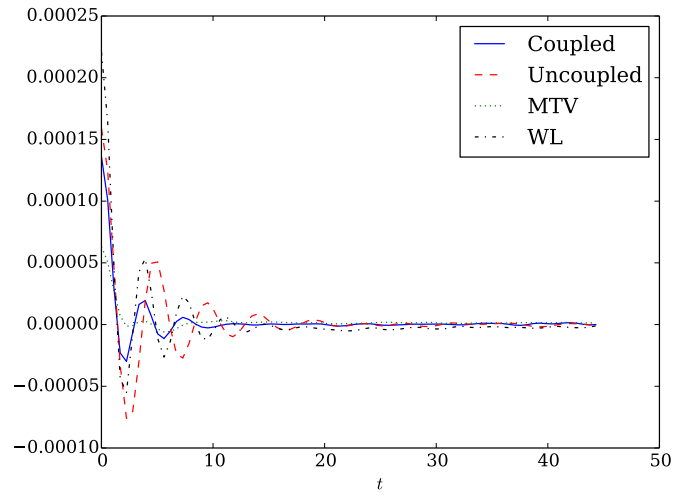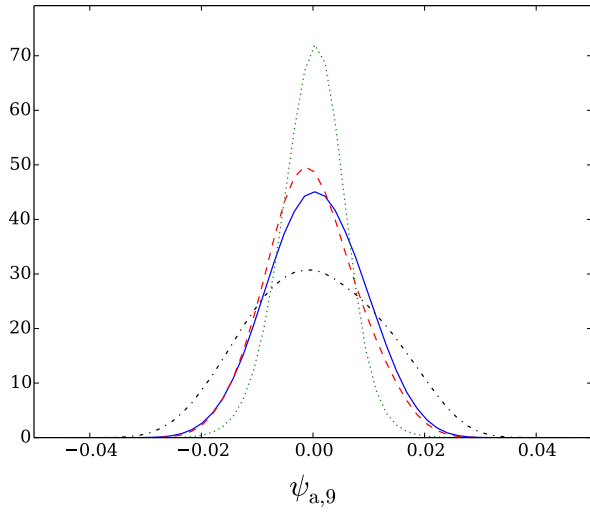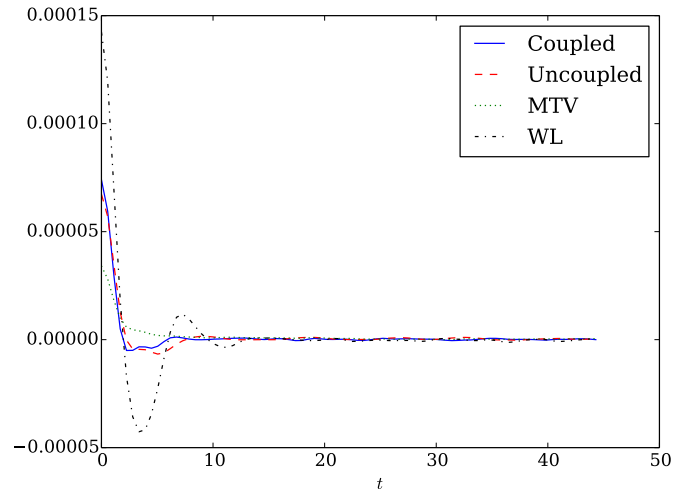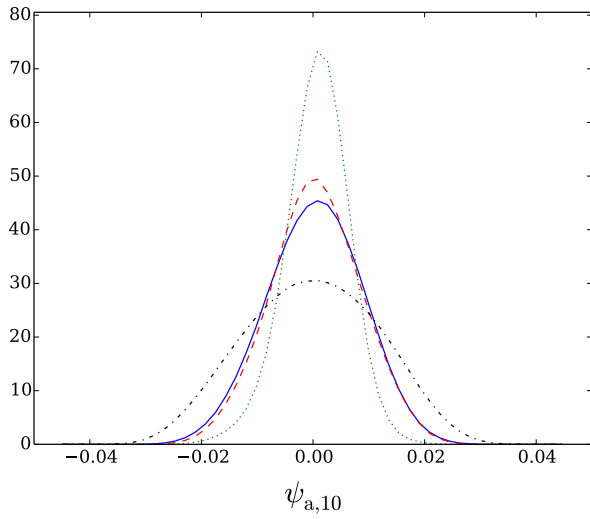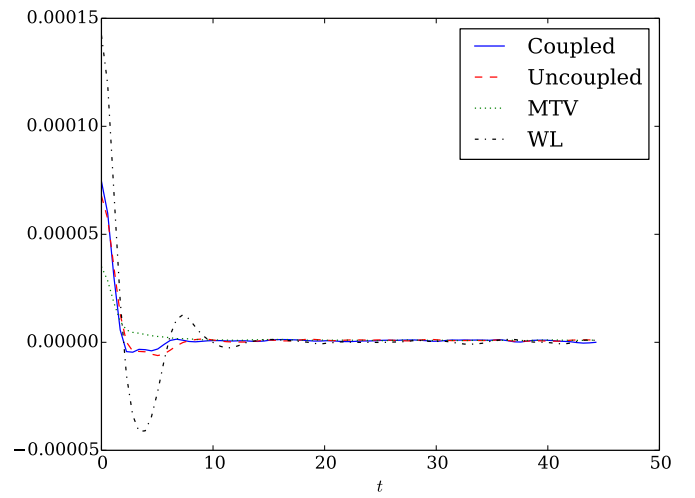

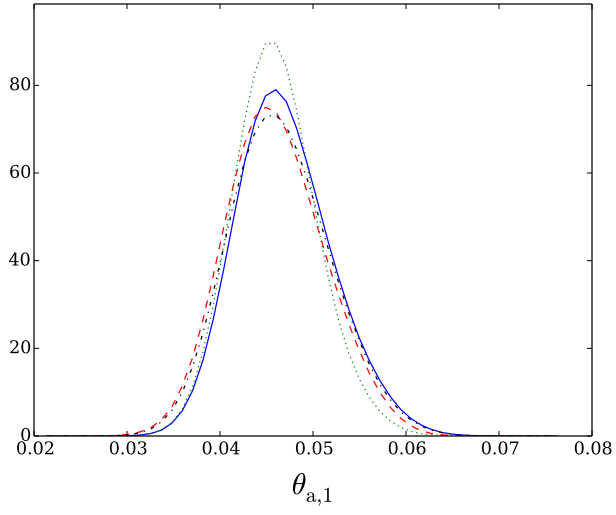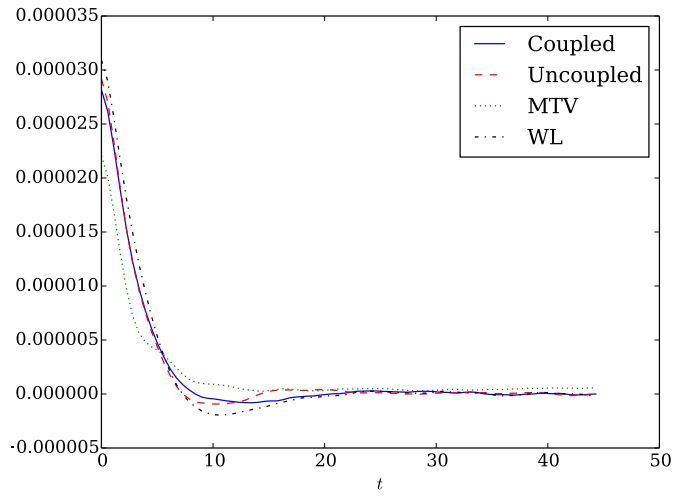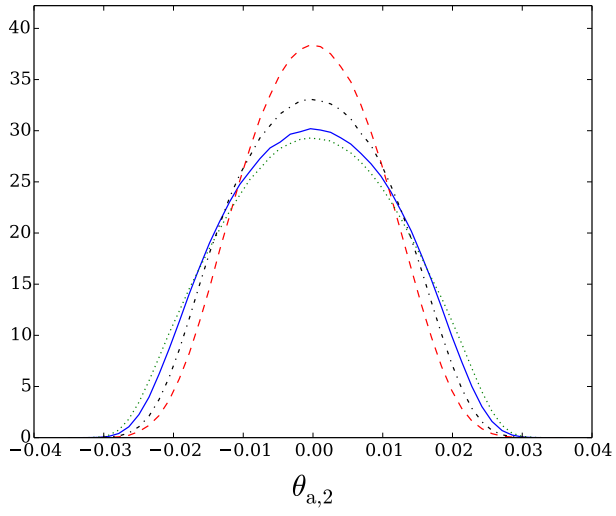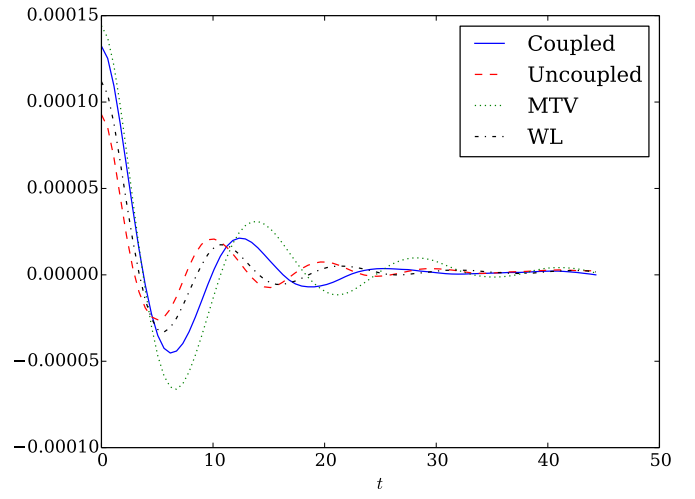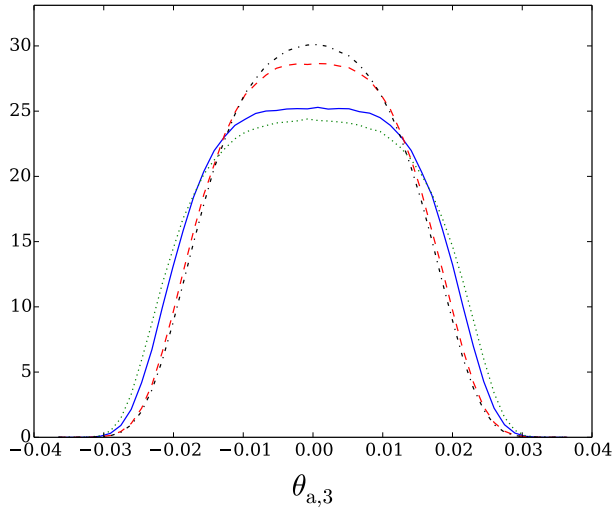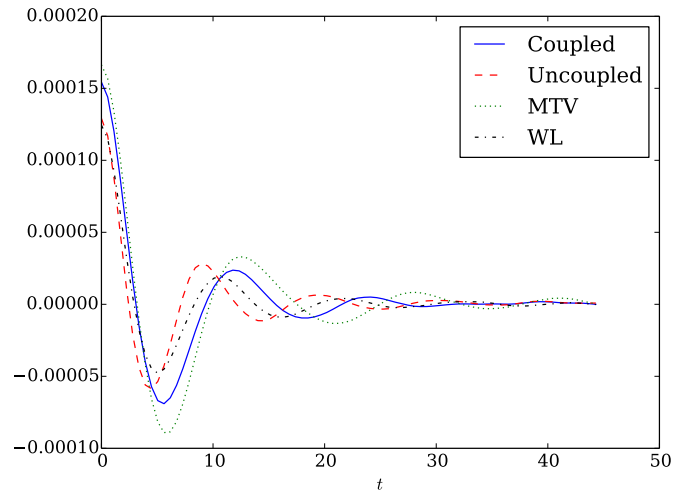

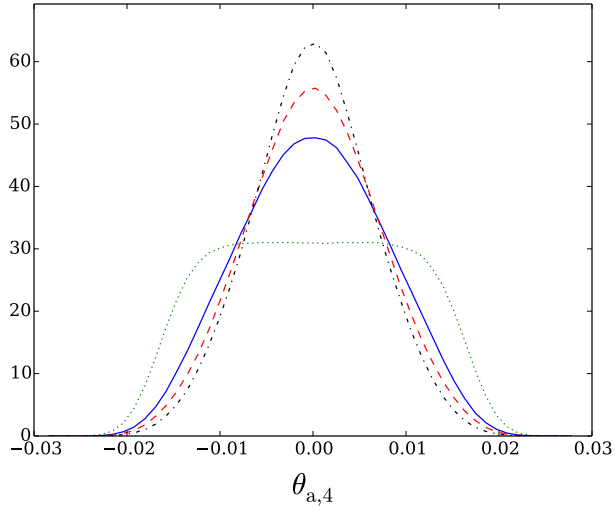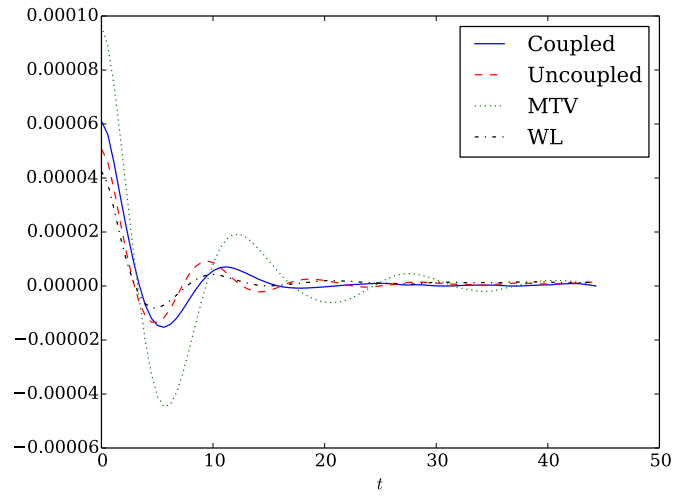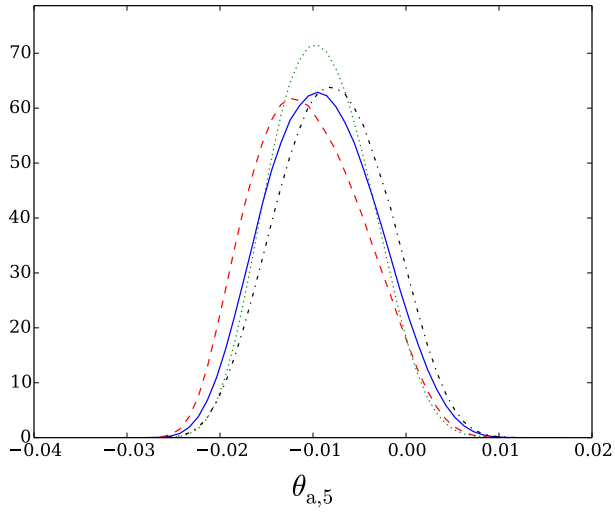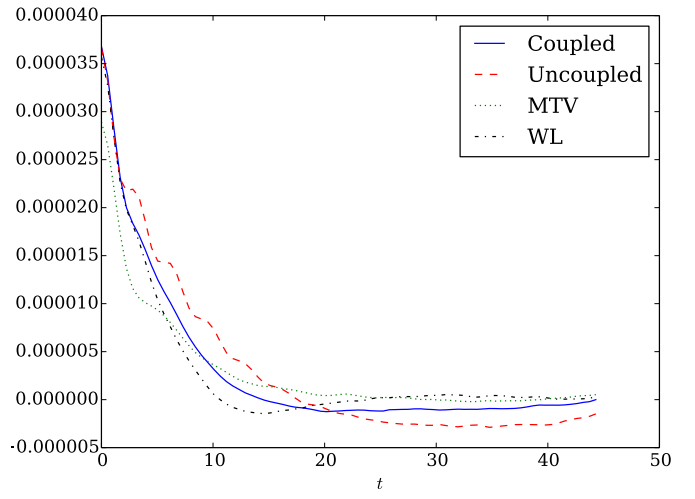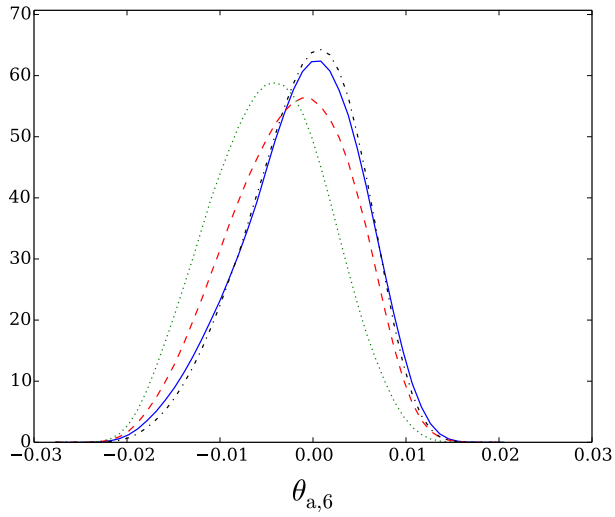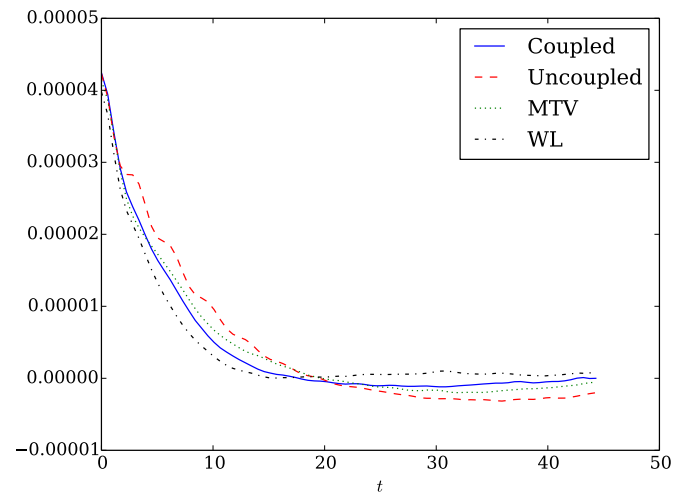

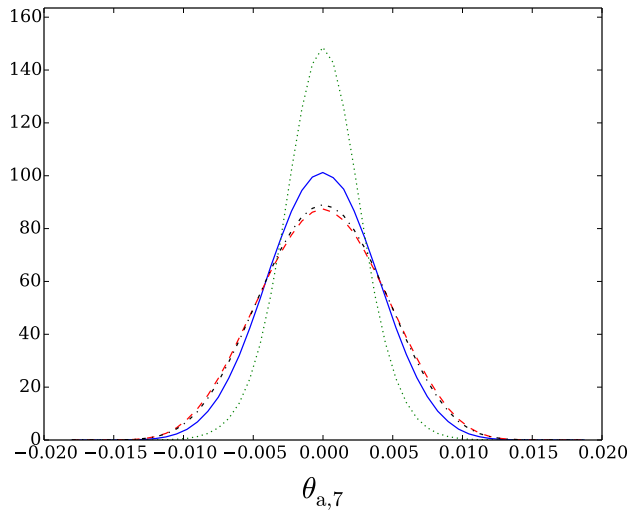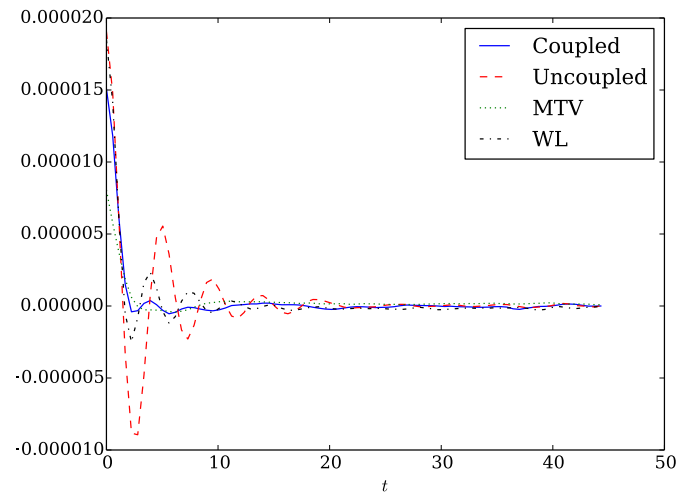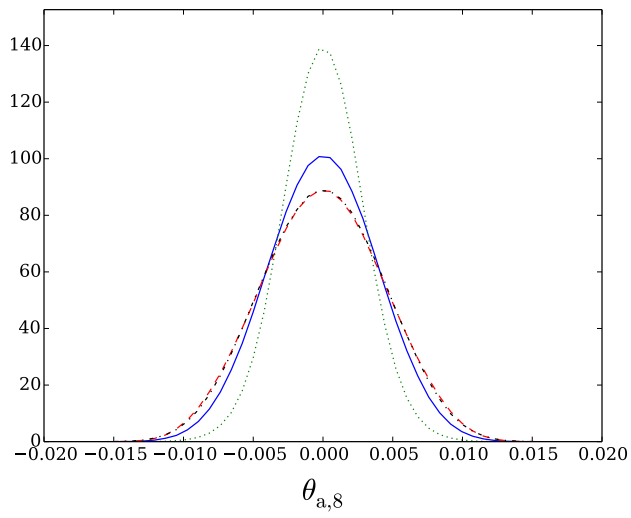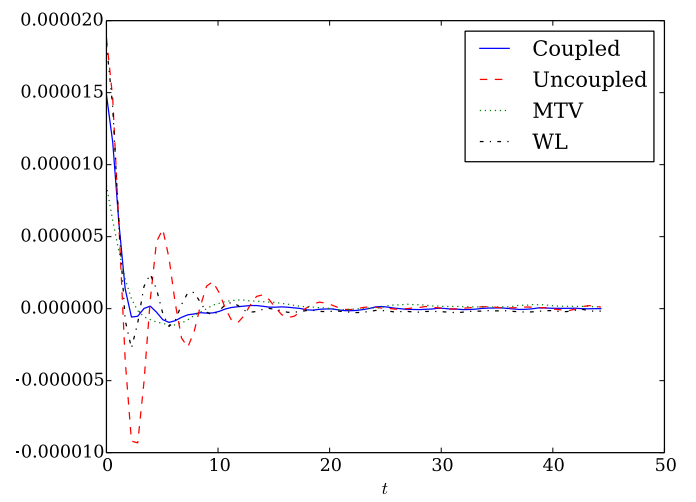

**Oceanic variables** Only the PDFs are available for these variables.

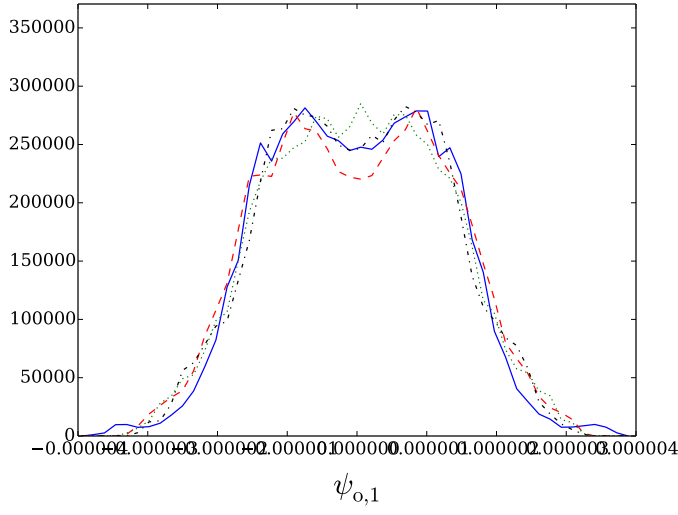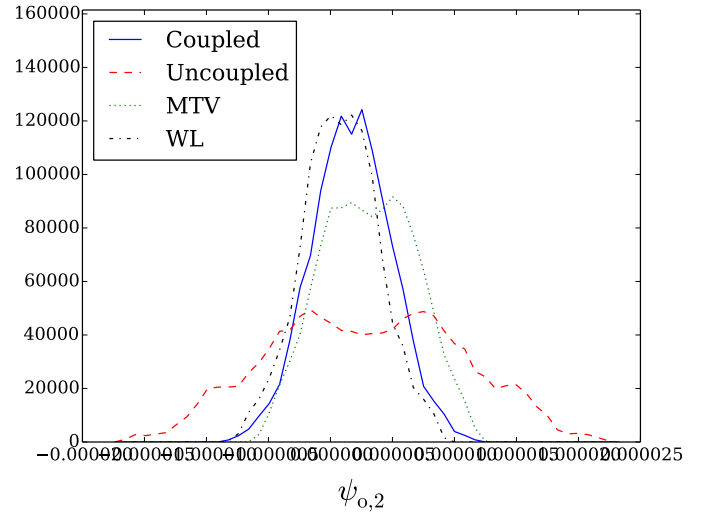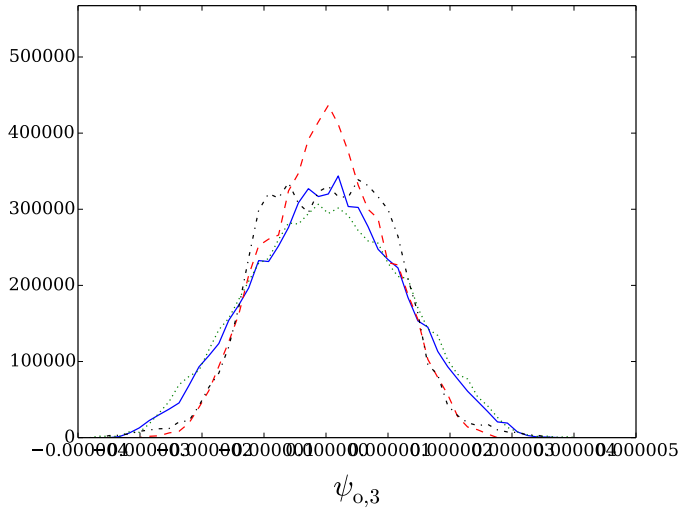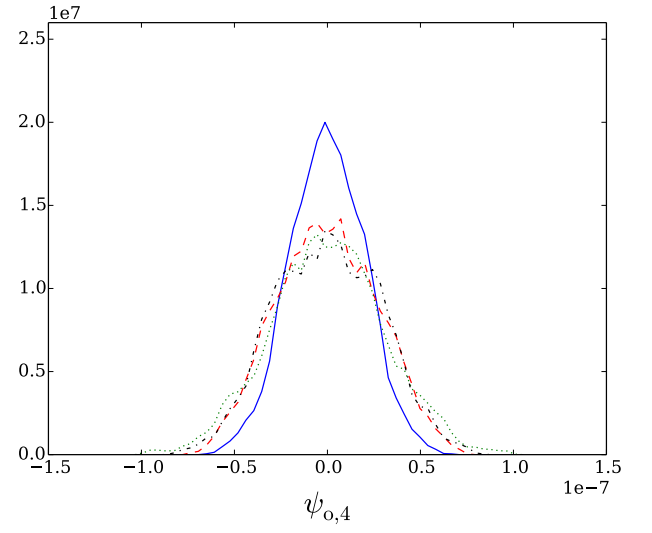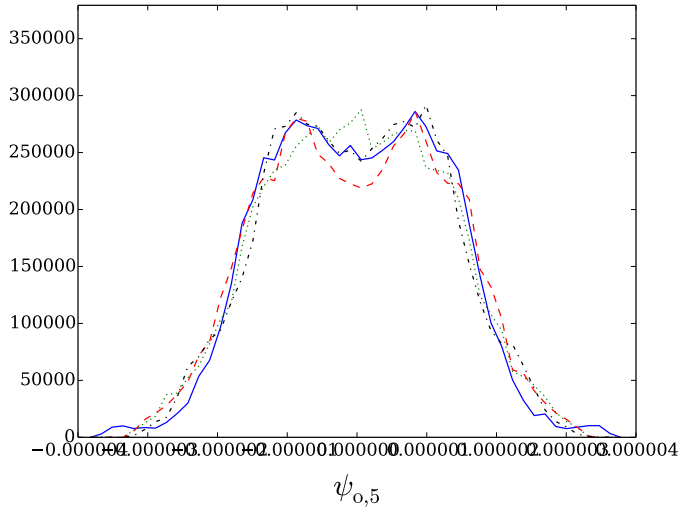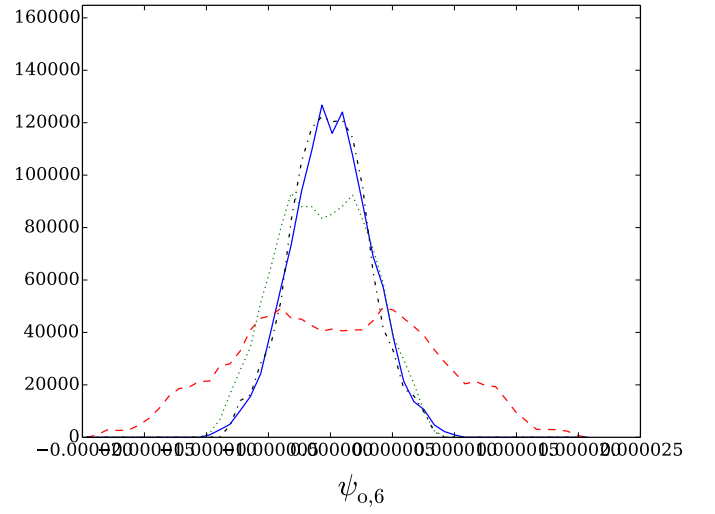

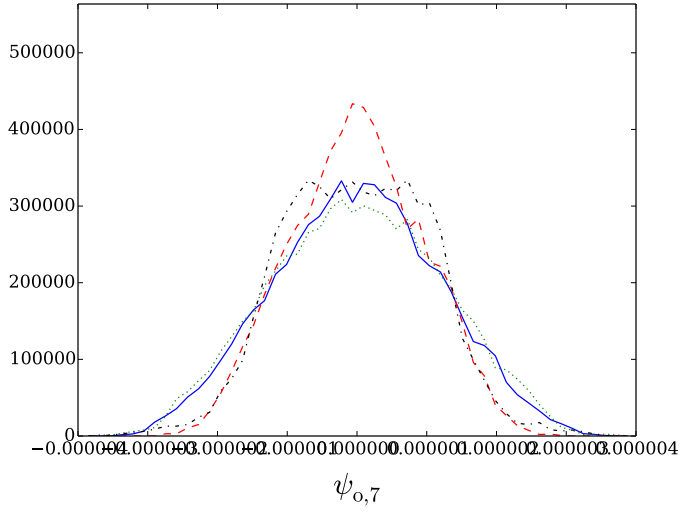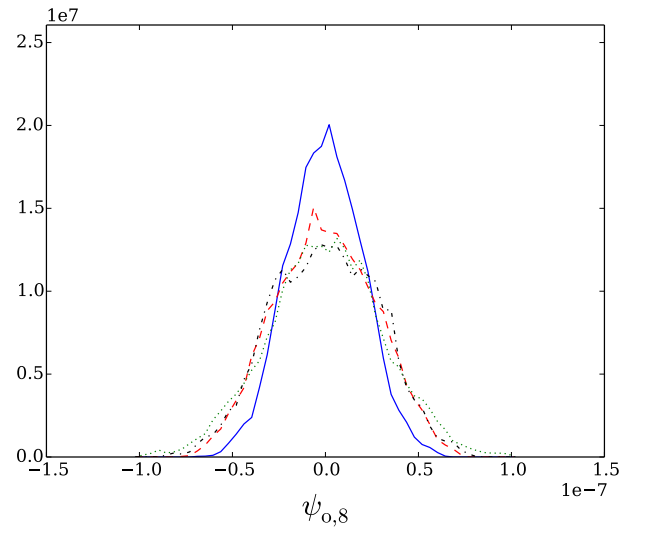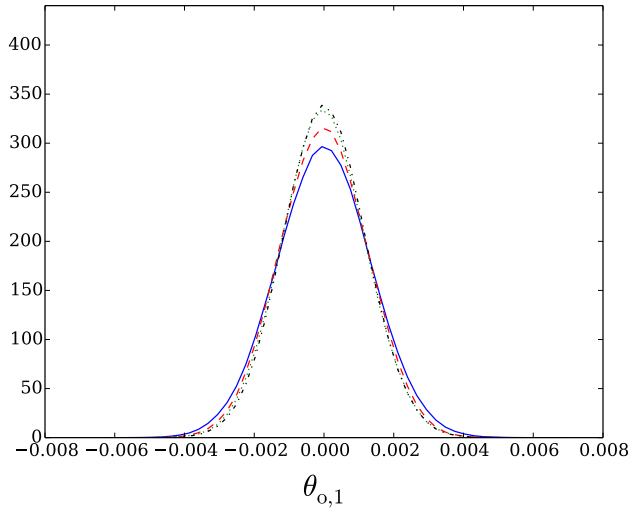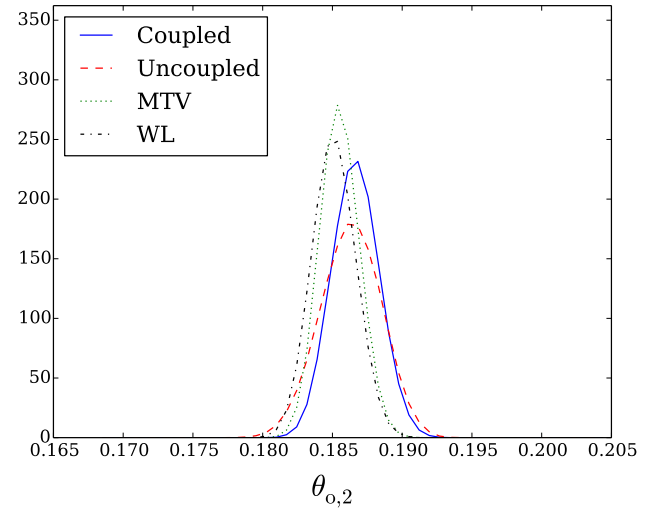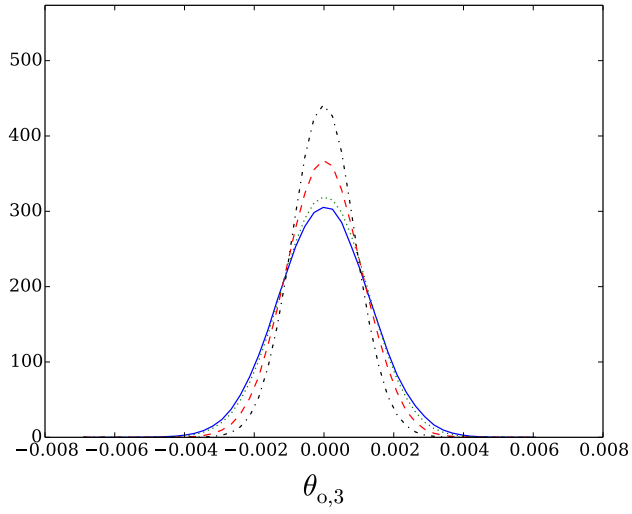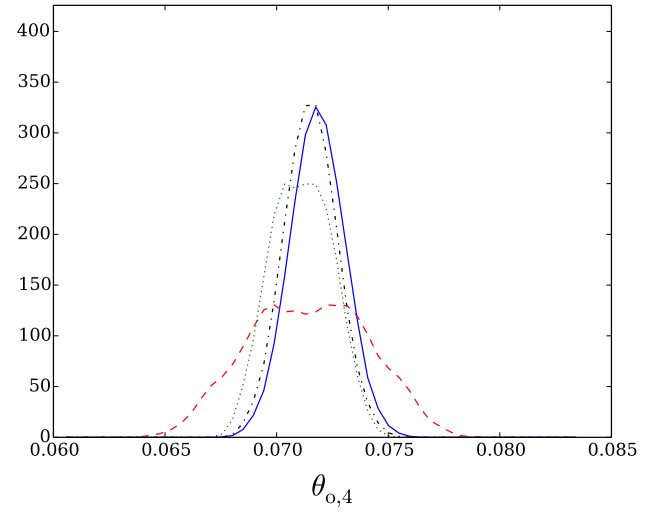

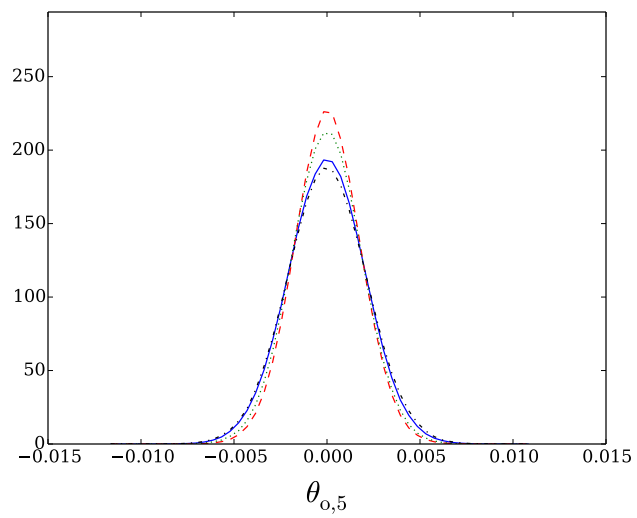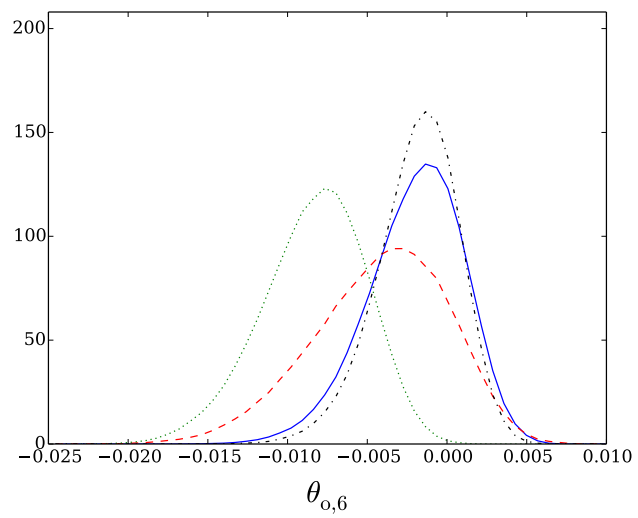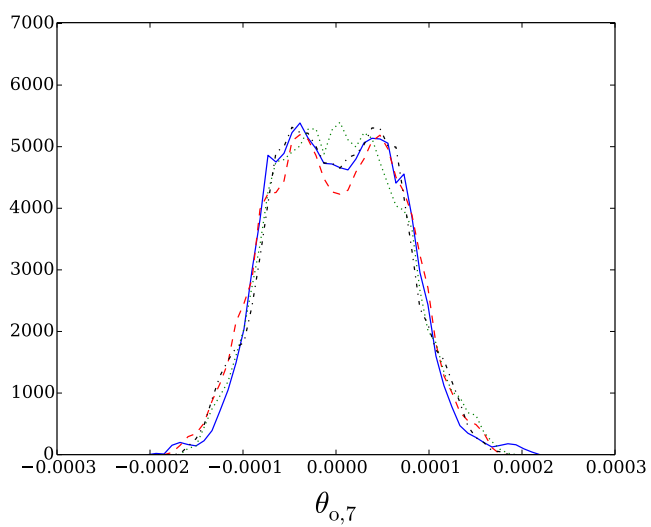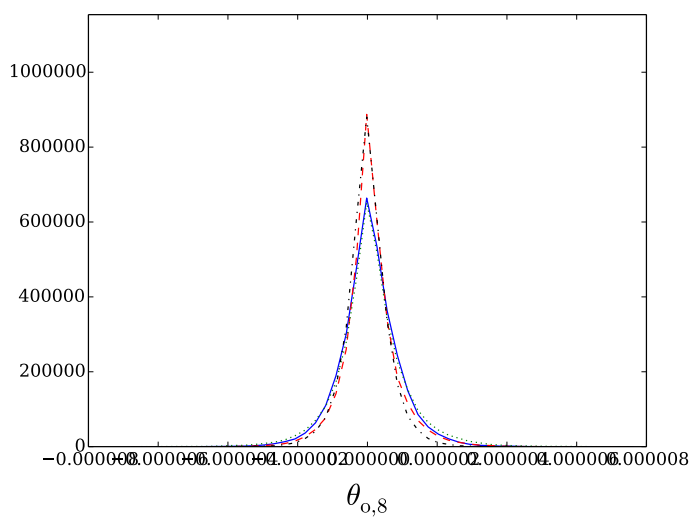

### 2.3.2 Kullback-Leibler divergences

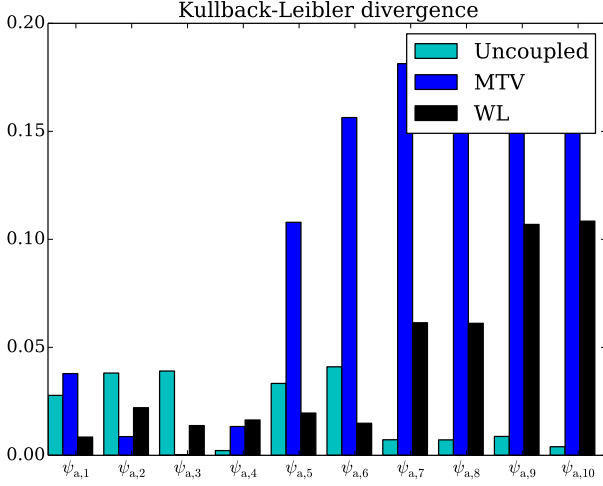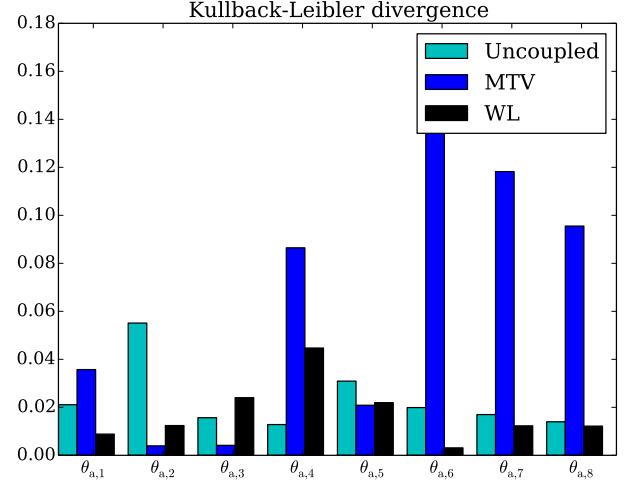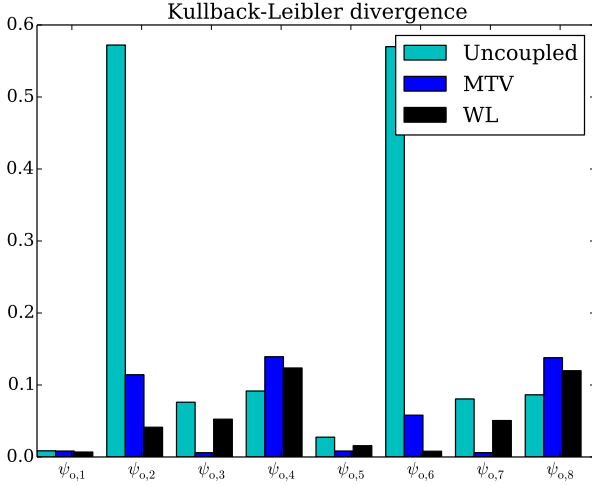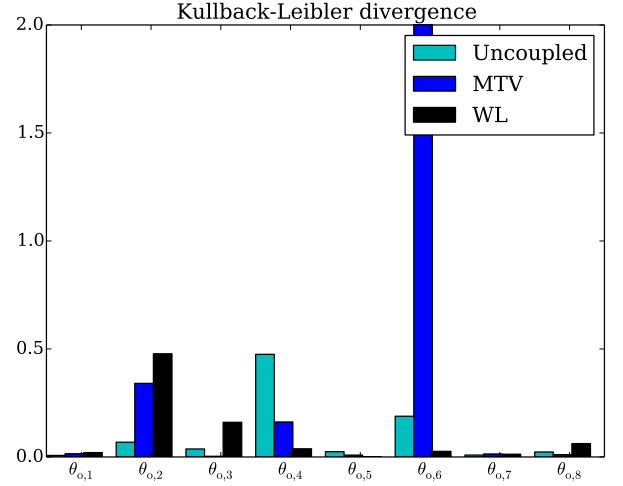

## 3 The parameterization of the atmospheric wavenumber 2 and $F_4$ modes

All the figures compiled in this section are related to the experiment described in the section 4.1.4 and concern the “DV2017” and “noLFV” parameter sets.

### 3.1 DV2017 parameter set

#### 3.1.1 PDFs and autocorrelation functions of the resolved variables

Atmospheric variables of the model.

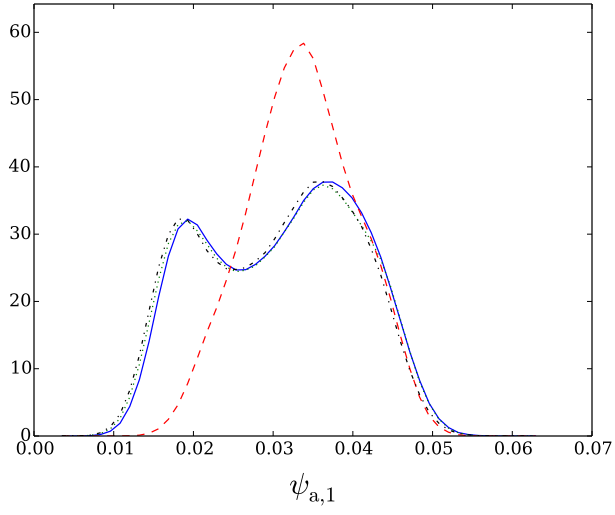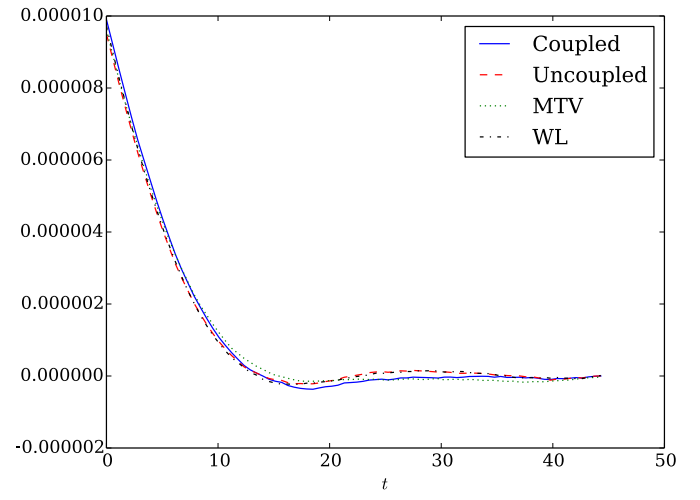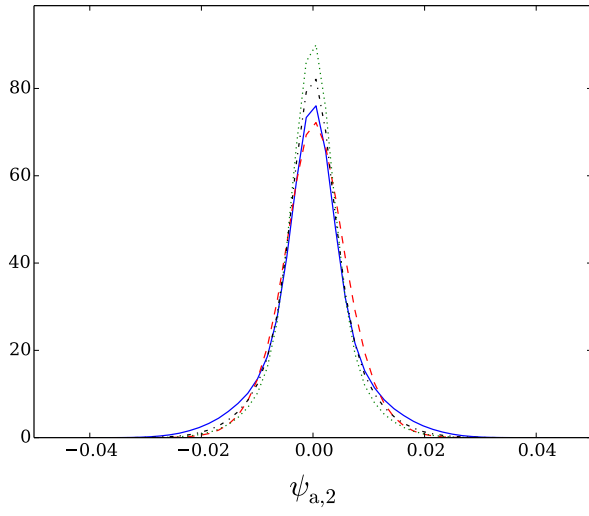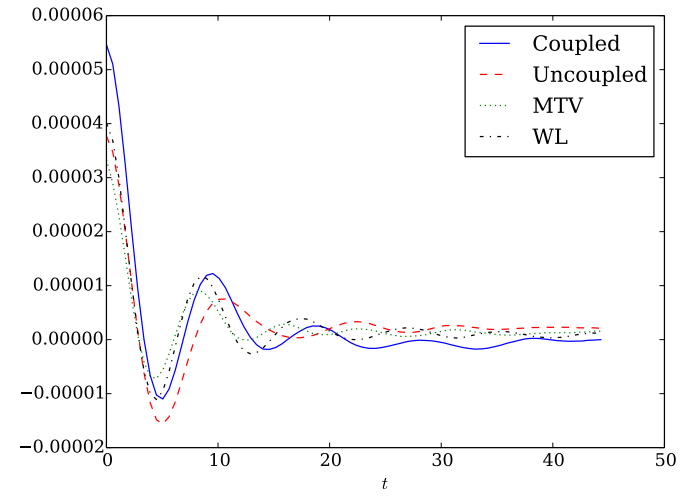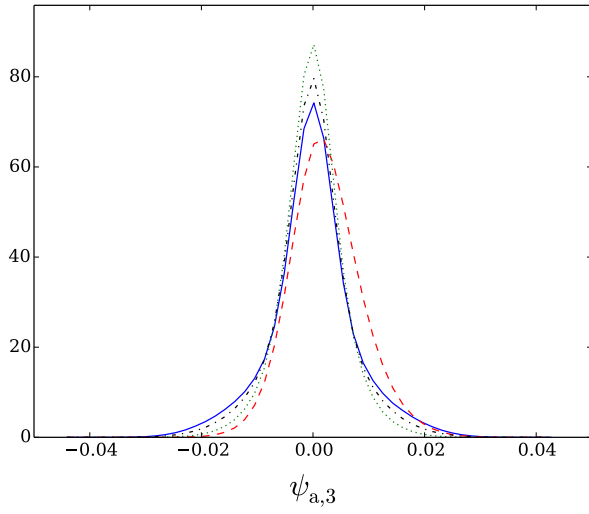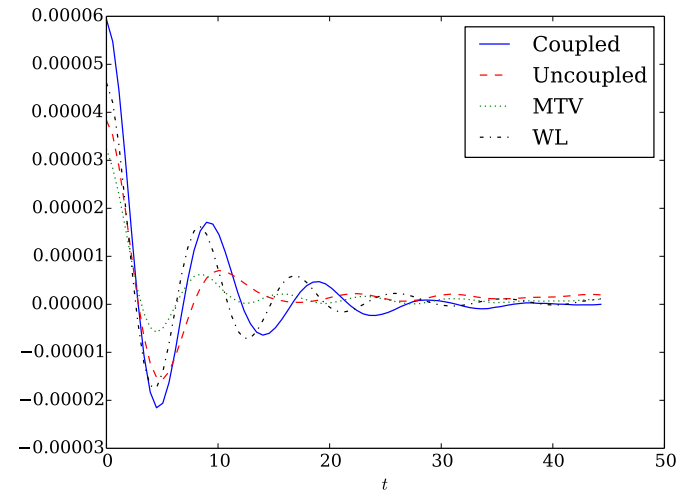

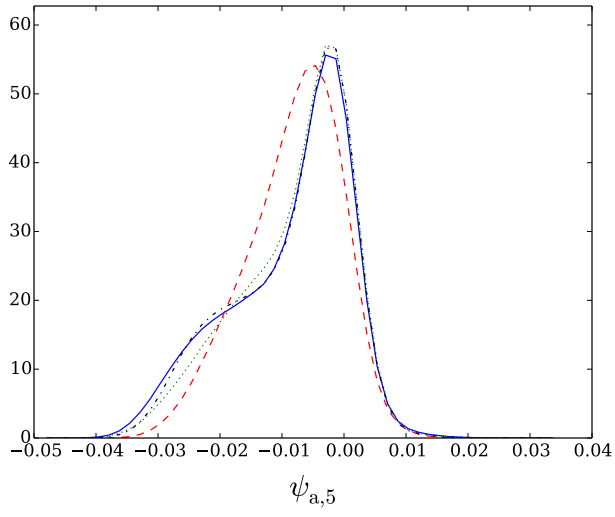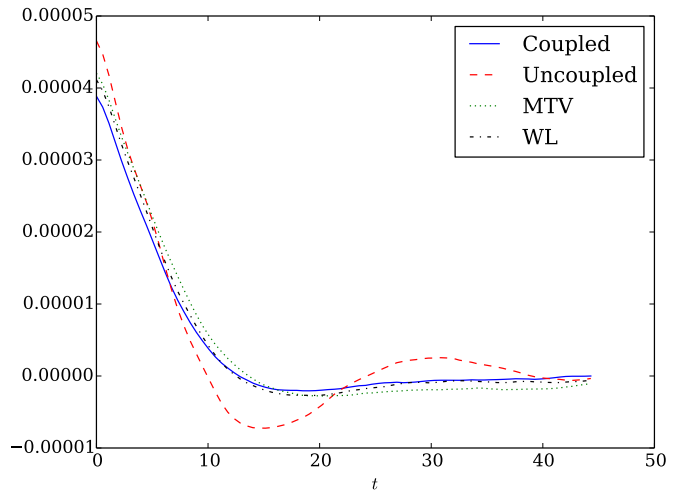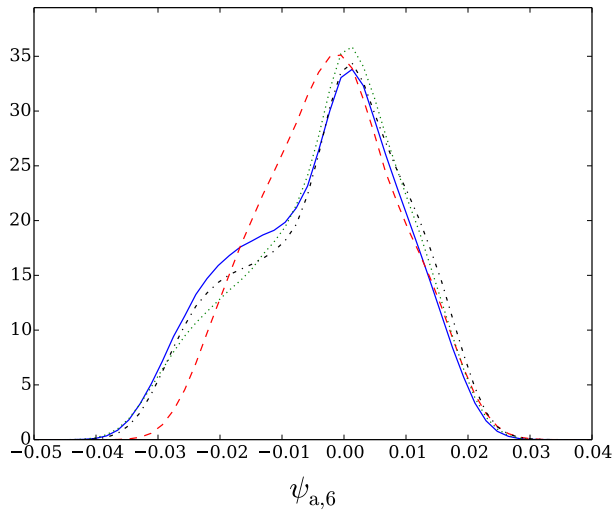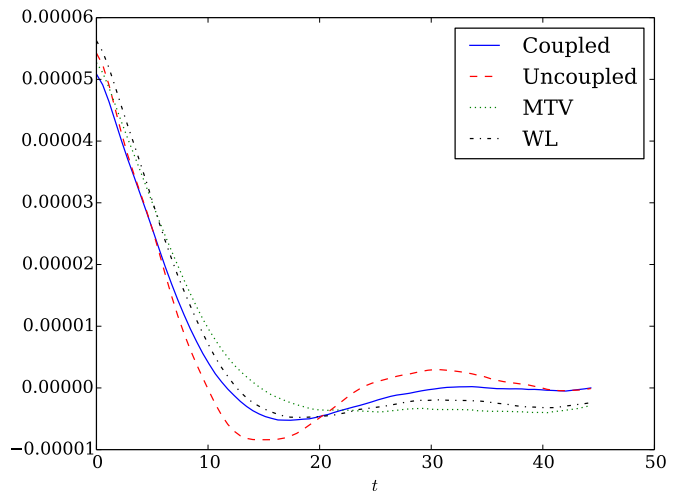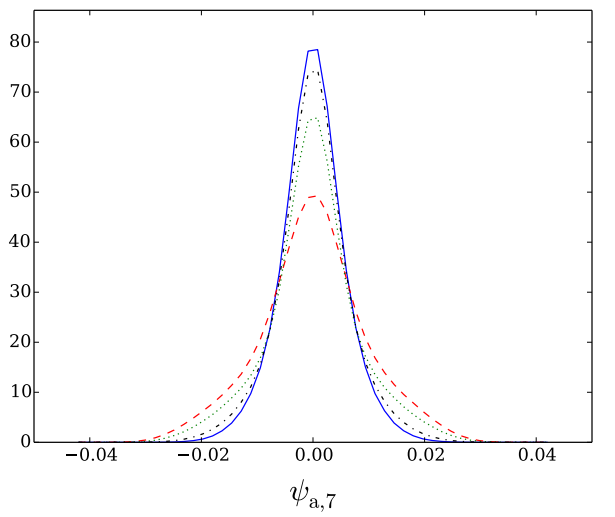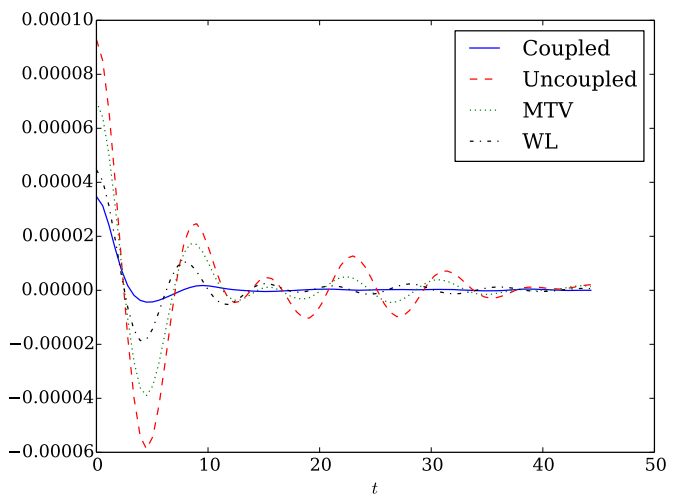

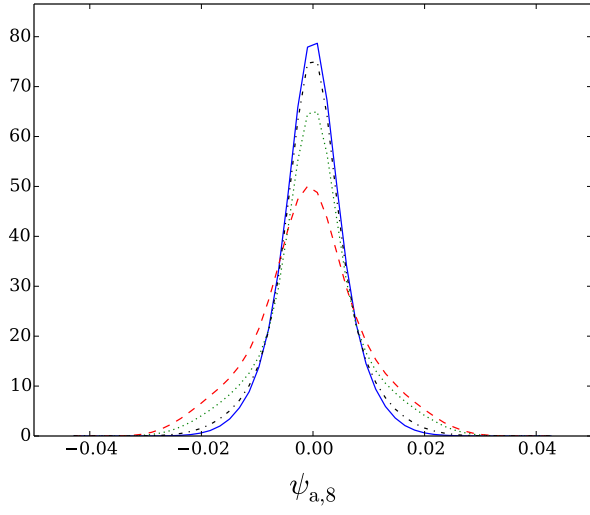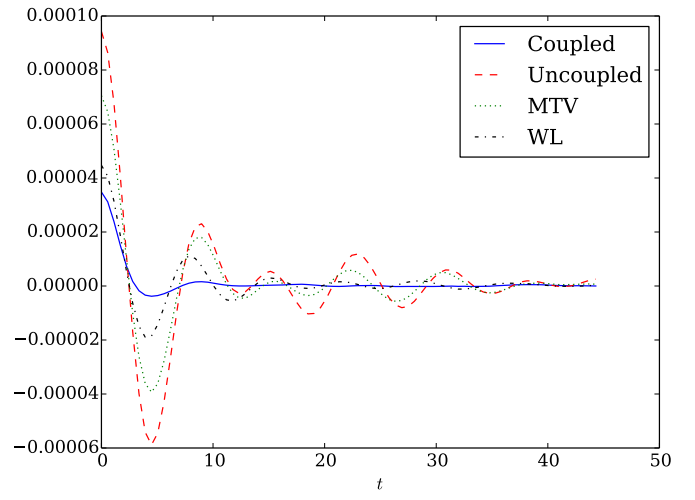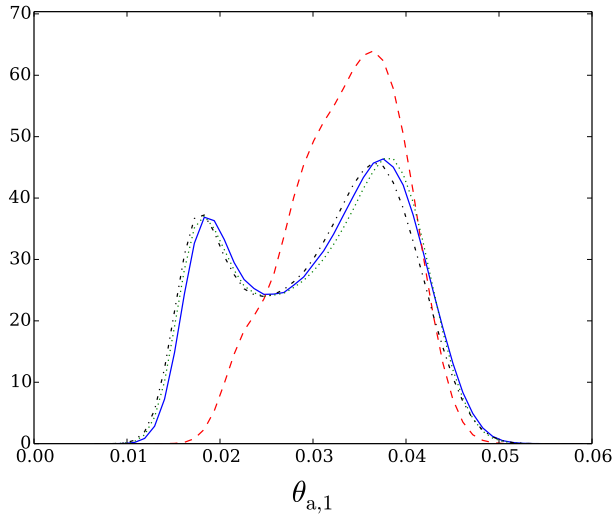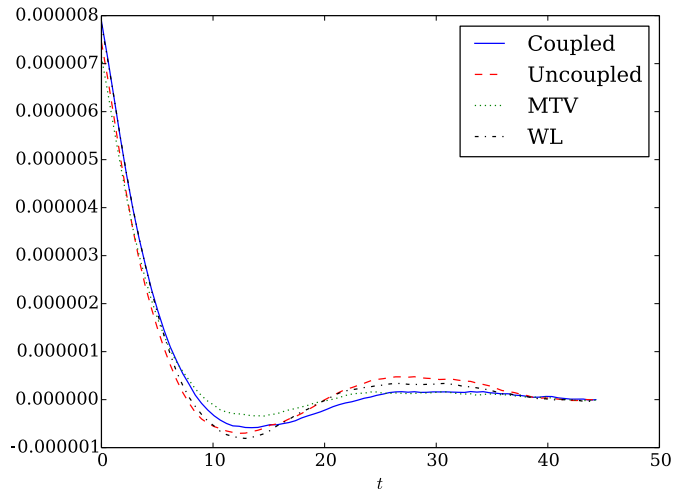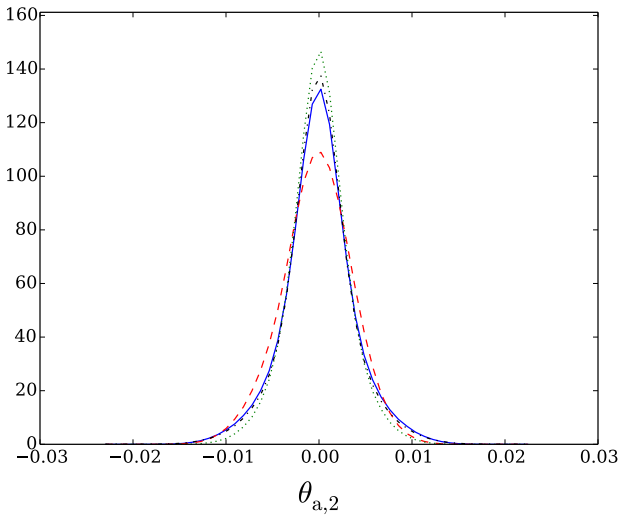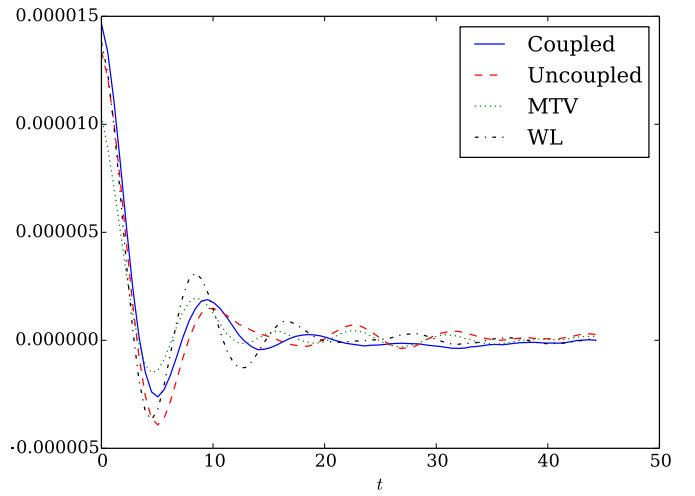

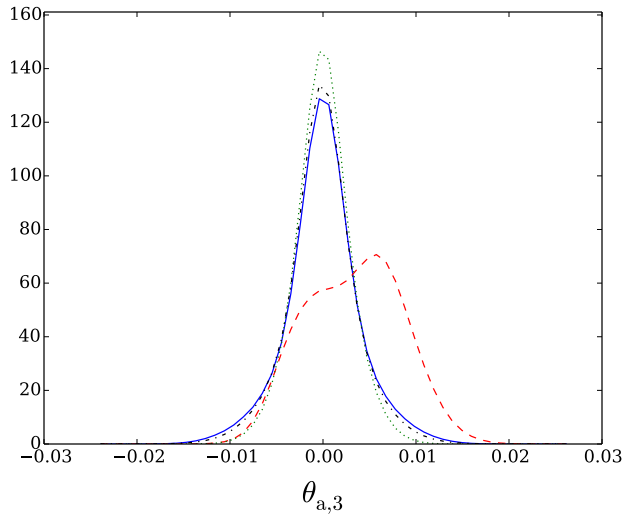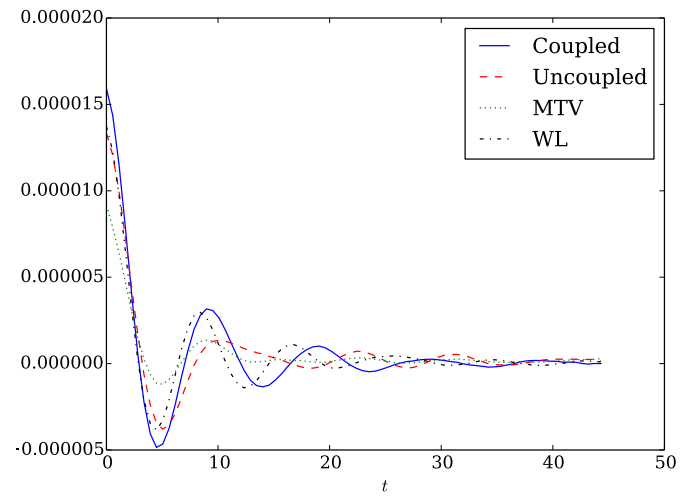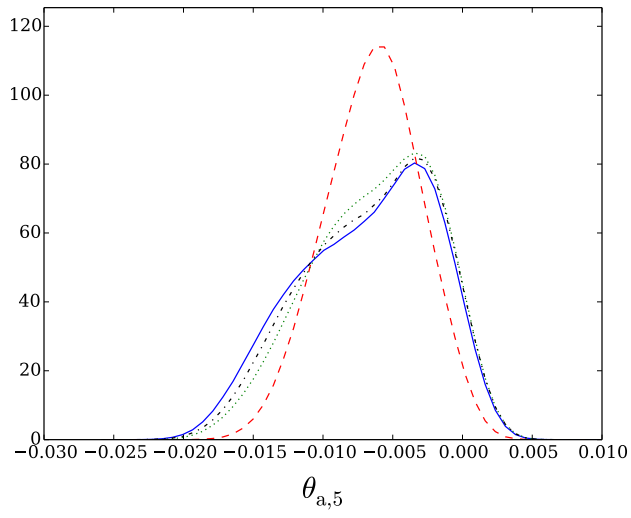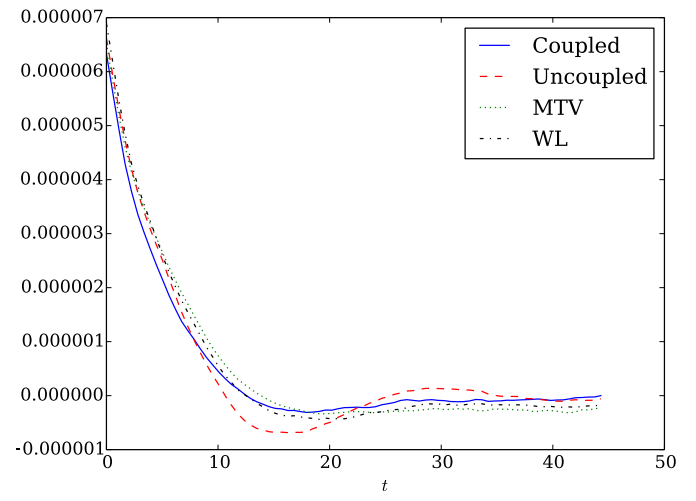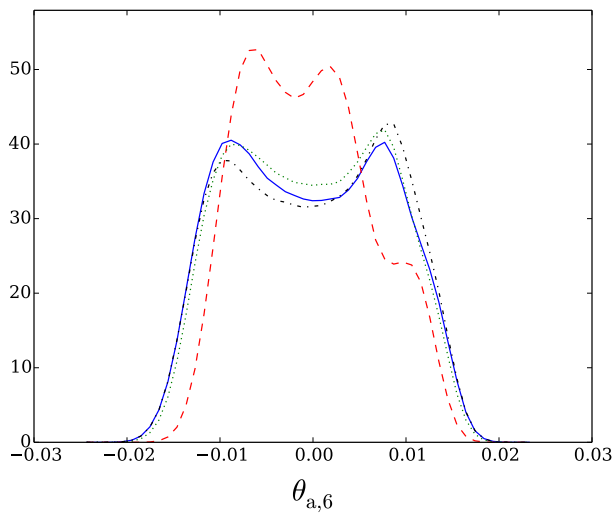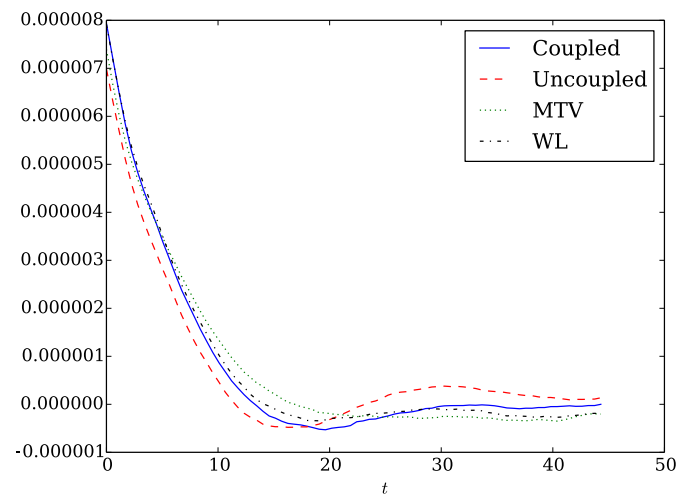

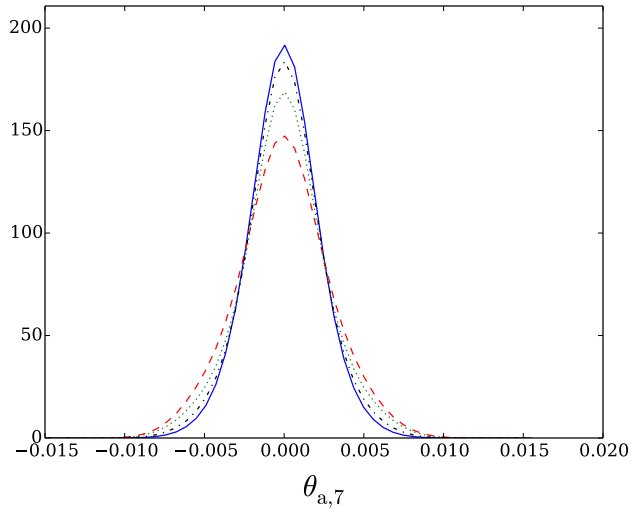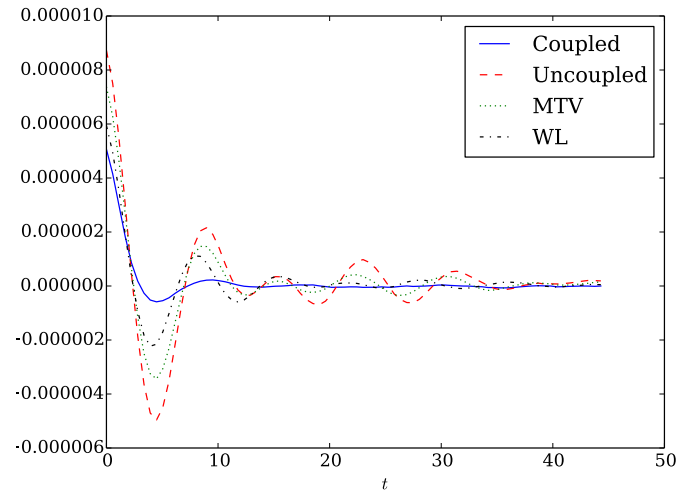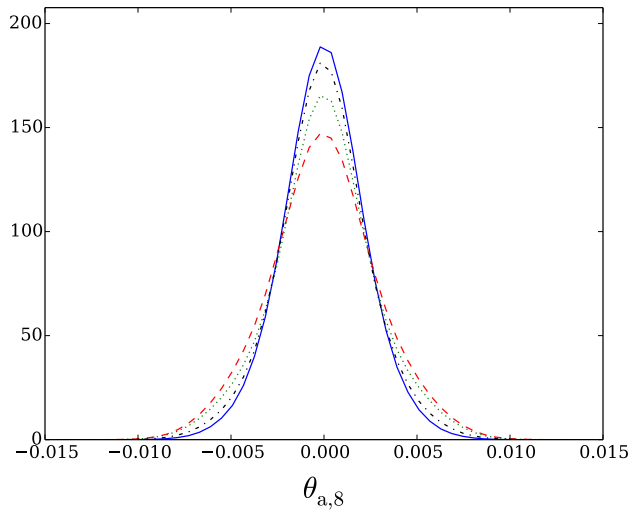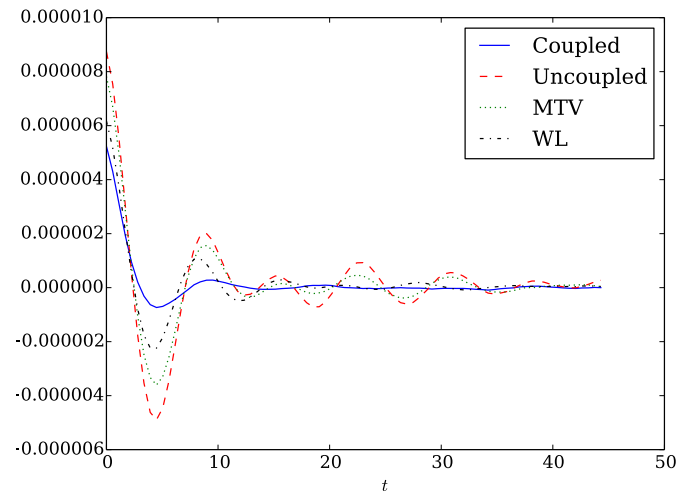

**Oceanic variables** Only the PDFs are available for these variables.

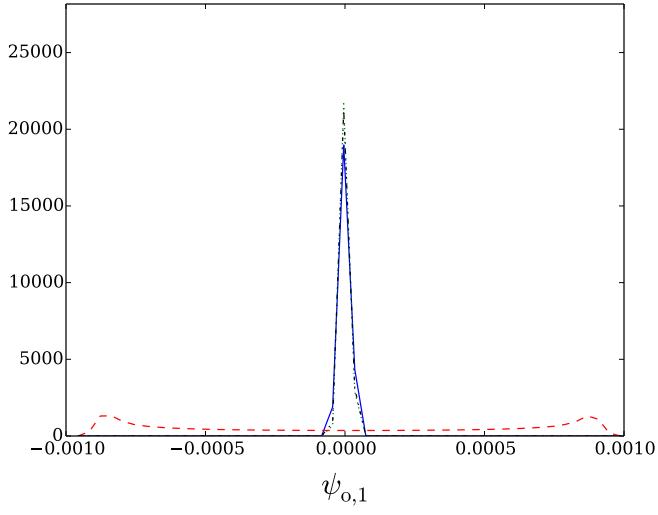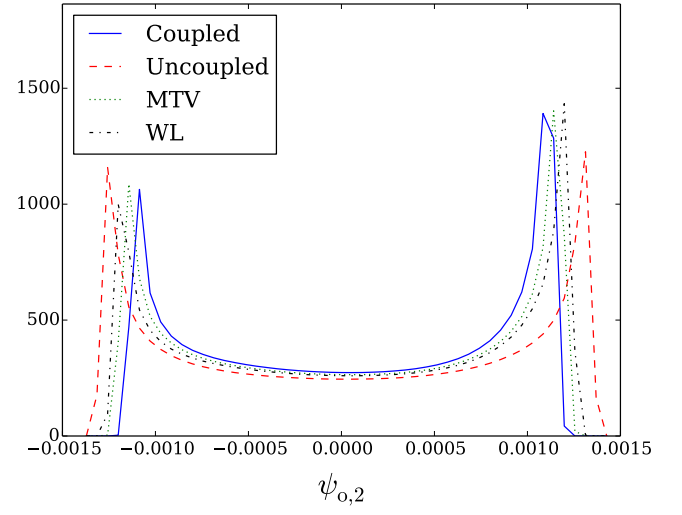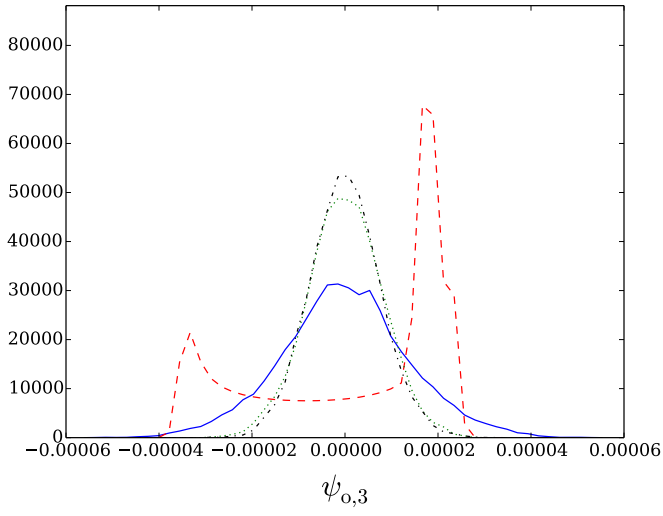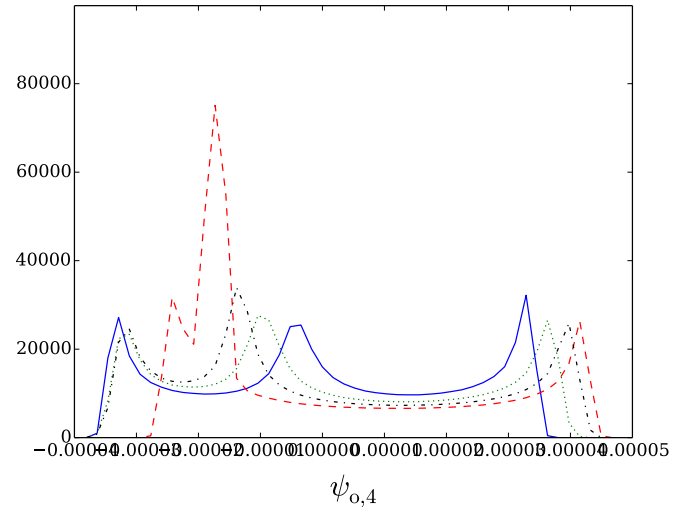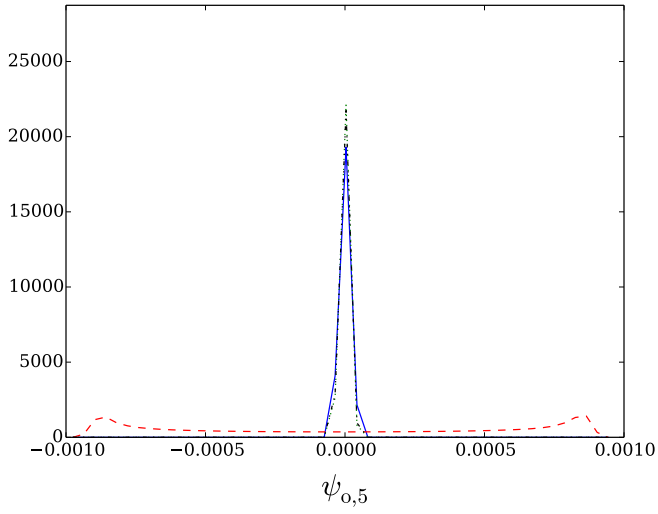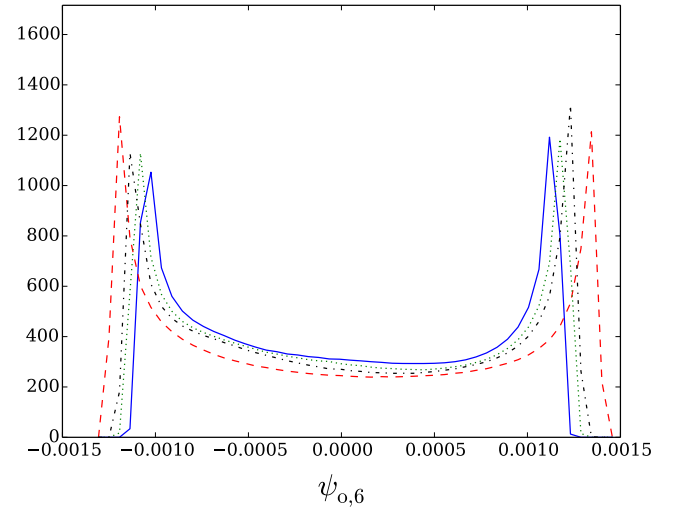

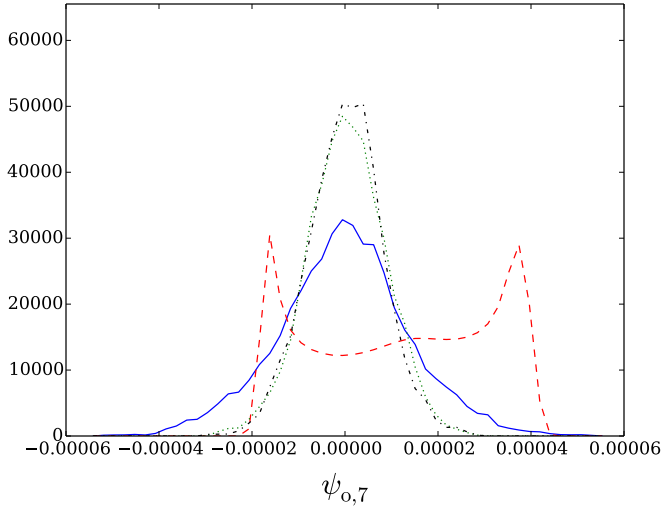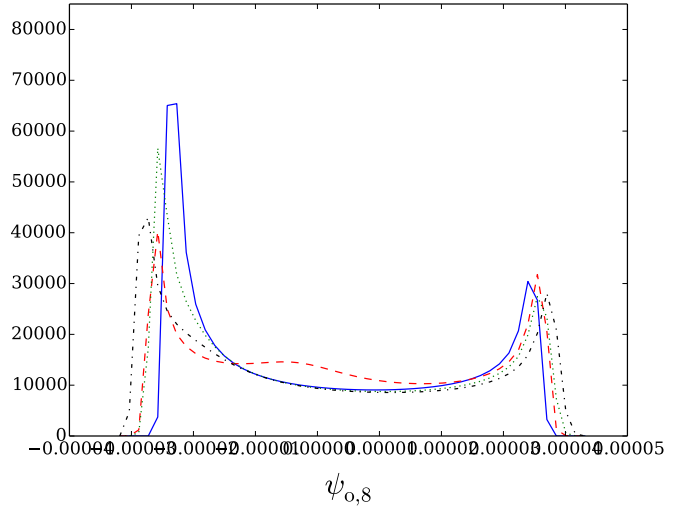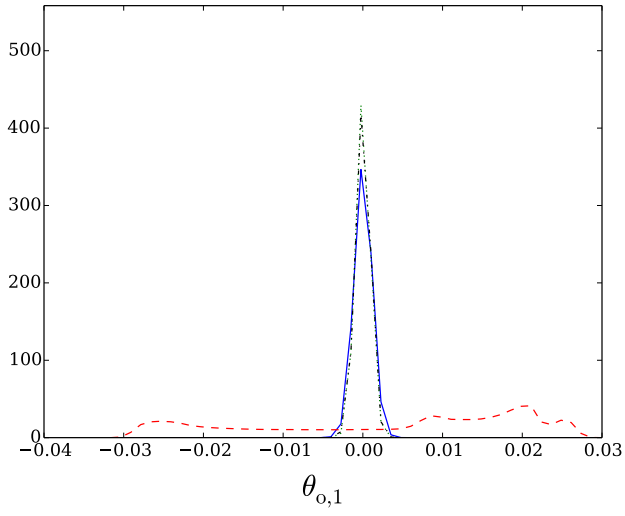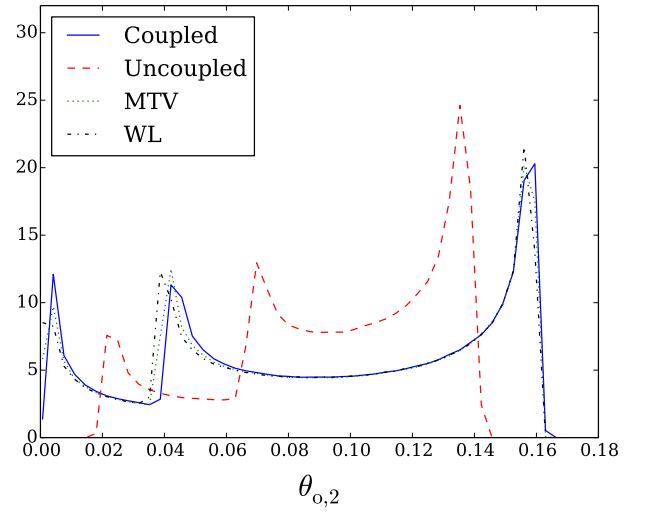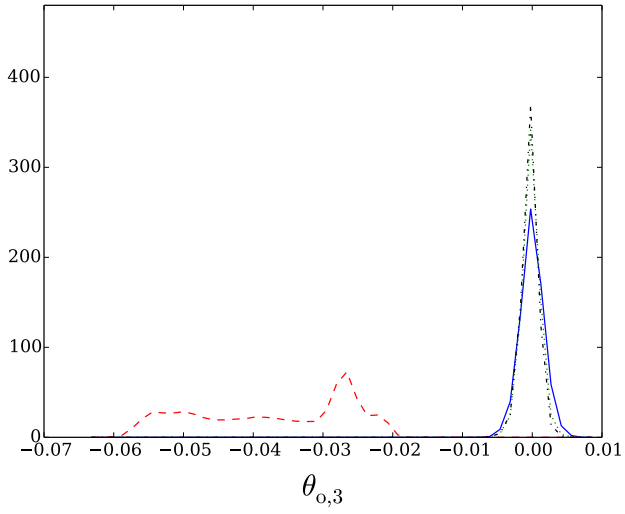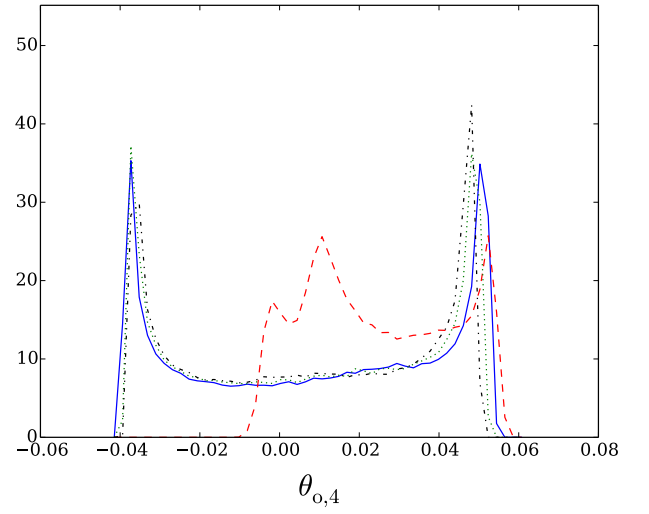

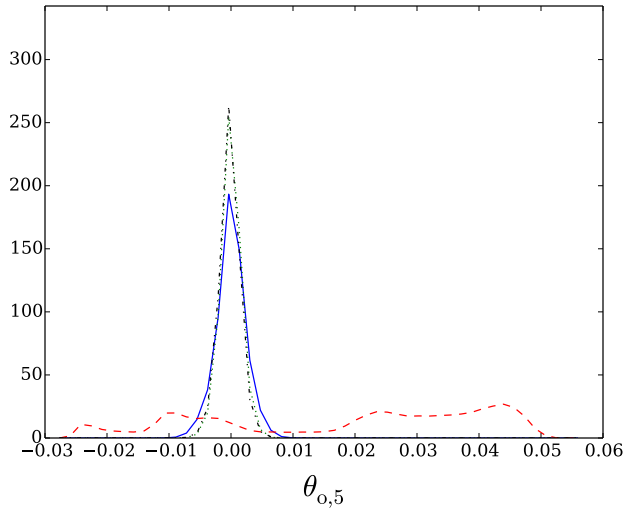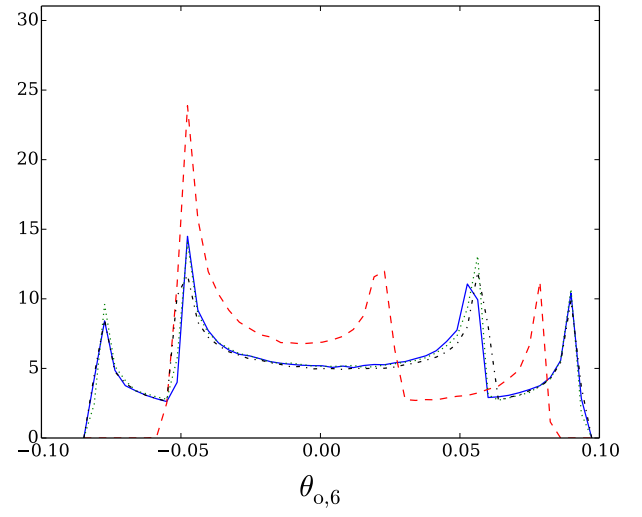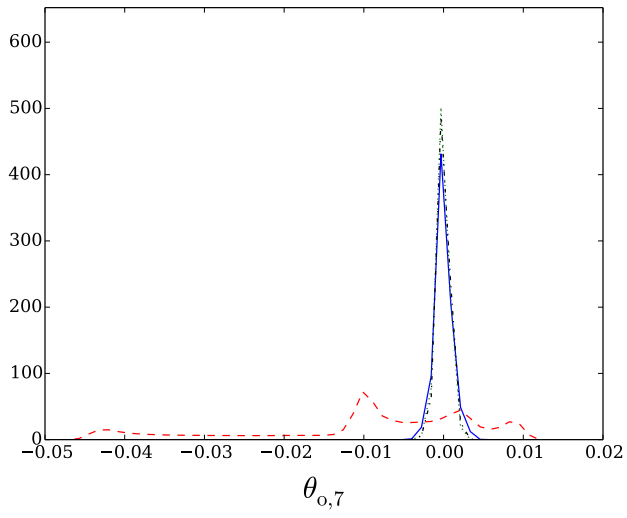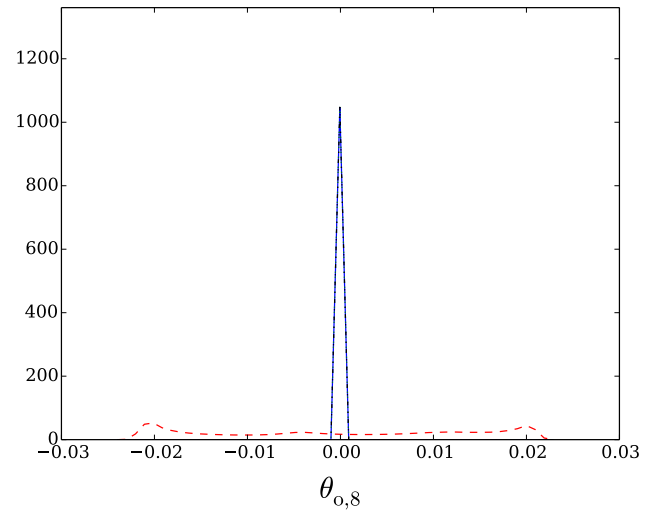

### 3.1.2 Kullback-Leibler divergences

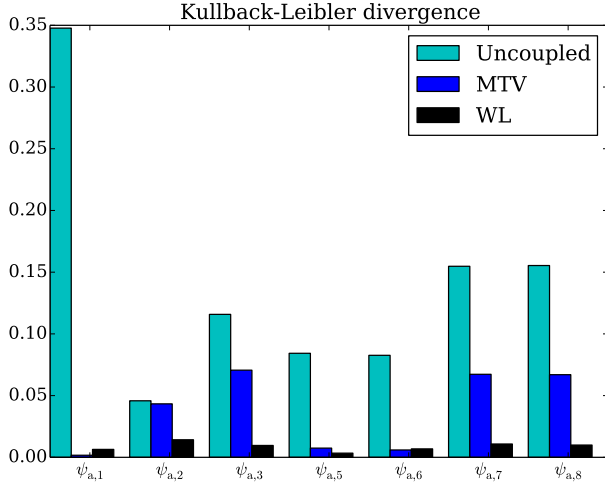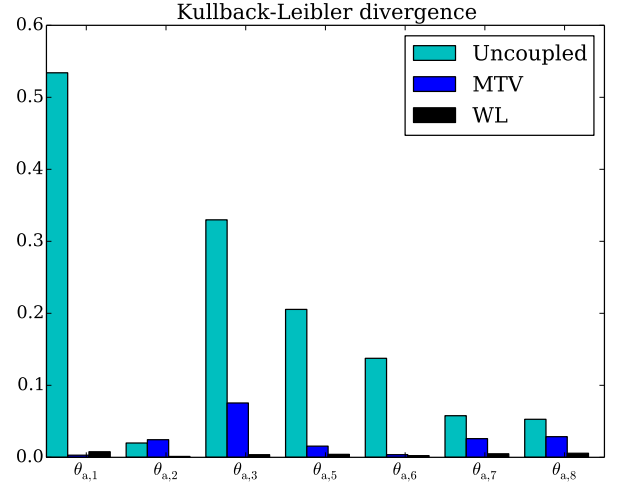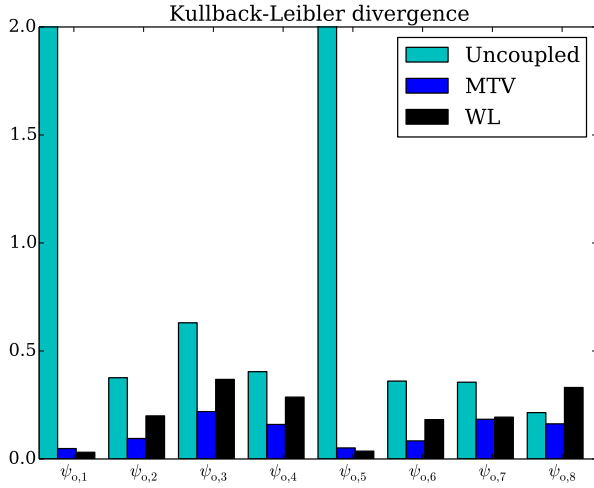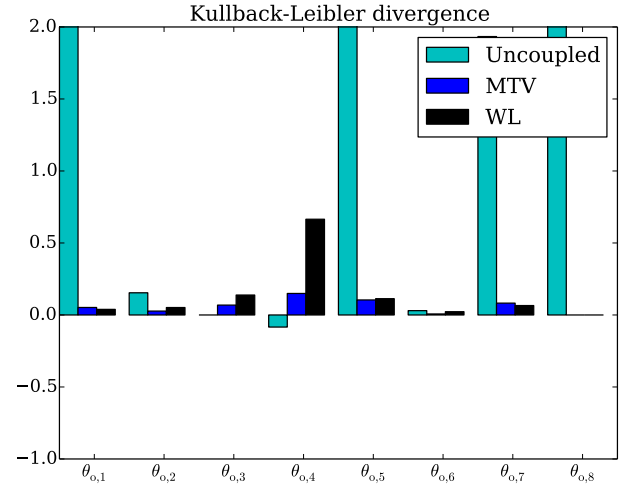

## 3.2 noLFV parameter set

### 3.2.1 PDFs and autocorrelation functions of the resolved variables

Atmospheric variables of the model.

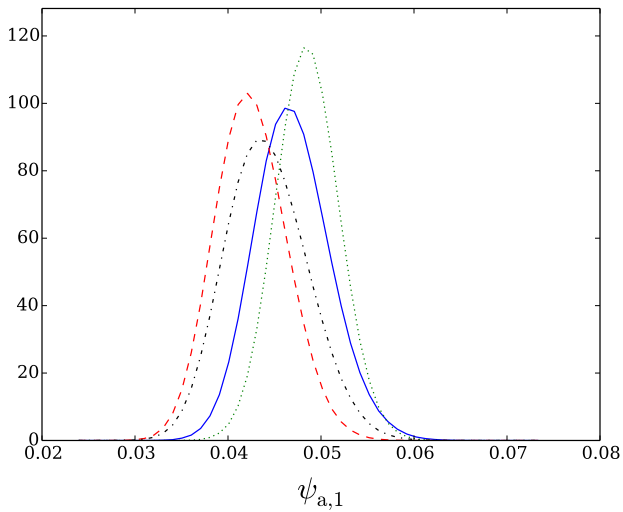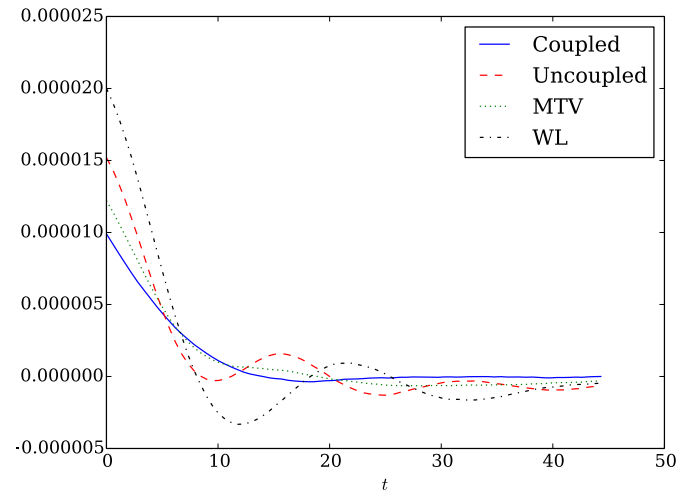

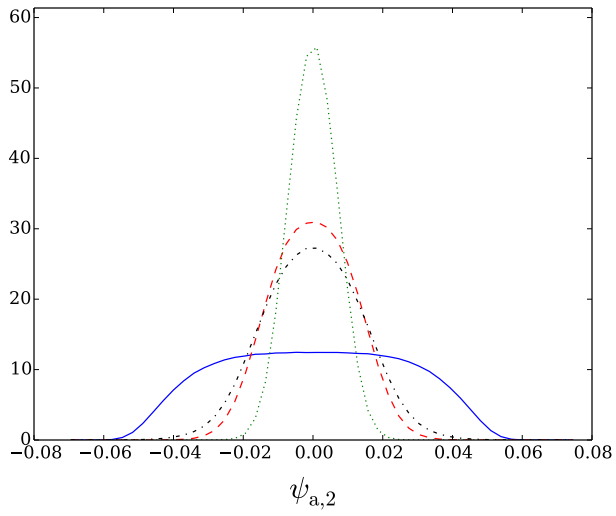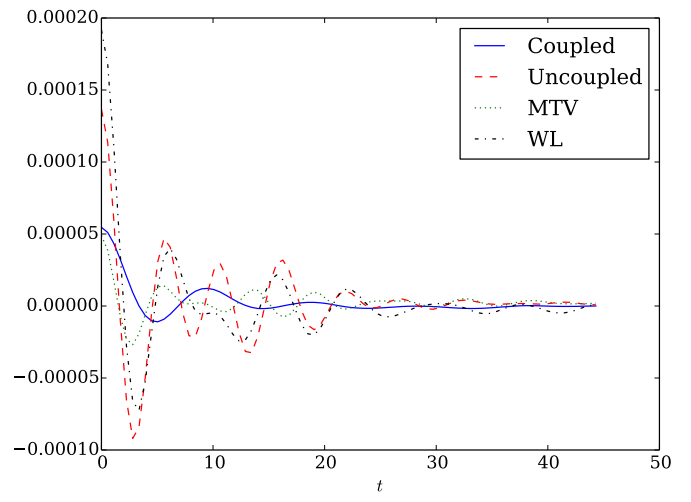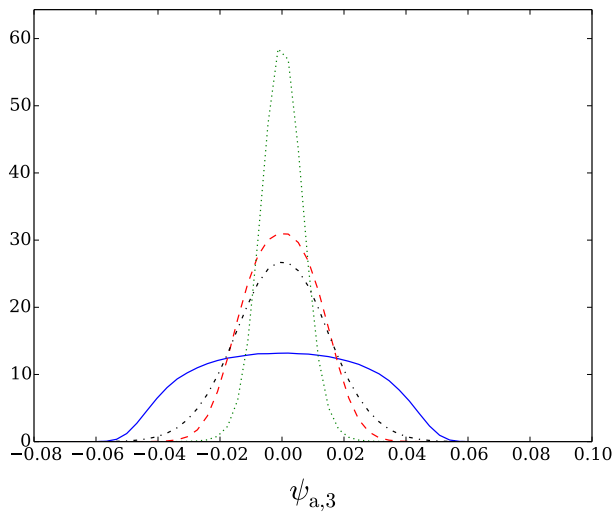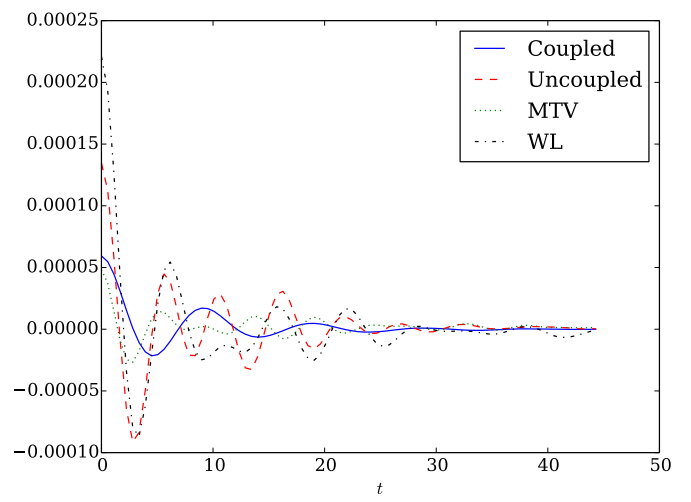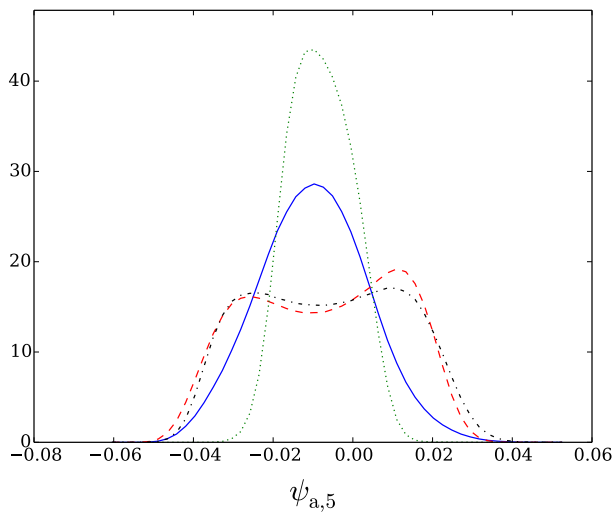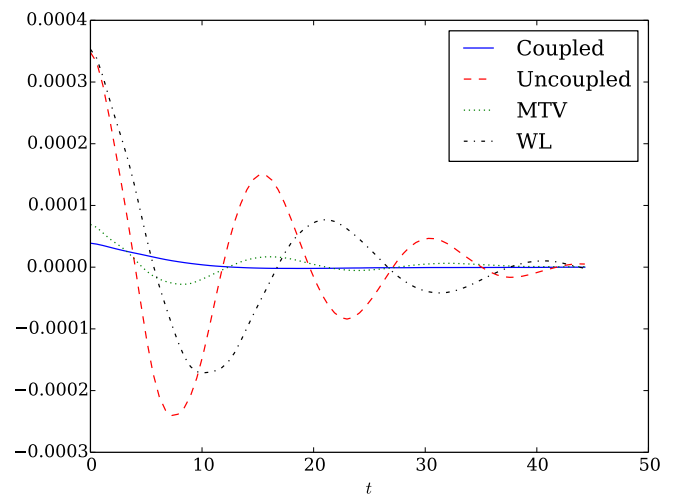

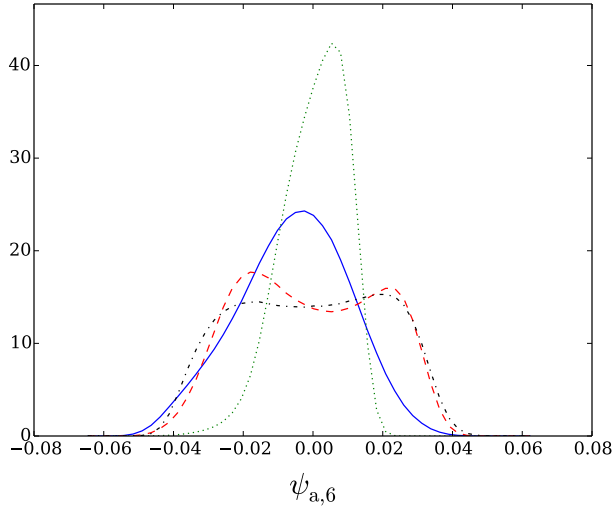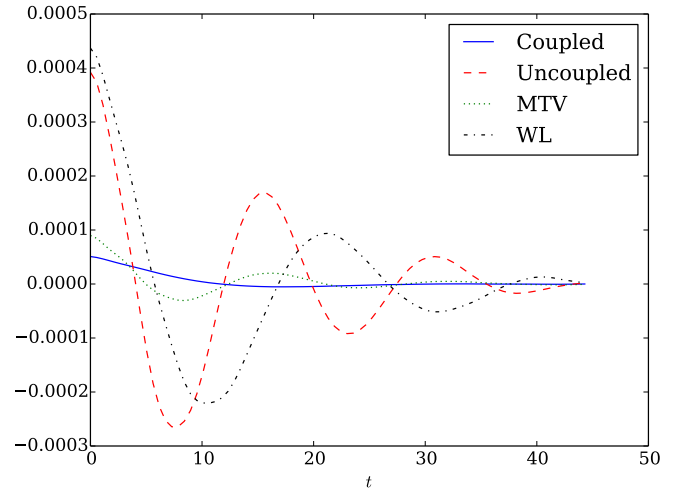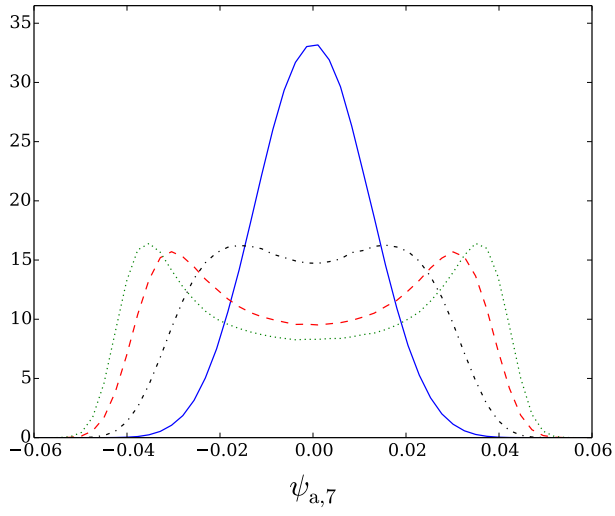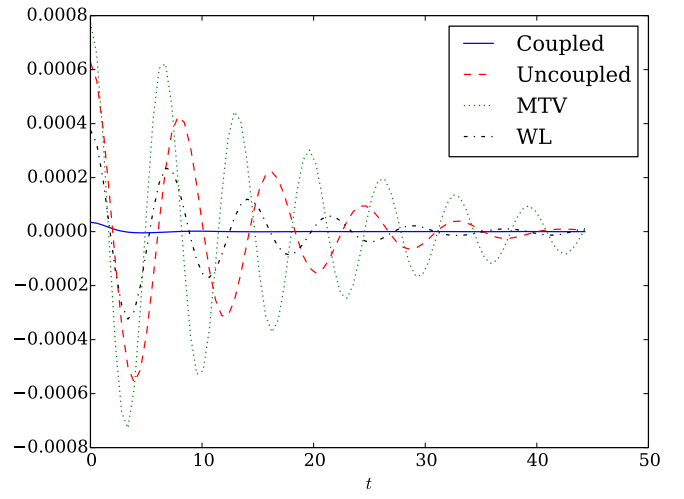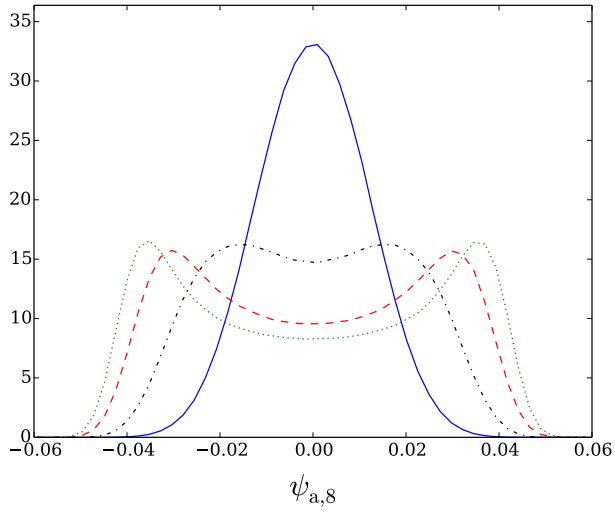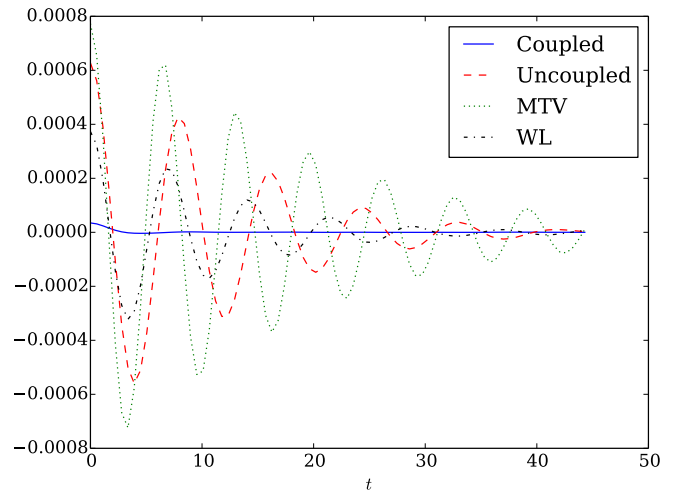

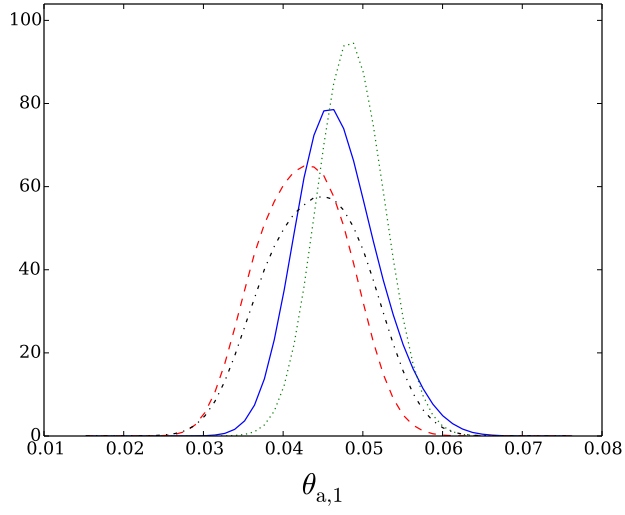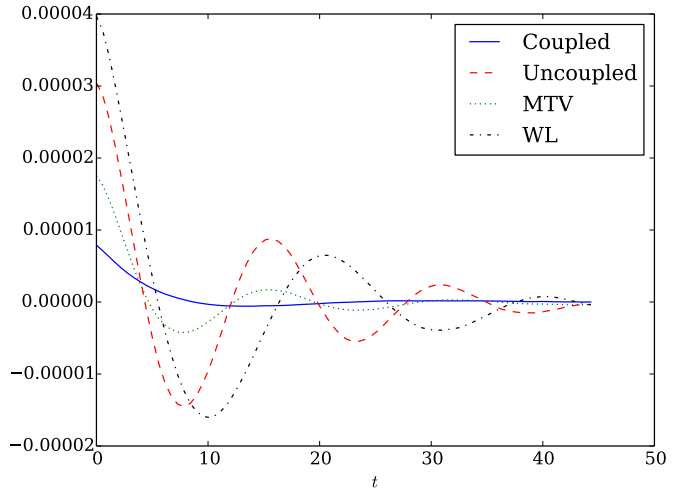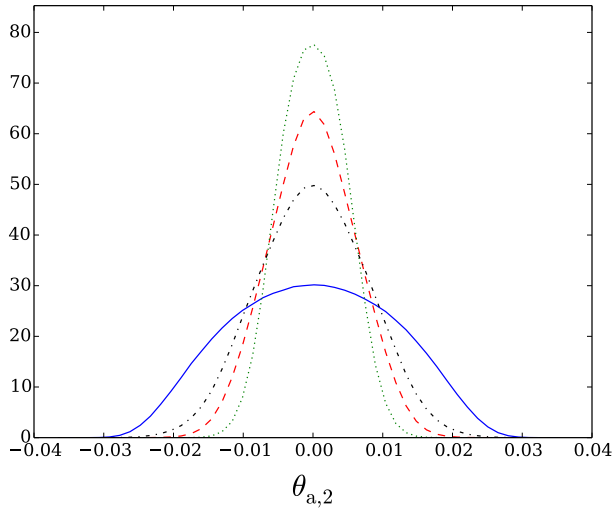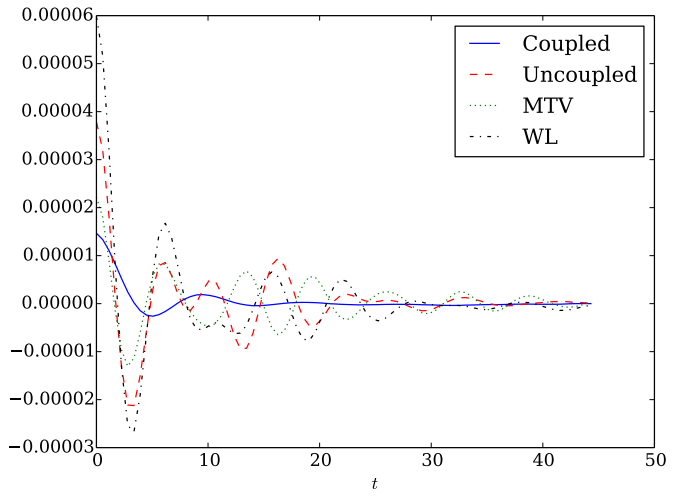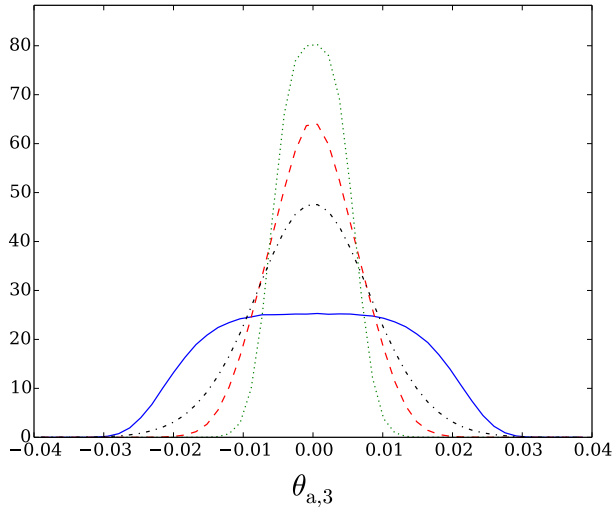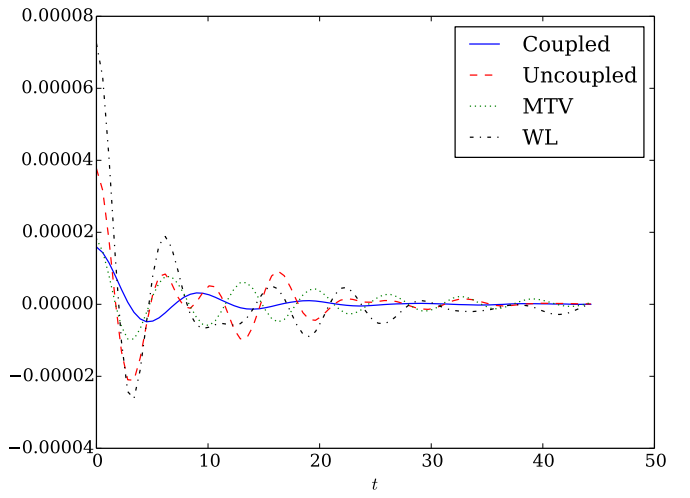

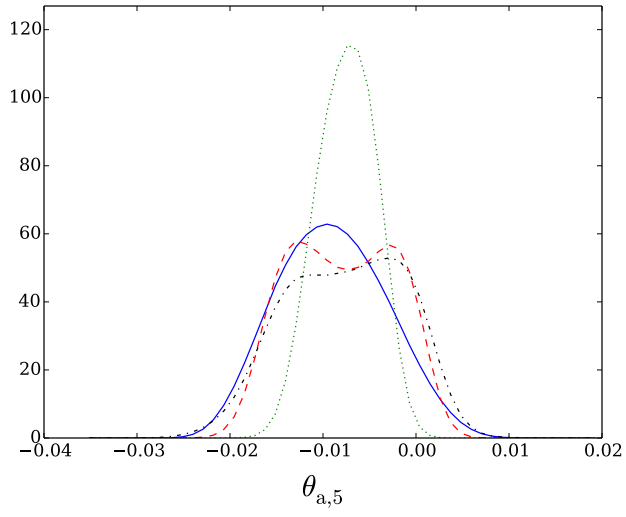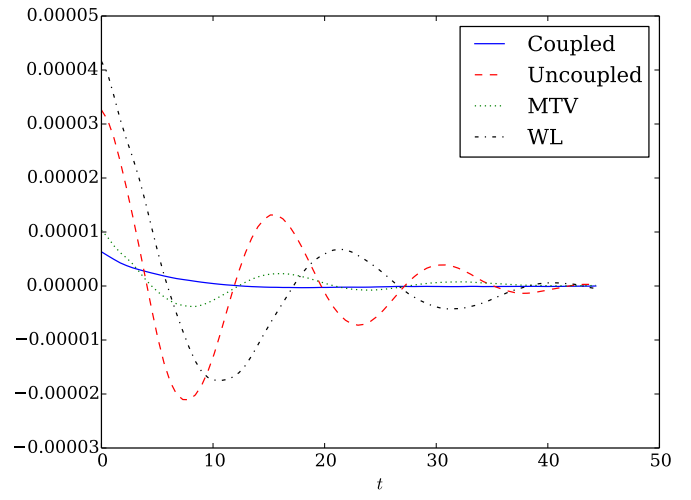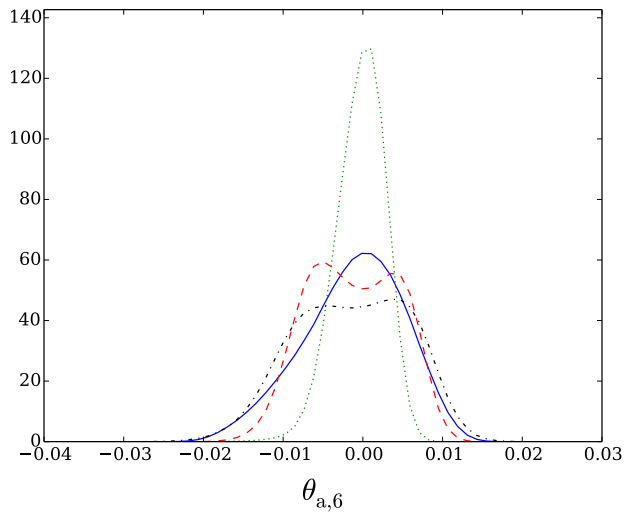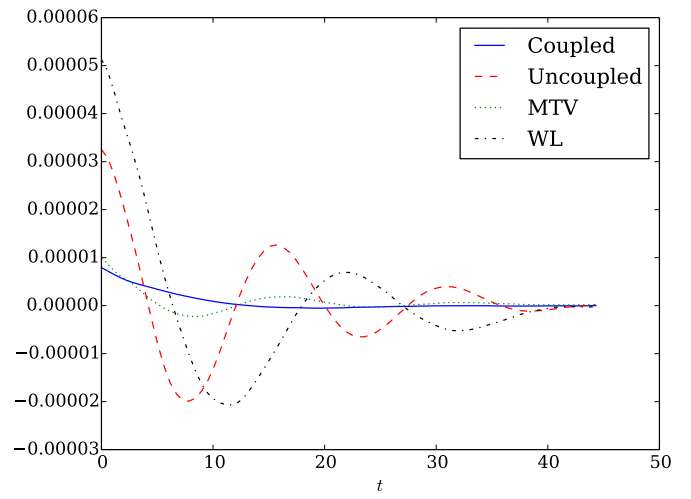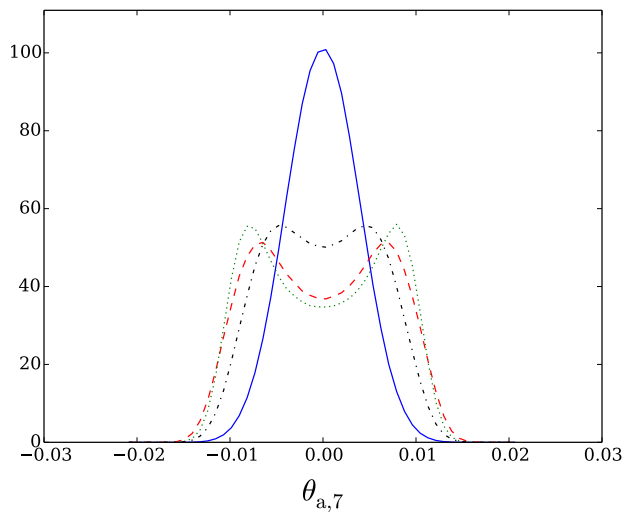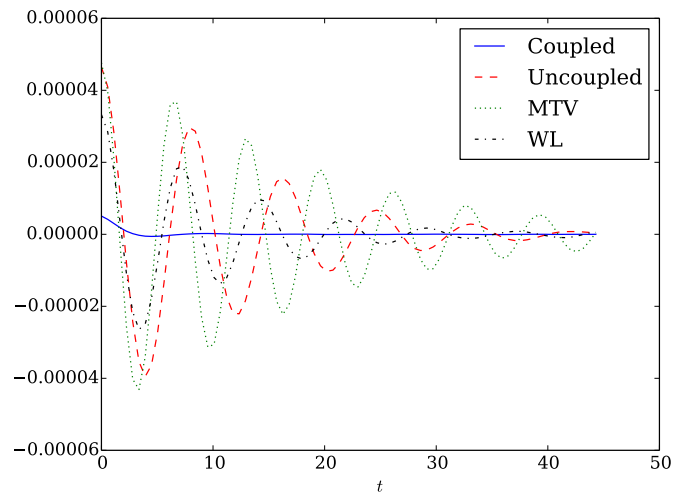

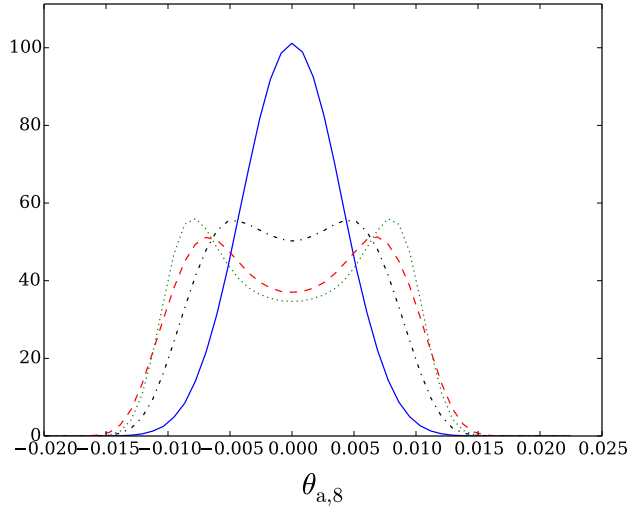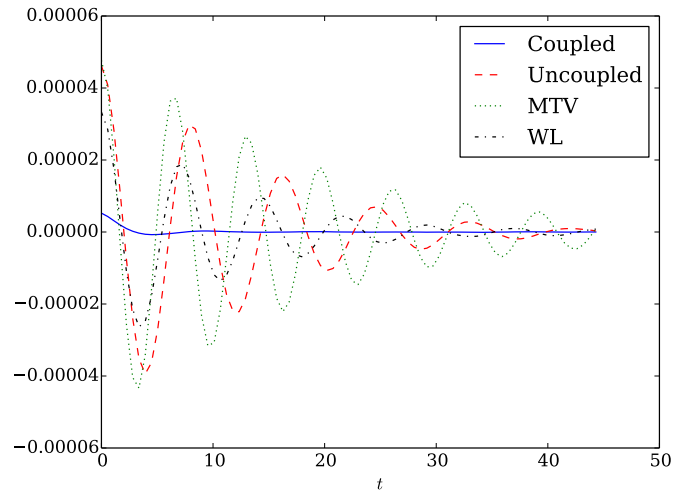

**Oceanic variables** Only the PDFs are available for these variables.

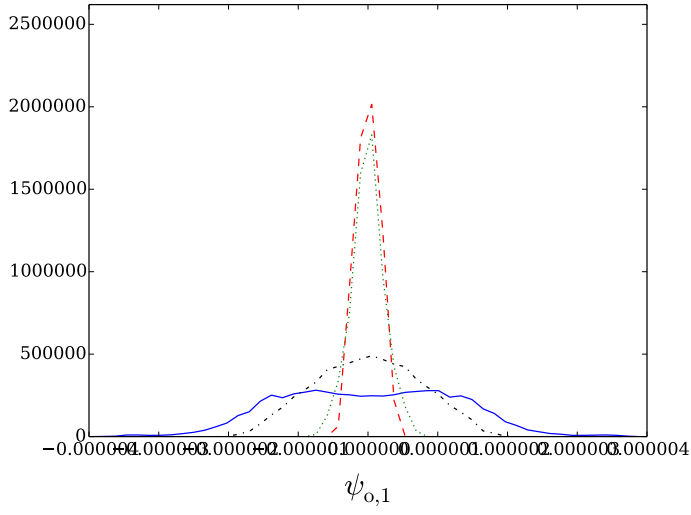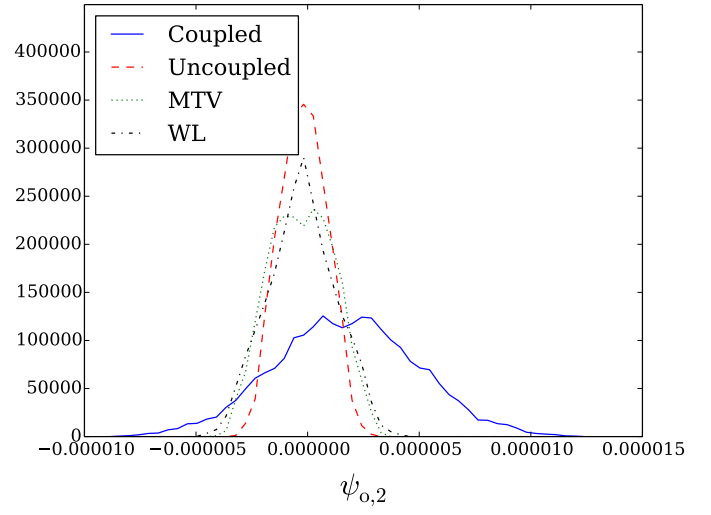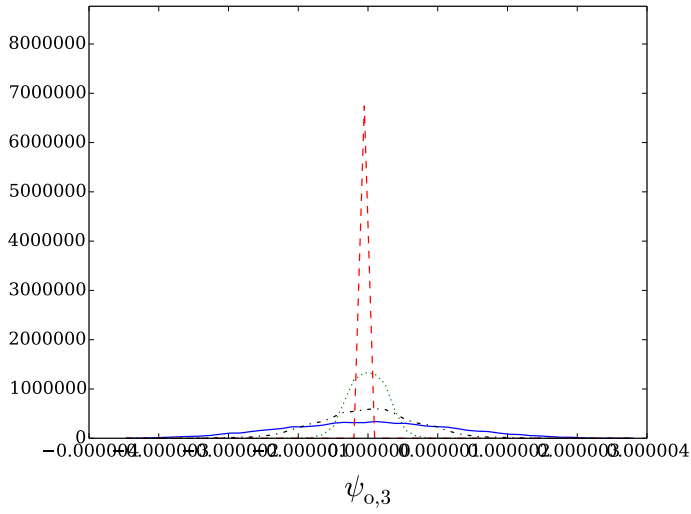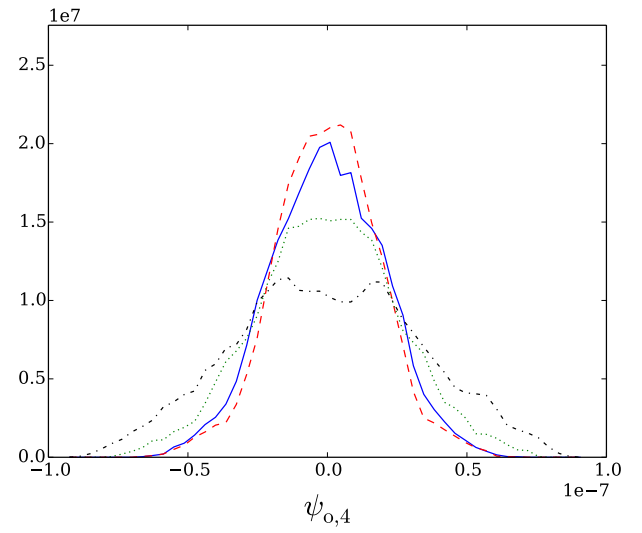

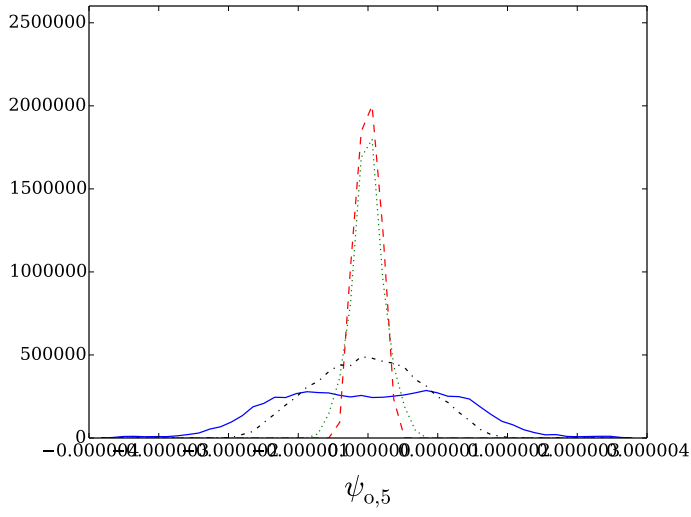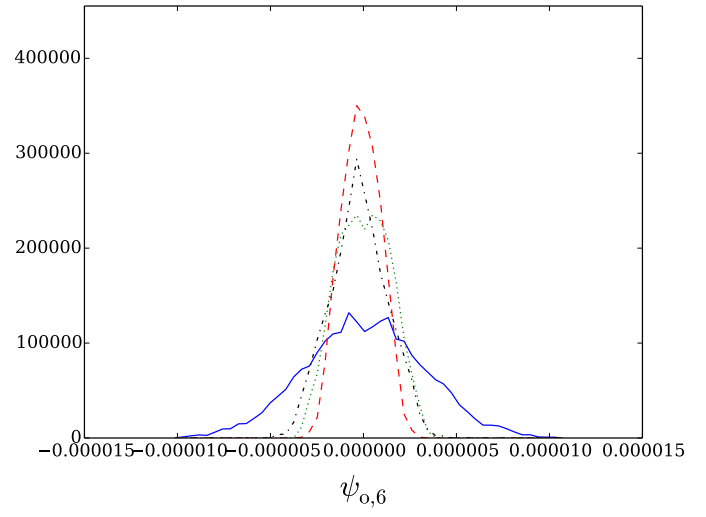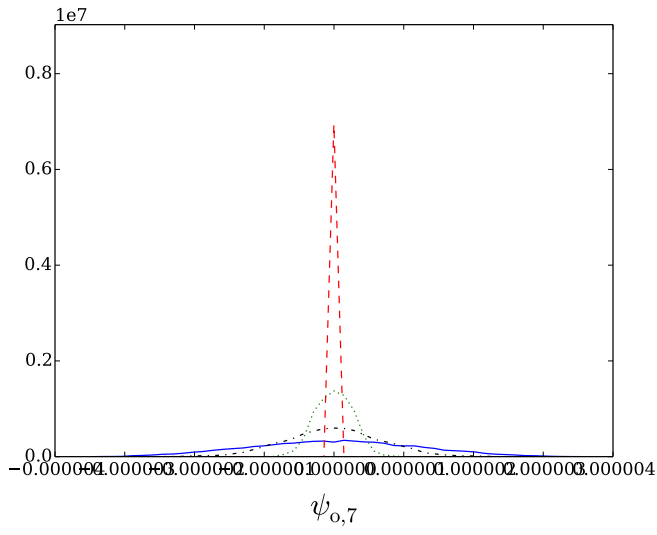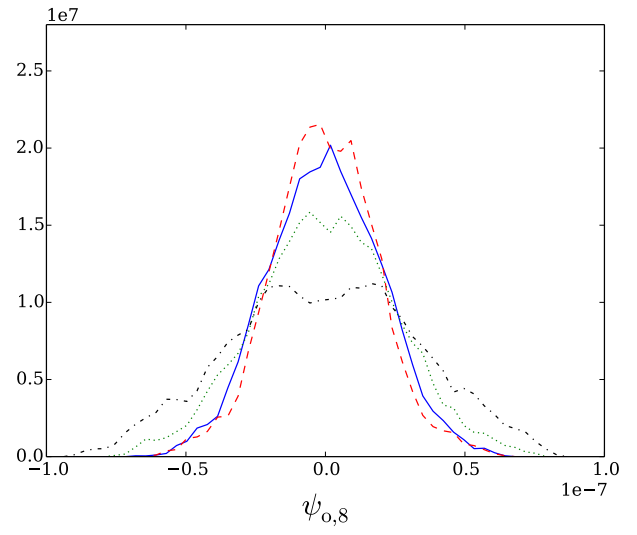

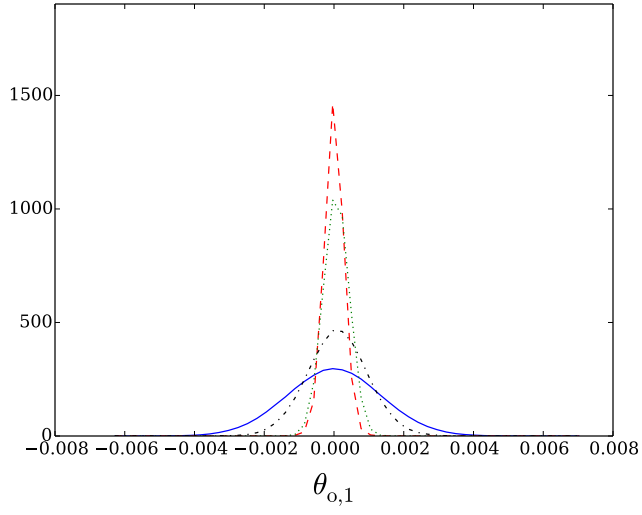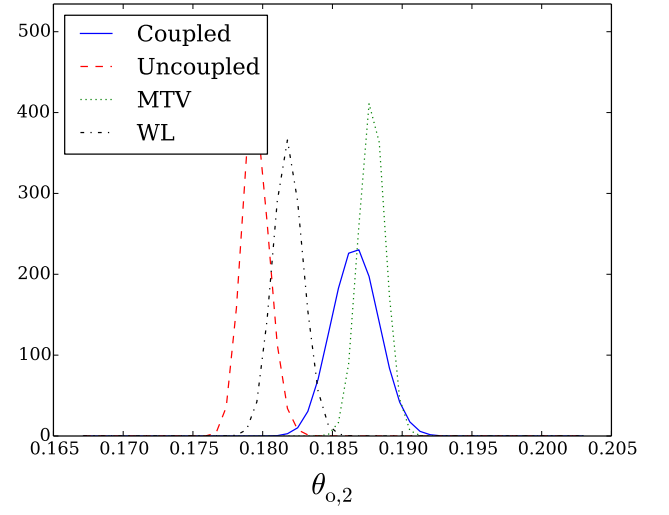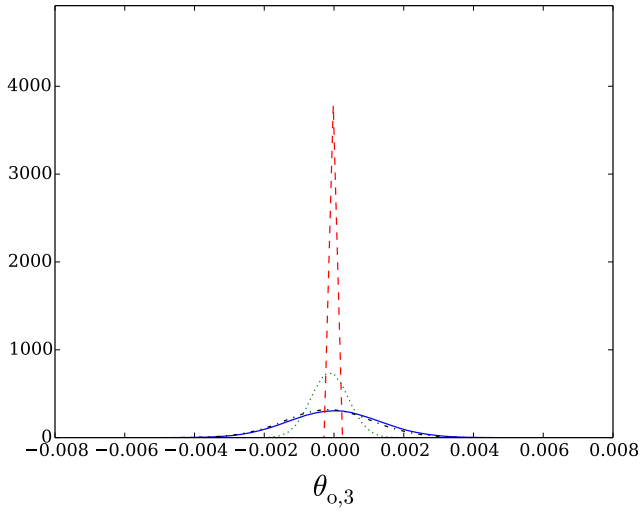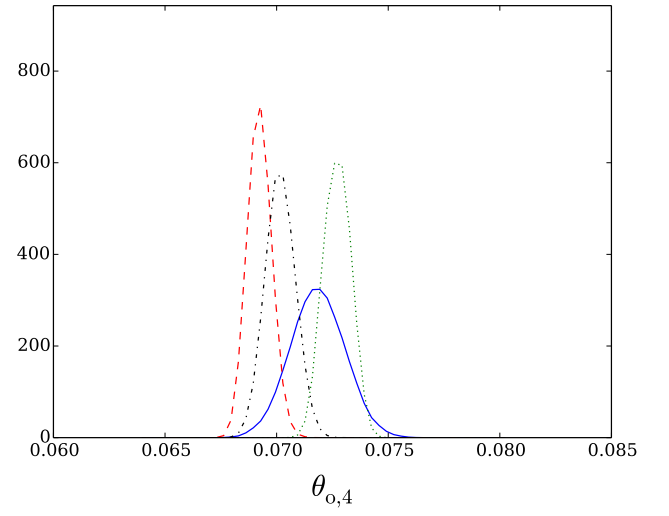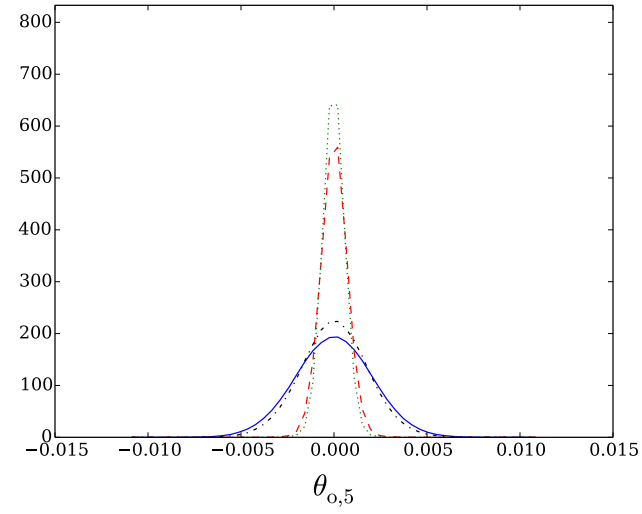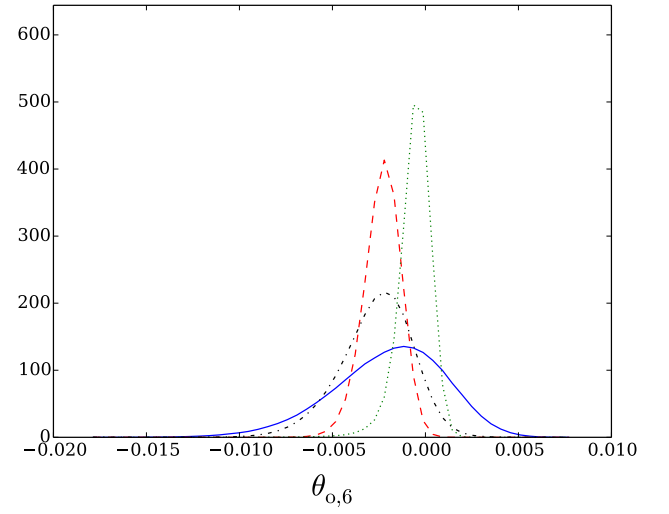

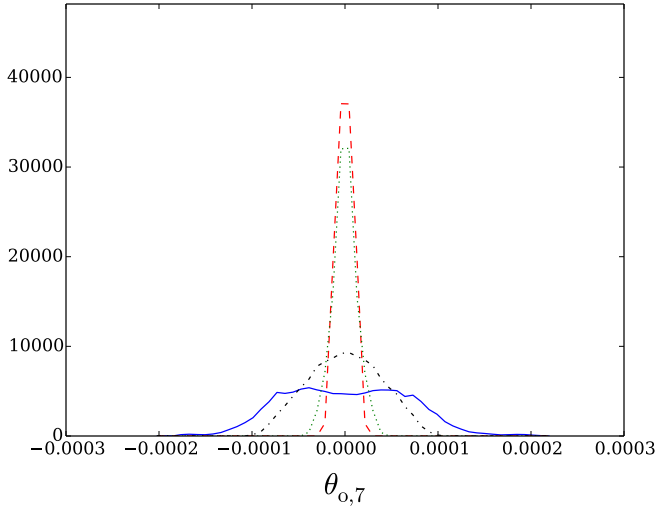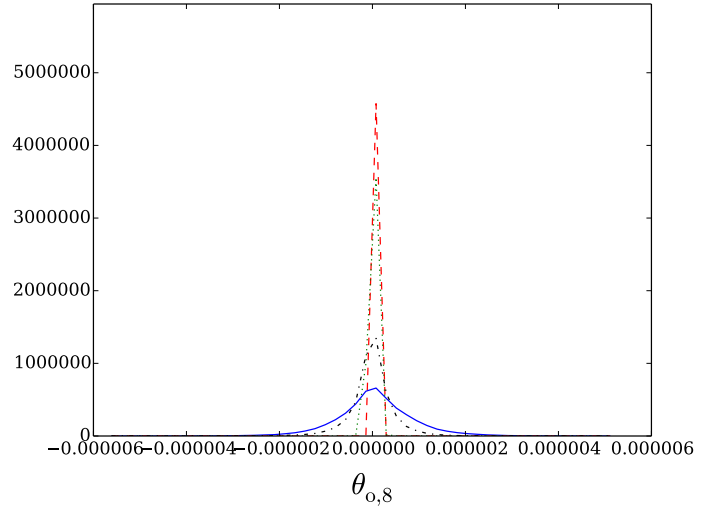

### 3.2.2 Kullback-Leibler divergences

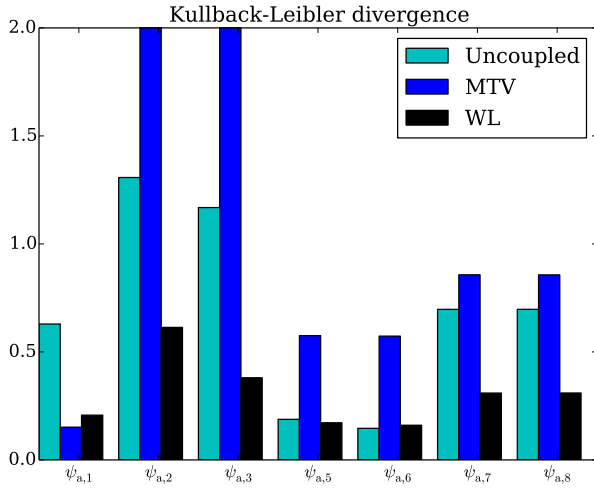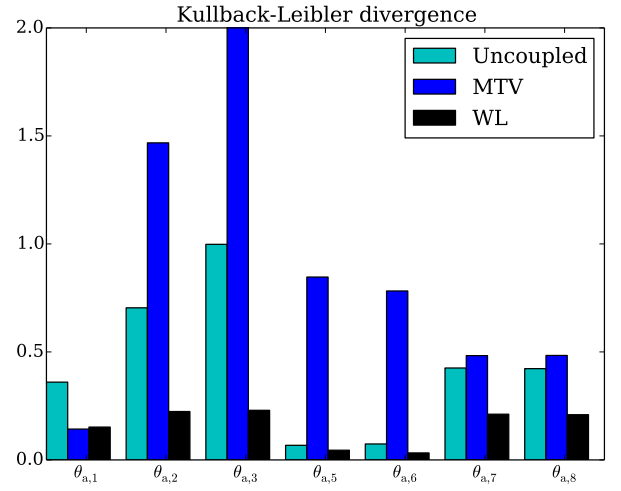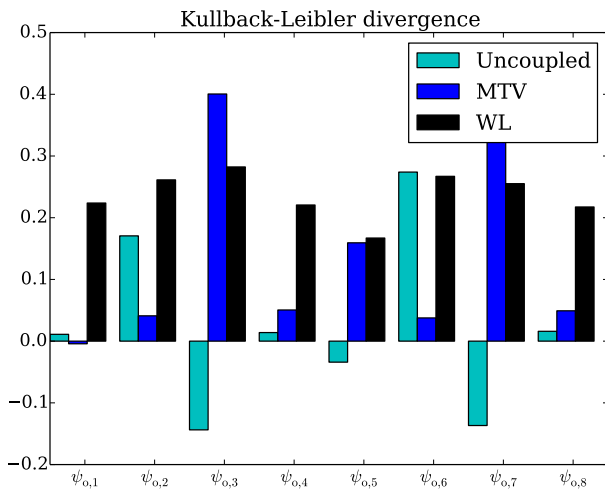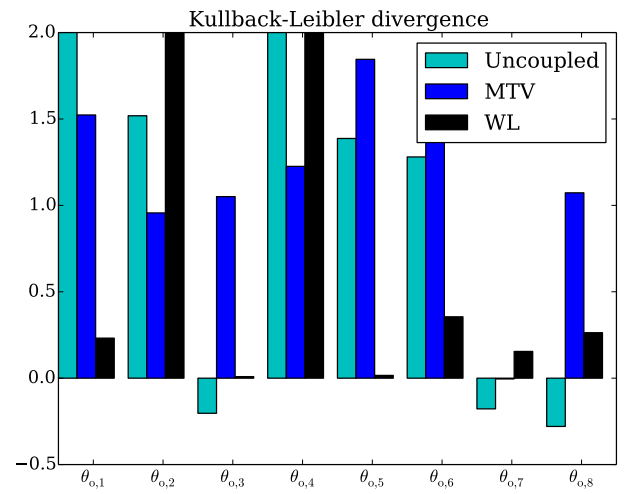

Supplement: Supplementary file 1 [file npg-25-605-2018-supplement.zip]
