# Supplementary material for: Comparison of stochastic parameterizations in the framework of a coupled ocean–atmosphere model
Source: Copernicus journal article supplement (doi:10.5194/npg-25-605-2018), 2018-08-30
Supplement: Supplementary file 2 [file npg-25-605-2018-supplement.zip]

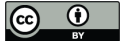

*Supplement of*

## **Comparison of stochastic parameterizations in the framework of a coupled ocean–atmosphere model**

**Jonathan Demaeyer and Stéphane Vannitsem**

*Correspondence to:* Stéphane Vannitsem (svn@meteo.be)

- [npg-25-605-2018-supplement-title-page.pdf](#)
- [MAOOAM-1.3-stochastic.zip](#)
- [supp\\_mat.pdf](#)

The copyright of individual parts of the supplement might differ from the CC BY 4.0 License.
